# Supplementary material for: Soy Formula Is Not Estrogenic and Does Not Result in Reproductive Toxicity in Male Piglets: Results from a Controlled Feeding Study
Source: MDPI journal article supplement (doi:10.3390/nu14051126), 2022-03-07
Supplement: s1 [file s1]

| Reannotated Gene   | Gene               | Fold Change | FDR  |
|--------------------|--------------------|-------------|------|
| RNF213             | RNF213_tvX1        | 83.9        | 0    |
| FOXL2              | FOXL2              | 60.9        | 0    |
| MUC6               | ENSSSCG00000012835 | 47.4        | 0.01 |
| ENSSSCG00000042543 | ENSSSCG00000042543 | 46.3        | 0    |
| LOC102166616       | ENSSSCG00000049504 | 44.1        | 0.01 |
| ADTRP              | ADTRP              | 41          | 0.01 |
| KIF25              | KIF25_tv1          | 37.6        | 0.01 |
| PDE4A              | PDE4A_tv2          | 34.9        | 0.02 |
| PTPRH              | PTPRH              | 33.5        | 0.03 |
| CBLN4              | CBLN4              | 30.5        | 0.05 |
| GPR143             | ENSSSCG00000012103 | 19.8        | 0    |
| RRP8               | RRP8               | 13.7        | 0    |
| CYP1A1             | CYP1A1             | 13.1        | 0    |
| NOTCH3             | NOTCH3_tv1         | 13          | 0.01 |
| SYNDIG1L           | SYNDIG1L           | 11.7        | 0.02 |
| ZNF521             | ZNF521_tv1         | 11.6        | 0.01 |
| OBSCN              | OBSCN_tv1          | 11.4        | 0.01 |
| DMBT1L             | ENSSSCG00000046807 | 11.3        | 0    |
| PGLYRP1            | PGLYRP1            | 11          | 0    |
| HYOU1              | HYOU1_tv2          | 10          | 0.02 |
| MRGPRX2L1*         | MRGPRX2L1*         | 9.9         | 0.01 |
| LINGO1             | LINGO1             | 9.8         | 0    |
| ENSSSCG00000048148 | ENSSSCG00000048148 | 9.5         | 0    |
| CIC                | CIC_tvX1           | 9.4         | 0    |
| UNK129*            | UNK129             | 9.4         | 0    |
| PRR7               | PRR7               | 9.1         | 0.01 |
| ENSSSCG00000050327 | ENSSSCG00000050327 | 9           | 0.01 |
| ARHGEF1            | ARHGEF1_tv2        | 8.9         | 0.02 |
| NUP214             | NUP214_tv2         | 8.9         | 0.03 |
| MUC5B              | ENSSSCG00000033452 | 8.5         | 0.02 |
| PRSS3L1            | PRSS3L1            | 8.1         | 0.03 |
| SIX2               | SIX2               | 8.1         | 0    |
| IL17REL            | ENSSSCG00000000983 | 8           | 0.04 |
| HGSNATPs*          | ENSSSCG00000041416 | 7.7         | 0.04 |
| ENSSSCG00000041828 | ENSSSCG00000041828 | 7.6         | 0.04 |
| ENSSSCG00000045623 | ENSSSCG00000045623 | 7.6         | 0.04 |
| CX3CL1             | CX3CL1_tv1         | 7.4         | 0.05 |
| SIAH3              | SIAH3              | 7.1         | 0    |
| LMX1B              | LMX1B              | 7.1         | 0    |
| TRPC7              | TRPC7              | 6.7         | 0    |
| BRI3BPPs*          | ENSSSCG00000041154 | 6.7         | 0    |
| SOX8               | SOX8               | 6.5         | 0.02 |
| C1orf167           | ENSSSCG00000046656 | 6.4         | 0    |
| ARHGAP32           | ARHGAP32_tv2       | 6.4         | 0.01 |
| NUMA1              | NUMA1_tvX1         | 6.3         | 0    |
| NDUFA4L2           | NDUFA4L2           | 6.3         | 0.01 |

|                           |                    |     |      |
|---------------------------|--------------------|-----|------|
| GATA1                     | GATA1              | 6.3 | 0.02 |
| ENSSSCG00000042711        | ENSSSCG00000042711 | 6.3 | 0    |
| MUC6                      | MUC6               | 6.3 | 0.01 |
| LncRNA                    | LncRNA             | 6   | 0    |
| MAP4K4                    | MAP4K4_tv1         | 5.8 | 0.02 |
| ARHGAP45                  | ARHGAP45_tv1       | 5.8 | 0.02 |
| TNXB                      | TNXB_tv3           | 5.8 | 0.01 |
| GPAT2L*                   | ENSSSCG00000037588 | 5.8 | 0.02 |
| NR2F1                     | NR2F1_tv1          | 5.7 | 0    |
| KCNC1                     | KCNC1              | 5.6 | 0    |
| ENSSSCG00000048770        | ENSSSCG00000048770 | 5.6 | 0.02 |
| JADE2                     | JADE2_tv2          | 5.5 | 0.01 |
| COL9A1                    | COL9A1_tv1         | 5.4 | 0    |
| R3HDM2                    | R3HDM2             | 5.4 | 0    |
| AANAT                     | AANAT              | 5.3 | 0.04 |
| FZD9                      | FZD9               | 5.3 | 0    |
| PTGIR                     | PTGIR              | 5.3 | 0    |
| RERE                      | RERE_tv2           | 5.2 | 0.04 |
| FABP3L2                   | FABP3L2            | 5.2 | 0.01 |
| PTPRS                     | PTPRS_tvX1         | 5.1 | 0.01 |
| CACNA1B                   | CACNA1B_tv1        | 5   | 0.01 |
| FCGBP                     | FCGBP              | 5   | 0.01 |
| SELENOV                   | SELENOV_tv1        | 4.9 | 0.05 |
| LncRNA                    | LncRNA             | 4.9 | 0    |
| BCL11B                    | BCL11B             | 4.9 | 0.01 |
| PCDHB10                   | PCDHB10            | 4.8 | 0.04 |
| ENSSSCG00000045565        | ENSSSCG00000045565 | 4.7 | 0.01 |
| LIN28B                    | LIN28B             | 4.7 | 0.04 |
| LAG3                      | LAG3               | 4.6 | 0.03 |
| MKL2                      | MKL2_tv1           | 4.6 | 0.01 |
| PCDH1                     | PCDH1_tv2          | 4.6 | 0    |
| SLC8A2                    | SLC8A2             | 4.6 | 0.01 |
| SNORA54                   | SNORA54            | 4.6 | 0.02 |
| ENSSSCG00000051007        | ENSSSCG00000051007 | 4.5 | 0    |
| LOC105372912              | ENSSSCG00000041374 | 4.5 | 0.02 |
| EPPK1                     | EPPK1              | 4.5 | 0    |
| LOC110260214              | ENSSSCG00000045100 | 4.5 | 0.03 |
| SLC35F6                   | SLC35F6            | 4.5 | 0.01 |
| LOC100514340              | ENSSSCG00000032383 | 4.4 | 0    |
| ENSSSCG00000047888        | ENSSSCG00000047888 | 4.4 | 0    |
| HPCAL1                    | HPCAL1             | 4.4 | 0    |
| CXCL12                    | CXCL12_tv3         | 4.4 | 0    |
| ZNF446                    | ZNF446_tv1         | 4.3 | 0.05 |
| ITPKB                     | ENSSSCG00000047967 | 4.3 | 0.04 |
| CORO2A                    | CORO2A             | 4.3 | 0.01 |
| LOC110255902/LOC110256040 | ENSSSCG00000047490 | 4.3 | 0    |
| SAXO1                     | SAXO1              | 4.3 | 0.04 |

|                    |                    |     |      |
|--------------------|--------------------|-----|------|
| ENSSSCG00000043864 | ENSSSCG00000043864 | 4.3 | 0.02 |
| KCNG1              | KCNG1              | 4.2 | 0.02 |
| ROM1               | ROM1               | 4.2 | 0.02 |
| TVP23A             | TVP23A             | 4.2 | 0    |
| SPINK5             | SPINK5             | 4.2 | 0    |
| ENSSSCG00000045307 | ENSSSCG00000045307 | 4.1 | 0.03 |
| PRODH              | PRODH              | 4.1 | 0.01 |
| TNRC6B             | TNRC6B_tv3         | 4.1 | 0    |
| FURIN              | FURIN_tv2          | 4.1 | 0.05 |
| COL18A1            | COL18A1_tv2        | 4.1 | 0    |
| ENSSSCG00000044418 | ENSSSCG00000044418 | 4.1 | 0    |
| NRIP2              | NRIP2              | 4   | 0.01 |
| SLC2A9             | SLC2A9             | 4   | 0.02 |
| AHSP               | AHSP_tv1           | 4   | 0    |
| LOC110260394       | ENSSSCG00000042007 | 4   | 0    |
| ENSSSCG00000044546 | ENSSSCG00000044546 | 4   | 0.04 |
| ENSSSCG00000042223 | ENSSSCG00000042223 | 4   | 0.01 |
| EDN3               | EDN3               | 4   | 0.04 |
| COLQ               | COLQ               | 4   | 0.04 |
| IGFN1              | ENSSSCG00000036948 | 4   | 0    |
| RGS12              | RGS12_tv2          | 4   | 0    |
| ERICH3             | ENSSSCG00000003781 | 4   | 0    |
| FOXH1              | FOXH1              | 3.9 | 0.03 |
| ISM1               | ISM1               | 3.9 | 0.02 |
| KIAA1109           | KIAA1109_tv2       | 3.9 | 0    |
| DCHS1              | DCHS1_tv1          | 3.9 | 0    |
| CD300CL*           | CD300CL*           | 3.9 | 0    |
| ENSSSCG00000041762 | ENSSSCG00000041762 | 3.9 | 0.02 |
| FER1L4             | FER1L4             | 3.9 | 0.04 |
| CR1                | CR1                | 3.9 | 0    |
| THSD4              | THSD4_tvX1         | 3.8 | 0    |
| MOG                | MOG_tva            | 3.8 | 0    |
| SNORA48            | SNORA48            | 3.8 | 0.01 |
| SMIM31             | SMIM31             | 3.8 | 0.05 |
| ETS1               | ETS1_tv1           | 3.8 | 0    |
| PPP1R3G            | ENSSSCG00000041566 | 3.8 | 0.02 |
| ENSSSCG00000035996 | ENSSSCG00000035996 | 3.8 | 0.05 |
| EVPL               | EVPL               | 3.8 | 0    |
| IGHG3              | IGHG3              | 3.8 | 0.04 |
| TMEM37             | TMEM37             | 3.8 | 0    |
| PAX5               | PAX5_tv1           | 3.8 | 0.02 |
| NPY6R              | NPY6R              | 3.8 | 0.01 |
| PRSS45P            | PRSS45P            | 3.8 | 0    |
| KCNH1              | KCNH1              | 3.8 | 0    |
| ENSSSCG00000042133 | ENSSSCG00000042133 | 3.7 | 0.01 |
| SLFN11             | ENSSSCG00000032652 | 3.7 | 0.03 |
| FBXL13             | FBXL13             | 3.7 | 0    |

|                     |                     |     |      |
|---------------------|---------------------|-----|------|
| ALOX12              | ALOX12              | 3.7 | 0    |
| SDC3                | SDC3                | 3.7 | 0    |
| SPACA6              | SPACA6              | 3.7 | 0    |
| C17orf82            | C17orf82            | 3.7 | 0.05 |
| QRFPR               | QRFPR               | 3.6 | 0    |
| KCNMB1              | KCNMB1_tv1          | 3.6 | 0    |
| LOC110255544        | ENSSSCG000000041966 | 3.6 | 0.02 |
| SLC51B              | SLC51B_tv           | 3.6 | 0.01 |
| COL4A3              | COL4A3              | 3.6 | 0.01 |
| APLN                | APLN                | 3.6 | 0    |
| ENSSSCG00000000207  | ENSSSCG00000000207  | 3.6 | 0.03 |
| NEFM                | NEFM                | 3.6 | 0.01 |
| CEACAM16            | CEACAM16            | 3.6 | 0.02 |
| KCNQ1OT1            | KCNQ1OT1            | 3.6 | 0.01 |
| ENSSSCG000000048251 | ENSSSCG000000048251 | 3.6 | 0.03 |
| PLEC                | PLEC                | 3.6 | 0    |
| LncRNA              | LncRNA              | 3.6 | 0    |
| SOX10               | SOX10               | 3.5 | 0.02 |
| PLXNB3              | PLXNB3              | 3.5 | 0    |
| P4HA1               | P4HA1_tv1           | 3.5 | 0    |
| MYH9                | MYH9                | 3.5 | 0    |
| SLC13A5             | SLC13A5_tv1         | 3.5 | 0    |
| BMP6                | BMP6                | 3.5 | 0    |
| HAS1                | HAS1                | 3.4 | 0    |
| DNHD1               | DNHD1_tv1           | 3.4 | 0.01 |
| PCDHAC2             | PCDHAC2_tv1         | 3.4 | 0.01 |
| SLIT1               | SLIT1_tv1           | 3.4 | 0    |
| TAFA5               | TAFA5               | 3.4 | 0    |
| BSN                 | BSN_tv1             | 3.4 | 0    |
| SHISA7              | SHISA7              | 3.4 | 0.01 |
| LOC110260790        | ENSSSCG000000049984 | 3.4 | 0    |
| MXRA5               | ENSSSCG000000039926 | 3.4 | 0    |
| NUDCD3              | NUDCD3              | 3.4 | 0    |
| LGR5                | LGR5                | 3.3 | 0    |
| LOC102162336        | ENSSSCG000000032301 | 3.3 | 0.03 |
| ENSSSCG000000041780 | ENSSSCG000000041780 | 3.3 | 0    |
| CTSZ                | CTSZ                | 3.3 | 0.03 |
| TMEM151A            | TMEM151A            | 3.3 | 0    |
| GLIS2               | GLIS2               | 3.3 | 0.02 |
| DLX6                | DLX6                | 3.3 | 0    |
| BDH1                | BDH1                | 3.3 | 0.04 |
| MFGE8               | MFGE8_tv3           | 3.3 | 0    |
| HUWE1               | HUWE1_tvX1          | 3.3 | 0    |
| KCNQ2               | KCNQ2               | 3.3 | 0.02 |
| SMAD7               | SMAD7               | 3.3 | 0    |
| NOTCH1              | NOTCH1              | 3.3 | 0    |
| NES                 | NES                 | 3.3 | 0    |

|                    |                    |     |      |
|--------------------|--------------------|-----|------|
| SPHK1              | SPHK1_tv2          | 3.2 | 0    |
| GSN                | GSN_tv2            | 3.2 | 0.02 |
| ENSSSCG00000048105 | ENSSSCG00000048105 | 3.2 | 0    |
| CROCC              | CROCC_tv           | 3.2 | 0    |
| LncRNA             | LncRNA             | 3.2 | 0    |
| ENSSSCG00000044645 | ENSSSCG00000044645 | 3.2 | 0    |
| FLRT2              | FLRT2_tvX1         | 3.2 | 0.02 |
| ENSSSCG00000018657 | ENSSSCG00000018657 | 3.2 | 0    |
| EHF                | EHF                | 3.2 | 0.02 |
| NAV1               | NAV1_tvX8          | 3.2 | 0.01 |
| PTCH1              | PTCH1_tv8          | 3.2 | 0    |
| SRL                | SRL                | 3.2 | 0.04 |
| THBS4              | THBS4              | 3.2 | 0    |
| RRBP1              | RRBP1              | 3.1 | 0    |
| NTF3               | NTF3               | 3.1 | 0    |
| DVL1               | DVL1_tvX1          | 3.1 | 0.01 |
| FCRL5              | FCRL5              | 3.1 | 0.04 |
| FGFR1              | FGFR1              | 3.1 | 0    |
| RNF183             | RNF183             | 3.1 | 0.02 |
| LRP1               | LRP1               | 3.1 | 0    |
| LOC110255791       | ENSSSCG00000044808 | 3.1 | 0    |
| PKNOX2             | PKNOX2             | 3.1 | 0    |
| SLC1A7             | SLC1A7             | 3.1 | 0.01 |
| ENSSSCG00000051523 | ENSSSCG00000051523 | 3.1 | 0.02 |
| ENSSSCG00000026908 | ENSSSCG00000026908 | 3.1 | 0    |
| LAMA5              | ENSSSCG00000032761 | 3.1 | 0    |
| LRRC8D             | LRRC8D             | 3.1 | 0    |
| CSMD1              | CSMD1_tvX1         | 3.1 | 0    |
| ADAMTS16           | ADAMTS16_tv1       | 3.1 | 0    |
| SLC6A9             | SLC6A9             | 3.1 | 0    |
| MAPKAPK2           | MAPKAPK2           | 3   | 0    |
| ENSSSCG00000043549 | ENSSSCG00000043549 | 3   | 0.01 |
| INAVA              | INAVA              | 3   | 0.01 |
| SALL3              | SALL3_tv1          | 3   | 0    |
| KIT                | KIT_tv3            | 3   | 0    |
| NTRK3              | NTRK3_tv1          | 3   | 0.02 |
| LOC110260611       | ENSSSCG00000035352 | 3   | 0    |
| ICAM5              | ICAM5_tvX1         | 3   | 0.01 |
| TARDBPPs*          | TARDBPPs*          | 3   | 0.04 |
| TNRC18             | TNRC18             | 3   | 0    |
| DSCAM              | DSCAM              | 3   | 0    |
| KMT2D              | KMT2D              | 3   | 0    |
| SYNGAP1            | SYNGAP1            | 3   | 0    |
| LOC100513133       | ENSSSCG00000044913 | 3   | 0    |
| NEFH               | NEFH               | 3   | 0.02 |
| LOC107984638       | LOC107984638       | 3   | 0.05 |
| LOC110256821       | ENSSSCG00000048625 | 3   | 0.04 |

|                    |                    |     |      |
|--------------------|--------------------|-----|------|
| PLAT               | PLAT_tv1           | 3   | 0    |
| LLGL2              | LLGL2              | 3   | 0    |
| MYH6               | MYH6               | 3   | 0    |
| SF1                | SF1_tv6            | 3   | 0.03 |
| ZBTB4              | ZBTB4_tv2          | 3   | 0.02 |
| ABCA13             | ABCA13_tv1         | 3   | 0    |
| ENSSSCG00000046488 | ENSSSCG00000046488 | 3   | 0.05 |
| COL22A1            | COL22A1_tv1        | 3   | 0    |
| GRIN3B             | GRIN3B_tv1         | 2.9 | 0    |
| AGRN               | AGRN               | 2.9 | 0    |
| lncRNA             | lncRNA             | 2.9 | 0    |
| PRKAR1B            | PRKAR1B            | 2.9 | 0    |
| HRH2               | HRH2_tv1           | 2.9 | 0    |
| CSPG4              | CSPG4              | 2.9 | 0    |
| GNB3               | GNB3               | 2.9 | 0.01 |
| TRPM4              | TRPM4              | 2.9 | 0    |
| UPF1               | UPF1_tv2           | 2.9 | 0.03 |
| GRIN2A             | GRIN2A_tv1         | 2.9 | 0    |
| ABLIM2             | ABLIM2_tv1         | 2.9 | 0.01 |
| JAK1               | JAK1_tv3           | 2.9 | 0    |
| SPTBN4             | ENSSSCG00000037494 | 2.9 | 0.02 |
| KLHL35             | KLHL35             | 2.9 | 0.01 |
| BCL9L              | BCL9L              | 2.9 | 0    |
| LOC110257830       | LOC110257830       | 2.9 | 0    |
| B3GAT1             | B3GAT1             | 2.9 | 0    |
| VWF                | VWF                | 2.9 | 0    |
| KCNK12             | KCNK12             | 2.9 | 0    |
| DYNC1H1            | DYNC1H1            | 2.9 | 0    |
| KCNIP2             | KCNIP2             | 2.8 | 0    |
| MIR2887-2          | MIR2887-2          | 2.8 | 0.04 |
| GRIK5              | GRIK5              | 2.8 | 0    |
| NSD2               | NSD2               | 2.8 | 0    |
| STK24              | STK24              | 2.8 | 0    |
| SHANK2             | SHANK2_tv1         | 2.8 | 0    |
| PKD1               | PKD1               | 2.8 | 0    |
| MAP1A              | MAP1A              | 2.8 | 0    |
| WSCD2              | WSCD2              | 2.8 | 0    |
| ABCC6              | ABCC6_tv1          | 2.8 | 0.01 |
| ITGA7              | ITGA7              | 2.8 | 0    |
| ZC3H18             | ZC3H18             | 2.8 | 0    |
| OXTR               | OXTR_tv1           | 2.8 | 0.01 |
| COL4A2             | COL4A2             | 2.8 | 0    |
| NOVA2              | NOVA2              | 2.8 | 0.02 |
| NAV2               | NAV2               | 2.8 | 0    |
| POLR2A             | POLR2A             | 2.8 | 0    |
| LAMC1              | LAMC1              | 2.8 | 0    |
| ARHGAP39           | ARHGAP39           | 2.8 | 0    |

|                    |                    |     |      |
|--------------------|--------------------|-----|------|
| FGFR2              | FGFR2              | 2.8 | 0    |
| CEP250             | CEP250             | 2.8 | 0    |
| APLNR              | APLNR              | 2.8 | 0    |
| EXOC3L2            | ENSSSCG00000040410 | 2.8 | 0    |
| SRCAP              | SRCAP_tv1          | 2.8 | 0    |
| ADAMTS7            | ADAMTS7            | 2.8 | 0    |
| GPR162             | GPR162_tvA         | 2.8 | 0.01 |
| CSF1               | CSF1_tv1           | 2.8 | 0.01 |
| MAP2K7             | MAP2K7             | 2.8 | 0    |
| TTBK1              | TTBK1              | 2.8 | 0    |
| TNFRSF6B           | ENSSSCG00000036595 | 2.8 | 0    |
| RASSF5             | RASSF5             | 2.8 | 0    |
| COL9A2             | COL9A2             | 2.8 | 0    |
| LRRC3              | LRRC3              | 2.8 | 0    |
| DENND2B            | DENND2B            | 2.8 | 0    |
| PPFIBP2            | PPFIBP2            | 2.7 | 0    |
| DYSF               | DYSF               | 2.7 | 0    |
| ERBB3              | ERBB3_tv1          | 2.7 | 0    |
| ESPN               | ESPN               | 2.7 | 0    |
| LOC102165318       | LOC102165318       | 2.7 | 0    |
| TNR                | TNR                | 2.7 | 0    |
| NMNAT3             | NMNAT3             | 2.7 | 0    |
| PCNT               | PCNT_tv1           | 2.7 | 0    |
| GLIS1              | ENSSSCG00000003846 | 2.7 | 0    |
| CDH24              | CDH24_tv2          | 2.7 | 0    |
| HIPK4              | HIPK4              | 2.7 | 0.02 |
| PTAFR              | PTAFR              | 2.7 | 0.02 |
| SORL1              | SORL1              | 2.7 | 0    |
| SH3BP1             | SH3BP1             | 2.7 | 0.01 |
| LOC106509601       | ENSSSCG00000042596 | 2.7 | 0.01 |
| TNN                | TNN                | 2.7 | 0    |
| MOB2               | MOB2               | 2.7 | 0    |
| ENSSSCG00000044428 | ENSSSCG00000044428 | 2.7 | 0    |
| CACNA1E            | CACNA1E_tv1        | 2.7 | 0    |
| SCARNA12           | SCARNA12           | 2.7 | 0.02 |
| SYT3               | SYT3               | 2.7 | 0    |
| MXRA5              | ENSSSCG00000012832 | 2.7 | 0    |
| AP2A1              | AP2A1              | 2.7 | 0    |
| GSG1L              | GSG1L_tv1          | 2.7 | 0.01 |
| PPP1R12B           | PPP1R12B           | 2.7 | 0    |
| PENK               | PENK               | 2.7 | 0    |
| SOGA1              | SOGA1              | 2.7 | 0    |
| ELAC2              | ELAC2              | 2.7 | 0    |
| HCFC1              | ENSSSCG00000012793 | 2.7 | 0    |
| NEURL1B            | NEURL1B            | 2.7 | 0    |
| AGPAT3             | AGPAT3             | 2.7 | 0    |
| CLCF1              | CLCF1              | 2.7 | 0    |

|                    |                    |     |      |
|--------------------|--------------------|-----|------|
| ZFHX2              | ZFHX2_tv1          | 2.7 | 0.01 |
| SHB                | SHB                | 2.7 | 0    |
| CRTC1              | CRTC1              | 2.7 | 0    |
| NBEAL2             | NBEAL2_tv1         | 2.7 | 0    |
| SLC9A2             | SLC9A2             | 2.7 | 0.05 |
| DIDO1              | DIDO1_tv3          | 2.7 | 0    |
| FPGS               | FPGS               | 2.7 | 0.02 |
| IGSF3              | IGSF3_tv1          | 2.6 | 0    |
| LTBP4              | LTBP4              | 2.6 | 0    |
| USP12              | USP12              | 2.6 | 0    |
| VWA2               | VWA2               | 2.6 | 0.03 |
| HTR4               | HTR4               | 2.6 | 0    |
| ZNF316             | ZNF316             | 2.6 | 0    |
| TCF7               | TCF7               | 2.6 | 0    |
| CELSR2             | CELSR2             | 2.6 | 0    |
| ANKRD11            | ANKRD11            | 2.6 | 0    |
| SEC14L1            | SEC14L1            | 2.6 | 0    |
| TLN1               | TLN1               | 2.6 | 0    |
| PIEZO1             | PIEZO1             | 2.6 | 0    |
| BCORL              | BCORL              | 2.6 | 0.04 |
| SPEN               | SPEN               | 2.6 | 0    |
| JAG2               | JAG2_tv1           | 2.6 | 0    |
| VDR                | VDR_tvt            | 2.6 | 0.03 |
| ADARB2             | ADARB2             | 2.6 | 0.01 |
| LTBP3              | LTBP3              | 2.6 | 0    |
| SYT15              | ENSSSCG00000028341 | 2.6 | 0.02 |
| MYH15              | MYH15              | 2.6 | 0.02 |
| KBTBD4             | KBTBD4_tv2         | 2.6 | 0.05 |
| ABCC10             | ABCC10             | 2.6 | 0    |
| ENSSSCG00000030555 | ENSSSCG00000030555 | 2.6 | 0.02 |
| CASZ1              | CASZ1              | 2.6 | 0.04 |
| SYNE1              | SYNE1_tvX11        | 2.6 | 0.04 |
| DOCK6              | DOCK6_tv2          | 2.6 | 0.02 |
| LAMA1              | LAMA1_tv1          | 2.6 | 0    |
| PIK3R2             | PIK3R2             | 2.6 | 0    |
| ARID1A             | ARID1A_tv1         | 2.6 | 0    |
| LMOD1              | LMOD1              | 2.6 | 0    |
| ENSSSCG00000042625 | ENSSSCG00000042625 | 2.6 | 0.04 |
| HLX                | HLX_tv1            | 2.6 | 0    |
| BCORL1             | BCORL1             | 2.6 | 0    |
| NLRC5              | NLRC5              | 2.6 | 0.02 |
| CNTNAP5            | CNTNAP5_tvX1       | 2.6 | 0.02 |
| TRAF4              | TRAF4              | 2.6 | 0.02 |
| KMT2B              | KMT2B_tv1          | 2.6 | 0    |
| RNF216             | RNF216             | 2.6 | 0    |
| CNTRL              | CNTRL_tv1          | 2.6 | 0.03 |
| SORCS2             | SORCS2             | 2.6 | 0    |



|          |                    |     |      |
|----------|--------------------|-----|------|
| CASKIN1  | CASKIN1            | 2.6 | 0    |
| SLC22A17 | SLC22A17           | 2.6 | 0    |
| TAS1R3   | TAS1R3_tv          | 2.6 | 0.05 |
| ZNF385C  | ZNF385C            | 2.6 | 0.04 |
| WNT11    | WNT11              | 2.6 | 0.01 |
| LAMC3    | LAMC3_tv1          | 2.6 | 0    |
| BCAM     | BCAM_tv1           | 2.6 | 0    |
| GRB10    | GRB10              | 2.6 | 0    |
| CREBBP   | CREBBP_tv1         | 2.6 | 0    |
| NR5A2    | NR5A2              | 2.5 | 0    |
| NCDN     | NCDN_tv3           | 2.5 | 0.01 |
| HPDL     | HPDL               | 2.5 | 0.01 |
| NCOR2    | NCOR2_tv3          | 2.5 | 0    |
| EPN2     | EPN2_tv2           | 2.5 | 0    |
| SLX4     | SLX4_tv1           | 2.5 | 0    |
| LRP4     | LRP4_tv1           | 2.5 | 0    |
| SCD5     | SCD5_tv1           | 2.5 | 0    |
| NDST2    | ENSSSCG00000010310 | 2.5 | 0.01 |
| SBK2     | SBK2               | 2.5 | 0.02 |
| ADGRL1   | ADGRL1_tv1         | 2.5 | 0    |
| NOTCH2   | NOTCH2             | 2.5 | 0    |
| LAMB3    | LAMB3_tv1          | 2.5 | 0    |
| HIVEP3   | HIVEP3             | 2.5 | 0.02 |
| KLHL29   | KLHL29             | 2.5 | 0    |
| ARHGEF17 | ARHGEF17_tvX1      | 2.5 | 0    |
| PRR12    | PRR12_tv1          | 2.5 | 0    |
| PRDM16   | PRDM16             | 2.5 | 0.03 |
| ZBTB46   | ZBTB46_tvX3        | 2.5 | 0    |
| SH2B2    | SH2B2              | 2.5 | 0.03 |
| NWD1     | NWD1               | 2.5 | 0.02 |
| SEPTIN8  | SEPTIN8            | 2.5 | 0    |
| CHD5     | CHD5               | 2.5 | 0.02 |
| MEGF11   | MEGF11             | 2.5 | 0    |
| TCOF1    | TCOF1_tvX3         | 2.5 | 0    |
| WSB2     | WSB2               | 2.5 | 0    |
| PAXIP1   | PAXIP1             | 2.5 | 0    |
| SKI      | SKI                | 2.5 | 0    |
| SAMD11   | SAMD11             | 2.5 | 0    |
| CTBP2    | CTBP2              | 2.5 | 0    |
| LGALS3BP | LGALS3BP           | 2.5 | 0.02 |
| SLC52A3  | SLC52A3            | 2.5 | 0    |
| TSPAN15  | TSPAN15_tv1        | 2.5 | 0    |
| SLC26A10 | SLC26A10           | 2.5 | 0    |
| TFEB     | TFEB               | 2.5 | 0    |
| MKI67    | ENSSSCG00000026302 | 2.5 | 0    |
| ADRA1D   | ADRA1D             | 2.5 | 0.01 |
| SRRM2    | SRRM2              | 2.5 | 0    |

|              |                    |     |      |
|--------------|--------------------|-----|------|
| KIAA1549     | ENSSSCG00000016513 | 2.5 | 0    |
| ACOT11       | ACOT11_tv1         | 2.5 | 0    |
| SLC22A23     | SLC22A23           | 2.5 | 0    |
| CACNA2D4     | CACNA2D4           | 2.5 | 0.03 |
| PPM1H        | PPM1H              | 2.5 | 0    |
| RPS6KA2      | RPS6KA2            | 2.5 | 0    |
| CYP2S1       | CYP2S1             | 2.5 | 0    |
| FBLN2        | FBLN2              | 2.5 | 0    |
| MAP4K2       | MAP4K2             | 2.5 | 0.03 |
| PDGFRB       | PDGFRB             | 2.5 | 0    |
| LncRNA       | LncRNA             | 2.5 | 0.01 |
| CHD7         | CHD7_tv1           | 2.5 | 0    |
| ARHGEF40     | ARHGEF40           | 2.5 | 0    |
| LOC102166195 | ENSSSCG00000038005 | 2.5 | 0.02 |
| NCOR2        | NCOR2              | 2.5 | 0    |
| TET3         | TET3               | 2.5 | 0    |
| CACNA1C      | ENSSSCG00000027725 | 2.5 | 0    |
| COL4A1       | COL4A1             | 2.5 | 0    |
| AP2A2        | AP2A2              | 2.5 | 0    |
| CACNG4       | CACNG4             | 2.5 | 0    |
| PLCB3        | PLCB3              | 2.5 | 0    |
| MYH7B        | MYH7B_tv1          | 2.5 | 0    |
| MED24        | MED24              | 2.5 | 0    |
| SIPA1        | SIPA1              | 2.5 | 0    |
| ZBTB42       | ZBTB42             | 2.5 | 0.03 |
| IL17D        | IL17D              | 2.5 | 0    |
| COL27A1      | COL27A1_tv1        | 2.5 | 0    |
| TBX1         | TBX1               | 2.4 | 0    |
| BEGAIN       | BEGAIN             | 2.4 | 0.05 |
| MYH14        | MYH14_tv1          | 2.4 | 0.02 |
| NRCAM        | NRCAM              | 2.4 | 0.02 |
| SEC16A       | SEC16A             | 2.4 | 0    |
| SPTB         | SPTB               | 2.4 | 0.01 |
| COL6A1       | COL6A1             | 2.4 | 0    |
| WDR1         | WDR1               | 2.4 | 0    |
| PLXNA1       | PLXNA1             | 2.4 | 0    |
| ELFN1        | ENSSSCG00000048398 | 2.4 | 0.03 |
| FLNA         | FLNA_tv1           | 2.4 | 0    |
| CCL22        | CCL22_tv1          | 2.4 | 0.01 |
| EBP          | ENSSSCG00000032768 | 2.4 | 0.02 |
| SPATA21      | SPATA21            | 2.4 | 0.03 |
| BPTF         | BPTF_tv1           | 2.4 | 0.01 |
| MRC2         | MRC2               | 2.4 | 0    |
| SCARNA2      | SCARNA2            | 2.4 | 0.02 |
| PLXND1       | PLXND1             | 2.4 | 0    |
| KIF7         | KIF7               | 2.4 | 0    |
| SLC6A17L*    | ENSSSCG00000038264 | 2.4 | 0.01 |

|                    |                    |     |      |
|--------------------|--------------------|-----|------|
| WDR86              | WDR86_tv2          | 2.4 | 0    |
| CD248              | CD248              | 2.4 | 0    |
| ENSSSCG00000051462 | ENSSSCG00000051462 | 2.4 | 0.01 |
| H19                | H19_tv1            | 2.4 | 0    |
| HSD17B6            | HSD17B6            | 2.4 | 0.03 |
| KIFC3              | KIFC3              | 2.4 | 0    |
| MPP2               | MPP2               | 2.4 | 0.04 |
| EDAR               | EDAR               | 2.4 | 0.01 |
| TRAF3IP1           | TRAF3IP1           | 2.4 | 0    |
| FAIM2              | FAIM2              | 2.4 | 0    |
| NIPAL4             | NIPAL4             | 2.4 | 0.01 |
| HNRNPUL2           | HNRNPUL2           | 2.4 | 0    |
| RAI1               | RAI1               | 2.4 | 0    |
| LOC102159171       | ENSSSCG00000035711 | 2.4 | 0.02 |
| COL13A1            | COL13A1_tv1        | 2.4 | 0    |
| SLPI               | SLPI               | 2.4 | 0.03 |
| CHD3               | CHD3_tv1           | 2.4 | 0    |
| ETV4               | ETV4_tv2           | 2.4 | 0    |
| SHROOM2            | SHROOM2            | 2.4 | 0    |
| CHID1              | CHID1              | 2.4 | 0    |
| FASN               | FASN               | 2.4 | 0    |
| ITGA3              | ITGA3_tva          | 2.4 | 0    |
| RBM19              | RBM19              | 2.4 | 0    |
| PPARD              | PPARD              | 2.4 | 0    |
| ASTN1              | ASTN1_tvX1         | 2.4 | 0    |
| RCVRN              | RCVRN              | 2.4 | 0.02 |
| DLGAP3             | DLGAP3             | 2.4 | 0    |
| MYH3               | MYH3               | 2.4 | 0.01 |
| UNC5B              | UNC5B              | 2.4 | 0    |
| TRAF5              | TRAF5              | 2.4 | 0.05 |
| DFNB31             | DFNB31             | 2.4 | 0.02 |
| LOC110255292       | ENSSSCG00000043013 | 2.4 | 0    |
| PCDH12             | PCDH12             | 2.4 | 0    |
| CLPB               | CLPB               | 2.4 | 0    |
| LOC110261123       | ENSSSCG00000047147 | 2.4 | 0    |
| PLXNA2             | PLXNA2             | 2.4 | 0    |
| TENM4              | TENM4              | 2.4 | 0    |
| BICRA              | BICRA              | 2.4 | 0    |
| SOGA2              | SOGA2              | 2.4 | 0.01 |
| PIAS4              | PIAS4              | 2.4 | 0    |
| CCDC102A           | CCDC102A           | 2.4 | 0    |
| PTPN6              | PTPN6              | 2.4 | 0    |
| LRP8               | LRP8               | 2.3 | 0    |
| SETD1B             | SETD1B_tvX1        | 2.3 | 0    |
| PEPD               | PEPD               | 2.3 | 0    |
| MEGF8              | MEGF8              | 2.3 | 0    |
| DPP6               | DPP6               | 2.3 | 0    |

|                    |                    |     |      |
|--------------------|--------------------|-----|------|
| VANGL2             | VANGL2             | 2.3 | 0    |
| NPTX1              | NPTX1              | 2.3 | 0.01 |
| EP400              | EP400              | 2.3 | 0    |
| BRD4               | BRD4_tv1           | 2.3 | 0    |
| RTN4RL1            | RTN4RL1            | 2.3 | 0    |
| PRRC2A             | PRRC2A_tv          | 2.3 | 0    |
| MAPK12             | MAPK12             | 2.3 | 0.01 |
| IGFBP5             | IGFBP5             | 2.3 | 0    |
| SHANK1             | SHANK1_tv1         | 2.3 | 0.03 |
| PPP1R37            | PPP1R37            | 2.3 | 0    |
| KCNB1              | KCNB1              | 2.3 | 0.01 |
| LOC102161632       | ENSSSCG00000045748 | 2.3 | 0.04 |
| SELENOO            | SELENOO            | 2.3 | 0    |
| GPR35              | GPR35              | 2.3 | 0.01 |
| CLCN6              | CLCN6_tv1          | 2.3 | 0    |
| LPP                | LPP_tv             | 2.3 | 0    |
| NEDD9              | NEDD9              | 2.3 | 0    |
| MEIS3              | MEIS3              | 2.3 | 0.02 |
| MAP2K3             | MAP2K3             | 2.3 | 0    |
| SUN1               | SUN1               | 2.3 | 0    |
| MIR4332            | MIR4332            | 2.3 | 0.05 |
| ADARB1             | ADARB1_tv1         | 2.3 | 0    |
| PKN1               | PKN1_tv2           | 2.3 | 0.01 |
| ENSSSCG00000047144 | ENSSSCG00000047144 | 2.3 | 0    |
| RGS7BP             | RGS7BP             | 2.3 | 0.03 |
| ENSSSCG00000051360 | ENSSSCG00000051360 | 2.3 | 0.01 |
| ZC3H13             | ZC3H13_tvX8        | 2.3 | 0    |
| STARD9             | ENSSSCG00000022039 | 2.3 | 0    |
| ROBO4              | ROBO4              | 2.3 | 0    |
| MYH10              | ENSSSCG00000038144 | 2.3 | 0    |
| ENG                | ENG_tv1            | 2.3 | 0    |
| L1TD1              | L1TD1              | 2.3 | 0    |
| SH3PXD2A           | SH3PXD2A           | 2.3 | 0    |
| H6PD               | H6PD               | 2.3 | 0    |
| CA11               | CA11_tv1           | 2.3 | 0    |
| PPRC1              | PPRC1              | 2.3 | 0    |
| THRA               | THRA_tv1           | 2.3 | 0    |
| IGF1R              | IGF1R_tv           | 2.3 | 0    |
| RTN4RL2            | RTN4RL2            | 2.3 | 0.01 |
| NR1H2              | NR1H2              | 2.3 | 0.01 |
| UNKL               | ENSSSCG00000022963 | 2.3 | 0    |
| ETV6               | ETV6               | 2.3 | 0    |
| ANKRD24            | ANKRD24            | 2.3 | 0    |
| HMGN5              | HMGN5              | 2.3 | 0    |
| ZNF469             | ZNF469_tvX1        | 2.3 | 0.03 |
| JUP                | JUP                | 2.3 | 0    |
| SCMH1              | SCMH1              | 2.3 | 0    |

|                    |                    |     |      |
|--------------------|--------------------|-----|------|
| JPH4               | JPH4_tv1           | 2.3 | 0    |
| CHST1              | CHST1              | 2.3 | 0    |
| WNT3               | WNT3               | 2.3 | 0    |
| CCL24              | CCL24_tv1          | 2.3 | 0.01 |
| lncRNA             | lncRNA             | 2.3 | 0.02 |
| HECTD4             | HECTD4_tv1         | 2.3 | 0    |
| TAF3               | TAF3               | 2.3 | 0    |
| ANXA10             | ANXA10             | 2.3 | 0.03 |
| HPX                | HPX                | 2.3 | 0.01 |
| SLC6A17            | SLC6A17            | 2.3 | 0    |
| ZNF853             | ZNF853             | 2.3 | 0    |
| UVSSA              | UVSSA              | 2.3 | 0.02 |
| DIS3L2             | DIS3L2             | 2.3 | 0    |
| HIRIP3             | HIRIP3_tv1         | 2.3 | 0    |
| NID2               | NID2               | 2.3 | 0    |
| CCDC22             | CCDC22             | 2.3 | 0    |
| MDN1               | MDN1               | 2.3 | 0    |
| SEMA4D             | SEMA4D             | 2.3 | 0.01 |
| FAT3               | FAT3_tv1           | 2.3 | 0.02 |
| BCAR3              | BCAR3              | 2.3 | 0    |
| LOC110256059       | ENSSSCG00000046684 | 2.3 | 0.01 |
| CD68               | CD68               | 2.3 | 0.04 |
| HEY2               | HEY2               | 2.3 | 0    |
| OTUB1              | OTUB1              | 2.3 | 0.03 |
| POM121C            | POM121C            | 2.3 | 0    |
| GTF3C1             | GTF3C1             | 2.3 | 0    |
| FAM83H             | FAM83H             | 2.2 | 0    |
| FAM53A             | FAM53A             | 2.2 | 0.01 |
| FYN                | FYN                | 2.2 | 0    |
| ADGRA2             | ADGRA2_tv1         | 2.2 | 0    |
| TUB                | TUB                | 2.2 | 0.05 |
| CRAMP1             | CRAMP1             | 2.2 | 0    |
| GAREM2             | GAREM2             | 2.2 | 0.01 |
| ZNF541             | ZNF541             | 2.2 | 0    |
| ACE                | ACE_tv1            | 2.2 | 0    |
| NCK2               | NCK2               | 2.2 | 0    |
| ARFGEF3            | ARFGEF3            | 2.2 | 0.01 |
| LCMT1L3*           | LCMT1L3*           | 2.2 | 0    |
| KCNQ1              | KCNQ1              | 2.2 | 0    |
| CAPZB              | CAPZB              | 2.2 | 0    |
| MED12              | MED12              | 2.2 | 0    |
| ANKH               | ANKH               | 2.2 | 0    |
| TRIM26             | TRIM26             | 2.2 | 0    |
| ZNF890             | ENSSSCG00000033648 | 2.2 | 0.02 |
| DOT1L              | DOT1L_tvX1         | 2.2 | 0    |
| GNAO1              | GNAO1              | 2.2 | 0.01 |
| ENSSSCG00000051028 | ENSSSCG00000051028 | 2.2 | 0.03 |

|                    |                    |     |      |
|--------------------|--------------------|-----|------|
| FOXO6              | FOXO6              | 2.2 | 0    |
| NFRKB              | NFRKB              | 2.2 | 0    |
| RNF165             | RNF165             | 2.2 | 0.01 |
| GMEB2              | GMEB2              | 2.2 | 0    |
| AMZ1               | AMZ1               | 2.2 | 0.01 |
| LY9L6              | LY9L6_tv1          | 2.2 | 0    |
| PRRC2B             | PRRC2B             | 2.2 | 0    |
| ELAVL4             | ELAVL4             | 2.2 | 0.01 |
| ADGRG5             | ADGRG5             | 2.2 | 0    |
| TRIM71             | TRIM71             | 2.2 | 0    |
| LSG1               | LSG1               | 2.2 | 0.03 |
| FADD               | FADD               | 2.2 | 0    |
| LRP2               | LRP2               | 2.2 | 0.02 |
| WNT5B              | WNT5B_tv1          | 2.2 | 0.02 |
| TMEM214            | TMEM214_tv2        | 2.2 | 0    |
| DCHS2              | DCHS2_tv3          | 2.2 | 0.02 |
| ZNF609             | ZNF609_tv1         | 2.2 | 0    |
| ABCA14             | ABCA14             | 2.2 | 0.03 |
| SMAD3              | SMAD3              | 2.2 | 0    |
| DAAM2              | DAAM2_tv1          | 2.2 | 0    |
| SFRP1              | SFRP1              | 2.2 | 0.01 |
| AMPD2              | AMPD2              | 2.2 | 0.02 |
| FGF1               | FGF1_tv1           | 2.2 | 0.03 |
| GATD3A             | GATD3A             | 2.2 | 0    |
| CDH4               | CDH4_tv1           | 2.2 | 0    |
| SYNPO2L            | SYNPO2L            | 2.2 | 0    |
| CHD6               | CHD6               | 2.2 | 0    |
| TNK2               | TNK2_tv1           | 2.2 | 0    |
| PWWP2B             | PWWP2B             | 2.2 | 0.03 |
| ZFHX3              | ZFHX3_tv1          | 2.2 | 0.01 |
| SAFB               | SAFB_tv2           | 2.2 | 0    |
| MAP1B              | MAP1B_tv1          | 2.2 | 0    |
| NCOR1              | NCOR1_tvX37        | 2.2 | 0    |
| SAMD4B             | SAMD4B_tv1         | 2.2 | 0.01 |
| SDK2               | SDK2_tvX1          | 2.2 | 0    |
| PDXK               | PDXK               | 2.2 | 0    |
| FANCA              | FANCA              | 2.2 | 0    |
| GRK2               | GRK2               | 2.2 | 0.01 |
| SCARF2             | SCARF2             | 2.2 | 0    |
| AMH                | AMH                | 2.2 | 0    |
| FAT1               | FAT1_tv1           | 2.2 | 0    |
| BEND4              | BEND4              | 2.2 | 0.01 |
| ENSSSCG00000048975 | ENSSSCG00000048975 | 2.2 | 0.03 |
| HR                 | HR                 | 2.2 | 0    |
| HTRA1              | HTRA1              | 2.2 | 0    |
| ZBTB20             | ZBTB20_tv1         | 2.2 | 0    |
| HIVEP1             | HIVEP1             | 2.2 | 0    |

|              |                    |     |      |
|--------------|--------------------|-----|------|
| CCDC88C      | CCDC88C            | 2.2 | 0    |
| NFIC         | NFIC               | 2.2 | 0    |
| SLC35C2      | SLC35C2            | 2.2 | 0.02 |
| PRRC2C       | PRRC2C             | 2.2 | 0    |
| RAP1GAP2     | ENSSSCG00000034858 | 2.2 | 0    |
| MACF1        | MACF1_tv1          | 2.2 | 0    |
| SYNPO        | SYNPO              | 2.2 | 0    |
| NTM          | NTM                | 2.2 | 0    |
| EPHB3        | EPHB3              | 2.2 | 0    |
| TOB2         | TOB2_tvX1          | 2.2 | 0.01 |
| DST          | DST                | 2.2 | 0    |
| lncRNA       | lncRNA             | 2.2 | 0    |
| CYTH1        | CYTH1              | 2.2 | 0    |
| DHRX         | ENSSSCG00000039144 | 2.2 | 0    |
| PTCH2        | PTCH2_tv1          | 2.2 | 0    |
| SPATA13      | SPATA13_tv3        | 2.2 | 0    |
| LOC106510465 | ENSSSCG00000042592 | 2.2 | 0.02 |
| ZNF646       | ZNF646             | 2.2 | 0    |
| ST3GAL3      | ST3GAL3            | 2.2 | 0    |
| SRGAP1       | SRGAP1             | 2.2 | 0    |
| ZNF503       | ZNF503             | 2.2 | 0    |
| STK11IP      | STK11IP            | 2.2 | 0.02 |
| UBR4         | UBR4               | 2.2 | 0    |
| PHRF1        | PHRF1              | 2.2 | 0    |
| NAV3         | NAV3               | 2.2 | 0.01 |
| HBZ          | HBZ                | 2.2 | 0    |
| CARD11       | CARD11_tv2         | 2.2 | 0.05 |
| CD44         | CD44               | 2.2 | 0.04 |
| ADAMTSL2     | ADAMTSL2           | 2.2 | 0.02 |
| OSBPL5       | OSBPL5_tv1         | 2.1 | 0    |
| FOXP4        | FOXP4              | 2.1 | 0    |
| ACTR1B       | ACTR1B             | 2.1 | 0.02 |
| UBA1         | UBA1               | 2.1 | 0    |
| STARD13Ps*   | ENSSSCG00000046579 | 2.1 | 0.01 |
| BCL3         | BCL3_tvX1          | 2.1 | 0    |
| FCHO1        | FCHO1              | 2.1 | 0.01 |
| PRDM2        | PRDM2_tv           | 2.1 | 0    |
| SSC5D        | SSC5D_tv1          | 2.1 | 0    |
| ADCY9        | ADCY9              | 2.1 | 0    |
| MICAL3       | MICAL3             | 2.1 | 0    |
| KCNQ3        | KCNQ3              | 2.1 | 0    |
| CCNJL        | CCNJL              | 2.1 | 0    |
| UMODL1       | UMODL1             | 2.1 | 0.03 |
| BAHCC1       | ENSSSCG00000023045 | 2.1 | 0    |
| PEG3         | PEG3_tv1           | 2.1 | 0    |
| ELF4         | ELF4_tv1           | 2.1 | 0    |
| TNS3         | TNS3_tv1           | 2.1 | 0    |

|          |                    |     |      |
|----------|--------------------|-----|------|
| MPRIP    | MPRIP              | 2.1 | 0    |
| COL5A1   | COL5A1             | 2.1 | 0    |
| ZNF618   | ZNF618             | 2.1 | 0    |
| PTPRF    | PTPRF              | 2.1 | 0    |
| ADGRL3   | ADGRL3_tv1         | 2.1 | 0    |
| CDH5     | CDH5               | 2.1 | 0    |
| TSPAN4   | TSPAN4             | 2.1 | 0    |
| TRAM2    | TRAM2              | 2.1 | 0    |
| EML3     | EML3               | 2.1 | 0    |
| ST3GAL4  | ST3GAL4            | 2.1 | 0    |
| IKZF4    | IKZF4              | 2.1 | 0    |
| HSPG2    | HSPG2              | 2.1 | 0    |
| KCNJ4    | KCNJ4_tv1          | 2.1 | 0.03 |
| PTMS     | PTMS               | 2.1 | 0    |
| FOXF1    | FOXF1              | 2.1 | 0.04 |
| PFKM     | PFKM               | 2.1 | 0.01 |
| DGKZ     | DGKZ               | 2.1 | 0    |
| CTBP1    | CTBP1              | 2.1 | 0    |
| ERCC4    | ERCC4              | 2.1 | 0.03 |
| ZBED6CL  | ZBED6CL            | 2.1 | 0    |
| TBL1X    | ENSSSCG00000012102 | 2.1 | 0    |
| GLG1     | GLG1_tv            | 2.1 | 0    |
| LASP1    | LASP1              | 2.1 | 0    |
| C11orf95 | C11orf95           | 2.1 | 0    |
| USP36    | USP36              | 2.1 | 0    |
| PLXNB2   | PLXNB2             | 2.1 | 0    |
| MSC      | MSC                | 2.1 | 0    |
| SPRY4    | SPRY4              | 2.1 | 0    |
| ZNF3L*   | ENSSSCG00000031485 | 2.1 | 0.03 |
| HCK      | HCK                | 2.1 | 0.03 |
| LIPE     | LIPE               | 2.1 | 0.01 |
| COL15A1  | COL15A1_tvX1       | 2.1 | 0    |
| CBFA2T3  | CBFA2T3_tv1        | 2.1 | 0.01 |
| GRAMD4   | GRAMD4             | 2.1 | 0    |
| NIBAN2   | NIBAN2             | 2.1 | 0.01 |
| LDLRAD2  | LDLRAD2            | 2.1 | 0    |
| VANG1    | VANG1              | 2.1 | 0    |
| CLCN2    | CLCN2              | 2.1 | 0    |
| AFDN     | AFDN_tvX10         | 2.1 | 0    |
| VAC14    | VAC14              | 2.1 | 0    |
| CDR2     | CDR2               | 2.1 | 0    |
| MEGF6    | MEGF6              | 2.1 | 0.03 |
| PPP2R2B  | PPP2R2B            | 2.1 | 0.03 |
| SMURF1   | SMURF1_tv2         | 2.1 | 0    |
| STK39    | STK39              | 2.1 | 0    |
| MYO10    | MYO10_tv1          | 2.1 | 0    |
| CCDC158  | CCDC158            | 2.1 | 0.05 |



|                    |                    |     |      |
|--------------------|--------------------|-----|------|
| NACC2              | NACC2_tv1          | 2.1 | 0    |
| HTR1D              | HTR1D_tv1          | 2.1 | 0    |
| WWC1               | WWC1               | 2.1 | 0.03 |
| TNFRSF11A          | TNFRSF11A          | 2.1 | 0    |
| TNS1               | TNS1               | 2.1 | 0    |
| ARID3A             | ARID3A_tvX1        | 2.1 | 0    |
| PROX1              | PROX1              | 2.1 | 0.05 |
| SMAD6              | SMAD6              | 2.1 | 0.01 |
| TRIM66             | TRIM66_tv1         | 2.1 | 0    |
| FZD8               | FZD8               | 2.1 | 0    |
| RCC2               | RCC2               | 2.1 | 0    |
| AKNA               | AKNA_tv1           | 2.1 | 0    |
| DCTN1              | DCTN1_tv1          | 2.1 | 0.01 |
| SH3TC1             | SH3TC1             | 2.1 | 0    |
| CLCN7              | CLCN7              | 2.1 | 0    |
| DPYSL5             | DPYSL5             | 2.1 | 0    |
| GPR4               | GPR4               | 2.1 | 0    |
| EMILIN1            | EMILIN1            | 2.1 | 0    |
| ENSSSCG00000050854 | ENSSSCG00000050854 | 2.1 | 0    |
| PLEKHG2            | PLEKHG2_tvX3       | 2.1 | 0    |
| PSD3               | PSD3_tv1           | 2.1 | 0    |
| BRD3               | BRD3               | 2.1 | 0    |
| COL6A2             | COL6A2_tv2C2       | 2.1 | 0    |
| PER2               | PER2               | 2.1 | 0    |
| EXOC3L2            | EXOC3L2            | 2.1 | 0    |
| TNFAIP2            | TNFAIP2            | 2.1 | 0    |
| AGO2               | AGO2_tv1           | 2.1 | 0    |
| MYLK3              | MYLK3              | 2.1 | 0    |
| AACS               | AACS               | 2.1 | 0.01 |
| GANAB              | GANAB              | 2.1 | 0    |
| RAPH1              | RAPH1_tv1          | 2.1 | 0    |
| PDZD4              | PDZD4_tv1          | 2.1 | 0.02 |
| PAPLN              | PAPLN              | 2.1 | 0    |
| ZSCAN20            | ENSSSCG00000042252 | 2.1 | 0    |
| GAS7               | GAS7_tvc           | 2.1 | 0    |
| EHBP1L1            | EHBP1L1_tvX1       | 2.1 | 0    |
| SLC45A4            | SLC45A4            | 2.1 | 0.02 |
| KIAA0556           | KIAA0556_tv1       | 2.1 | 0    |
| TRIM56             | TRIM56_tv1         | 2.1 | 0    |
| RTN4R              | RTN4R              | 2.1 | 0.02 |
| ATG2A              | ATG2A_tv           | 2.1 | 0    |
| ZNF516             | ZNF516             | 2.1 | 0    |
| ARHGAP23           | ARHGAP23           | 2.1 | 0    |
| IGF2R              | IGF2R              | 2.1 | 0    |
| ZNF704             | ZNF704             | 2.1 | 0    |
| MEX3D              | MEX3D              | 2.1 | 0    |
| FRMD4A             | FRMD4A             | 2.1 | 0    |

|              |                    |     |      |
|--------------|--------------------|-----|------|
| PGLYRP3      | PGLYRP3_tvX1       | 2.1 | 0.02 |
| MZF1         | MZF1_tv2           | 2.1 | 0.04 |
| KCNK6        | KCNK6              | 2.1 | 0    |
| GATS         | GATS               | 2.1 | 0    |
| ST5          | ST5_tv3            | 2.1 | 0    |
| CD93         | CD93               | 2.1 | 0    |
| AGAP2        | AGAP2_tv2          | 2.1 | 0    |
| WNT9A        | WNT9A              | 2.1 | 0.01 |
| HTR7         | HTR7               | 2.1 | 0.02 |
| EVC2         | EVC2               | 2.1 | 0    |
| SLC1A3       | SLC1A3             | 2.1 | 0.02 |
| L1CAM        | L1CAM_tv1          | 2.1 | 0.03 |
| KMT2C        | KMT2C_tvX1         | 2.1 | 0    |
| PLXNB1       | PLXNB1_tv2         | 2.1 | 0    |
| PLCD1        | PLCD1              | 2.1 | 0.01 |
| TMEM120B     | TMEM120B           | 2.1 | 0.04 |
| ABCA4        | ABCA4              | 2.1 | 0.03 |
| PIGZ         | PIGZ               | 2.1 | 0.03 |
| WFDC2        | WFDC2              | 2.1 | 0.04 |
| GPR173       | GPR173             | 2.1 | 0    |
| TONSL        | TONSL_tv1          | 2.1 | 0    |
| DSP          | DSP                | 2.1 | 0    |
| FYCO1        | FYCO1              | 2.1 | 0    |
| SPTBN1       | SPTBN1             | 2.1 | 0    |
| NECTIN1      | NECTIN1            | 2.1 | 0    |
| TANC2        | TANC2              | 2.1 | 0    |
| PLEKHA7      | PLEKHA7            | 2.1 | 0    |
| ITGA2B       | ITGA2B             | 2.1 | 0.02 |
| SERGEF       | SERGEF             | 2.1 | 0    |
| FBN3         | FBN3               | 2.1 | 0    |
| PPP2R5D      | PPP2R5D            | 2.1 | 0.01 |
| UBE2O        | UBE2O              | 2.1 | 0    |
| LOC102164640 | ENSSSCG00000048792 | 2.1 | 0.01 |
| PRKCD        | PRKCD              | 2.1 | 0.01 |
| GPR153       | GPR153             | 2.1 | 0    |
| AQP5         | AQP5               | 2.1 | 0.04 |
| MAML3        | MAML3              | 2.1 | 0    |
| DOC2B        | DOC2B              | 2.1 | 0    |
| LMTK2        | LMTK2              | 2   | 0    |
| TIMP2        | ENSSSCG00000017164 | 2   | 0    |
| SYNE3        | SYNE3              | 2   | 0    |
| SGSM1        | SGSM1              | 2   | 0    |
| CSNK1D       | CSNK1D             | 2   | 0    |
| VAPB         | VAPB               | 2   | 0    |
| RIPOR1       | RIPOR1             | 2   | 0    |
| CELF4        | CELF4              | 2   | 0    |
| CELF2        | CELF2              | 2   | 0    |

|                    |                    |   |      |
|--------------------|--------------------|---|------|
| HOXC8              | HOXC8              | 2 | 0.02 |
| TNKS1BP1           | ENSSSCG00000035585 | 2 | 0    |
| SLC5A6             | SLC5A6             | 2 | 0.01 |
| OC90               | ENSSSCG00000005954 | 2 | 0.02 |
| KIAA0930           | KIAA0930           | 2 | 0.03 |
| SLC38A10           | SLC38A10_tv1       | 2 | 0    |
| PRODH2             | ENSSSCG00000002913 | 2 | 0.04 |
| SHANK3             | SHANK3             | 2 | 0    |
| FRMPD3             | FRMPD3             | 2 | 0.05 |
| TNRC6C             | TNRC6C             | 2 | 0    |
| KLHDC4             | KLHDC4_tv1         | 2 | 0    |
| ABCC10             | ABCC10_tvMRP7      | 2 | 0    |
| RIMS4              | RIMS4              | 2 | 0    |
| MKL1               | MKL1_tv4           | 2 | 0    |
| ARHGEF10           | ENSSSCG00000023419 | 2 | 0    |
| ELFN1              | ELFN1              | 2 | 0.03 |
| LOC110257830       | ENSSSCG00000041898 | 2 | 0.01 |
| CARD14             | CARD14_tv1         | 2 | 0.02 |
| KIF3C              | KIF3C              | 2 | 0    |
| ITIH5              | ITIH5              | 2 | 0    |
| EIF5B              | EIF5B              | 2 | 0    |
| WFS1               | WFS1               | 2 | 0    |
| ZNF526             | ZNF526             | 2 | 0    |
| UVRAG              | UVRAG              | 2 | 0    |
| PRKCA              | PRKCA              | 2 | 0    |
| FGFR4              | FGFR4              | 2 | 0    |
| DNASE1             | DNASE1             | 2 | 0.01 |
| PCDH8              | PCDH8              | 2 | 0.02 |
| PFKL               | PFKL               | 2 | 0.04 |
| PHACTR1            | PHACTR1            | 2 | 0    |
| GDI1               | GDI1               | 2 | 0.01 |
| CD99L2             | CD99L2             | 2 | 0    |
| TOP3A              | TOP3A              | 2 | 0.01 |
| ANKRD52            | ANKRD52            | 2 | 0    |
| SLC2A3             | SLC2A3             | 2 | 0    |
| SDK1               | SDK1               | 2 | 0    |
| UHRF1              | UHRF1              | 2 | 0.01 |
| ENSSSCG00000047008 | ENSSSCG00000047008 | 2 | 0.05 |
| HDGFRP2            | HDGFRP2_tv1        | 2 | 0    |
| GPM6B              | GPM6B              | 2 | 0    |
| CASKIN2            | CASKIN2_tv1        | 2 | 0    |
| SETD3              | SETD3              | 2 | 0    |
| INTS1              | INTS1              | 2 | 0    |
| LDLRAP1            | LDLRAP1            | 2 | 0.01 |
| EIF3A              | EIF3A              | 2 | 0    |
| CDK18              | CDK18_tv3          | 2 | 0    |
| TRAF7              | TRAF7              | 2 | 0.01 |

|              |              |   |      |
|--------------|--------------|---|------|
| TSPAN9       | TSPAN9_tv1   | 2 | 0    |
| BNIP3        | BNIP3        | 2 | 0    |
| HIPK2        | HIPK2        | 2 | 0    |
| SLC22A3      | SLC22A3      | 2 | 0.01 |
| EMILIN2      | EMILIN2      | 2 | 0.05 |
| SPTAN1       | SPTAN1_tv    | 2 | 0    |
| RN7SK        | RN7SK        | 2 | 0.03 |
| FAM160A1     | FAM160A1     | 2 | 0.01 |
| KNDC1        | KNDC1        | 2 | 0.03 |
| ZXDC         | ZXDC         | 2 | 0    |
| PTK2         | PTK2         | 2 | 0    |
| WDR81        | WDR81        | 2 | 0    |
| NLGN3        | NLGN3        | 2 | 0.02 |
| CENPE        | CENPE_tv1    | 2 | 0.02 |
| WNK2         | WNK2         | 2 | 0    |
| TMEM94       | TMEM94       | 2 | 0    |
| CAMSAP2      | CAMSAP2      | 2 | 0    |
| FAM43A       | FAM43A       | 2 | 0    |
| TLCD3B       | TLCD3B       | 2 | 0.03 |
| TBKBP1       | TBKBP1_tv1   | 2 | 0    |
| PEAK1        | PEAK1        | 2 | 0    |
| PRDM15       | PRDM15       | 2 | 0    |
| PTK2B        | PTK2B_tv1    | 2 | 0    |
| ITGA5        | ITGA5        | 2 | 0.02 |
| NCL          | NCL          | 2 | 0    |
| N4BP3        | N4BP3        | 2 | 0    |
| DAGLA        | DAGLA_tv1    | 2 | 0.01 |
| KIRREL1      | KIRREL1      | 2 | 0    |
| ZNF467       | ZNF467_tv1   | 2 | 0.01 |
| TRMT44       | TRMT44       | 2 | 0    |
| TTC7B        | TTC7B        | 2 | 0    |
| LOC106507059 | LOC106507059 | 2 | 0    |
| RAB40C       | RAB40C       | 2 | 0.01 |
| PPP1R9B      | PPP1R9B      | 2 | 0    |
| ELMO2        | ELMO2        | 2 | 0    |
| ARHGAP6      | ARHGAP6      | 2 | 0.02 |
| HTT          | HTT          | 2 | 0    |
| LOC106507406 | LOC106507406 | 2 | 0.01 |
| ATP1B2       | ATP1B2_tv1   | 2 | 0    |
| TRIM8        | TRIM8        | 2 | 0    |
| SMOX         | SMOX         | 2 | 0.01 |
| BRD9         | BRD9         | 2 | 0    |
| MTUS2        | MTUS2        | 2 | 0    |
| C2CD3        | C2CD3_tv1    | 2 | 0.02 |
| ABCC1        | ABCC1        | 2 | 0    |
| ZCCHC14      | ZCCHC14_tv1  | 2 | 0    |
| ASIC2        | ASIC2        | 2 | 0    |

|                    |                    |   |      |
|--------------------|--------------------|---|------|
| WSCD1              | WSCD1              | 2 | 0    |
| NFIX               | NFIX               | 2 | 0    |
| LRRC4B             | LRRC4B             | 2 | 0    |
| KBTBD11            | KBTBD11            | 2 | 0.03 |
| TSPOAP1            | TSPOAP1            | 2 | 0    |
| MLLT6              | MLLT6              | 2 | 0    |
| MTOR               | MTOR_tv1           | 2 | 0    |
| SCRIB              | SCRIB_tv1          | 2 | 0    |
| MUC3A              | MUC3A              | 2 | 0.01 |
| OSBPL2             | OSBPL2             | 2 | 0    |
| GRM7               | GRM7_tv1           | 2 | 0.01 |
| ABL1               | ABL1_tvb           | 2 | 0    |
| SMARCC2            | SMARCC2            | 2 | 0    |
| PHC2               | PHC2               | 2 | 0    |
| PTPN14             | PTPN14             | 2 | 0    |
| FAM124B            | FAM124B            | 2 | 0.01 |
| ITPR3              | ITPR3              | 2 | 0    |
| MAP7D1             | MAP7D1_tv1         | 2 | 0    |
| DEF6               | DEF6               | 2 | 0.01 |
| ZFAT               | ZFAT               | 2 | 0    |
| SMOC2              | SMOC2_tv1          | 2 | 0.03 |
| ENSSSCG00000049992 | ENSSSCG00000049992 | 2 | 0.01 |
| PRAG1              | PRAG1_tvX1         | 2 | 0    |
| LMF1               | LMF1               | 2 | 0    |
| CNNM1              | CNNM1              | 2 | 0    |
| LUZP1              | LUZP1_tv2          | 2 | 0    |
| HPSE               | HPSE_tv2           | 2 | 0.01 |
| FGD2               | FGD2               | 2 | 0.01 |
| ARAP3              | ARAP3              | 2 | 0    |
| MICAL2             | MICAL2             | 2 | 0    |
| PCNXL3             | PCNXL3_tvX4        | 2 | 0    |
| SLC12A9            | SLC12A9_tv1        | 2 | 0    |
| ARAP1              | ARAP1              | 2 | 0    |
| DAB2IP             | DAB2IP             | 2 | 0    |
| PTPN23             | PTPN23_tvX1        | 2 | 0    |
| TRRAP              | TRRAP              | 2 | 0    |
| ADCY7              | ADCY7              | 2 | 0.05 |
| MMP2               | MMP2_tv1           | 2 | 0    |
| SLC16A2            | SLC16A2            | 2 | 0.03 |
| ABCA7              | ABCA7              | 2 | 0    |
| ZC3H4              | ZC3H4              | 2 | 0    |
| LAMB2              | LAMB2              | 2 | 0    |
| CHD4               | CHD4               | 2 | 0    |
| BAZ2A              | BAZ2A              | 2 | 0    |
| TCF20              | TCF20_tv2          | 2 | 0    |
| TM4SF19            | TM4SF19            | 2 | 0    |
| DOCK3              | DOCK3              | 2 | 0    |

|          |                    |    |      |
|----------|--------------------|----|------|
| SLC9A5   | SLC9A5             | 2  | 0.02 |
| AKAP11   | AKAP11             | 2  | 0.02 |
| PLXNA3   | PLXNA3             | 2  | 0    |
| STRBP    | STRBP              | 2  | 0    |
| SLC9A1   | SLC9A1_tv1         | 2  | 0    |
| PDE2A    | PDE2A              | 2  | 0    |
| TRIOBP   | TRIOBP_tv1         | 2  | 0    |
| CFDP1    | CFDP1              | 2  | 0    |
| SCAF1    | SCAF1_tv1          | 2  | 0    |
| ARNTL    | ARNTL              | 2  | 0    |
| SPSB1    | SPSB1              | 2  | 0.02 |
| BCOR     | BCOR               | 2  | 0    |
| GGT1     | ENSSSCG00000010056 | 2  | 0    |
| ZNF276   | ZNF276_tva         | 2  | 0    |
| FLT1     | FLT1_tv1           | 2  | 0    |
| MAML2    | MAML2              | 2  | 0    |
| SIAH2    | SIAH2              | 2  | 0.04 |
| GALNT17  | GALNT17            | 2  | 0    |
| PIEZO2   | PIEZO2             | 2  | 0    |
| EEFSEC   | EEFSEC             | 2  | 0    |
| NT5DC1   | NT5DC1             | -2 | 0    |
| TOMM70A  | TOMM70A            | -2 | 0    |
| IDH3B    | IDH3B_tv1          | -2 | 0    |
| ZNF248   | ZNF248             | -2 | 0    |
| NFS1     | ENSSSCG00000007307 | -2 | 0    |
| C8orf34  | C8orf34            | -2 | 0    |
| SNX6     | SNX6               | -2 | 0    |
| CALML4   | CALML4_tv1         | -2 | 0.02 |
| HSPB8    | HSPB8              | -2 | 0    |
| RGCC     | RGCC               | -2 | 0    |
| XBP1     | XBP1               | -2 | 0    |
| SNRPD3   | ENSSSCG00000010058 | -2 | 0    |
| EXOSC9   | EXOSC9             | -2 | 0    |
| ZNF569   | ZNF569_tv1         | -2 | 0    |
| NAP1L1   | NAP1L1             | -2 | 0    |
| GNAI3    | GNAI3_tv1          | -2 | 0    |
| NOL3     | NOL3_tv1           | -2 | 0    |
| OXNAD1   | OXNAD1             | -2 | 0    |
| MTX2     | MTX2               | -2 | 0    |
| ALDH7A1  | ALDH7A1            | -2 | 0    |
| ACADSB   | ACADSB             | -2 | 0    |
| GJA1     | GJA1               | -2 | 0    |
| ITGAE    | ITGAE              | -2 | 0.02 |
| MSR1     | MSR1_tvSR-II       | -2 | 0.01 |
| TP53INP1 | TP53INP1           | -2 | 0.05 |
| SYTL3    | SYTL3              | -2 | 0.02 |
| OCIAD2   | OCIAD2             | -2 | 0    |

|              |                    |    |      |
|--------------|--------------------|----|------|
| NUP35        | NUP35              | -2 | 0    |
| FIBP         | FIBP               | -2 | 0    |
| ANO5         | ANO5               | -2 | 0    |
| ATP5MC2      | ATP5MC2            | -2 | 0    |
| MALSU1       | MALSU1             | -2 | 0    |
| RPS26        | ENSSSCG00000033697 | -2 | 0    |
| RRAGB        | RRAGB              | -2 | 0    |
| EXTL2        | EXTL2              | -2 | 0    |
| ODR4         | ODR4               | -2 | 0    |
| PPHLN1       | PPHLN1             | -2 | 0    |
| FGF7         | FGF7               | -2 | 0.02 |
| ARF4         | ARF4               | -2 | 0    |
| SACM1L       | SACM1L             | -2 | 0    |
| SKIV2L2      | SKIV2L2            | -2 | 0    |
| LRPPRC       | LRPPRC             | -2 | 0    |
| SUMO4P       | SUMO4P             | -2 | 0    |
| DDX25        | DDX25              | -2 | 0.01 |
| CAPZA1       | CAPZA1             | -2 | 0    |
| GTF3C6       | GTF3C6_tv1         | -2 | 0    |
| SKAP2        | SKAP2_tv1          | -2 | 0    |
| ATL2         | ATL2               | -2 | 0    |
| ANXA7        | ANXA7              | -2 | 0    |
| GSTZ1        | GSTZ1_tv1          | -2 | 0    |
| SURF1        | SURF1_tv1          | -2 | 0    |
| EIF4A1       | EIF4A1             | -2 | 0    |
| NCOA4        | NCOA4_tv4          | -2 | 0    |
| MRPL11       | MRPL11             | -2 | 0    |
| LRR1         | LRR1               | -2 | 0    |
| LOC110256034 | ENSSSCG00000051634 | -2 | 0    |
| MCFD2        | MCFD2              | -2 | 0    |
| TM2D2        | TM2D2              | -2 | 0    |
| TXNDC12      | TXNDC12_tv1        | -2 | 0    |
| PSMG2        | PSMG2              | -2 | 0    |
| ECD          | ECD_tv1            | -2 | 0    |
| PLOD2        | PLOD2              | -2 | 0    |
| C4orf46      | C4orf46            | -2 | 0    |
| NUTF2        | NUTF2              | -2 | 0    |
| PTGR1        | PTGR1              | -2 | 0    |
| CDC42        | CDC42_tv1          | -2 | 0    |
| RPS9         | RPS9               | -2 | 0    |
| HIBCH        | HIBCH              | -2 | 0    |
| ANKRA2       | ANKRA2             | -2 | 0    |
| OGN          | OGN_tv1            | -2 | 0    |
| BEX4         | BEX4               | -2 | 0    |
| BTF3         | BTF3               | -2 | 0    |
| PDCD6        | PDCD6              | -2 | 0    |
| RPL30        | RPL30              | -2 | 0    |

|                    |                    |    |      |
|--------------------|--------------------|----|------|
| PSMB6              | PSMB6              | -2 | 0    |
| BLVRB              | BLVRB              | -2 | 0    |
| TNNT1              | TNNT1              | -2 | 0    |
| HSD11B1            | HSD11B1_tv1        | -2 | 0    |
| PRADC1             | PRADC1             | -2 | 0    |
| PRKRA              | PRKRA              | -2 | 0    |
| PRCP               | PRCP               | -2 | 0    |
| ADSL               | ADSL               | -2 | 0    |
| LAMTOR5            | LAMTOR5_tv1        | -2 | 0    |
| SLC25A40           | SLC25A40           | -2 | 0    |
| TMEM33             | TMEM33             | -2 | 0    |
| CD24               | CD24               | -2 | 0    |
| SEC22C             | SEC22C             | -2 | 0    |
| KITLG              | KITLG_tvb          | -2 | 0    |
| RPL13A             | RPL13A_tv          | -2 | 0    |
| ABHD11             | ABHD11_tv1         | -2 | 0.01 |
| DERL3              | DERL3_tv1          | -2 | 0    |
| COX17              | COX17              | -2 | 0    |
| IGBP1              | ENSSSCG00000012382 | -2 | 0    |
| EIF3M              | EIF3M              | -2 | 0    |
| FXD1               | FXD1_tva           | -2 | 0    |
| FAM210A            | ENSSSCG00000030438 | -2 | 0    |
| TTK                | TTK                | -2 | 0    |
| KBTBD8             | KBTBD8             | -2 | 0    |
| MMRN1              | MMRN1              | -2 | 0    |
| ZNF558             | ZNF558             | -2 | 0    |
| AMD1               | AMD1_tv1           | -2 | 0    |
| OXR1               | OXR1_tv1           | -2 | 0    |
| MYRFL              | MYRFL              | -2 | 0    |
| TSFM               | TSFM_tv1           | -2 | 0    |
| CWF19L1            | CWF19L1            | -2 | 0    |
| GLRB               | GLRB               | -2 | 0.05 |
| RBM48              | RBM48              | -2 | 0    |
| MAP3K8             | MAP3K8             | -2 | 0.04 |
| CCDC59             | CCDC59             | -2 | 0    |
| RMDN2              | RMDN2              | -2 | 0    |
| RTRAF              | RTRAF              | -2 | 0    |
| DNM1L              | DNM1L              | -2 | 0    |
| CDKL3              | CDKL3              | -2 | 0.01 |
| EMC7               | EMC7               | -2 | 0    |
| LOC102161685       | LOC102161685       | -2 | 0    |
| DNAJC15            | DNAJC15            | -2 | 0    |
| ENSSSCG00000045295 | ENSSSCG00000045295 | -2 | 0    |
| CDC26              | CDC26              | -2 | 0    |
| MARCHF5            | MARCHF5            | -2 | 0    |
| SLF1               | SLF1               | -2 | 0    |
| RNF13              | RNF13              | -2 | 0    |



|                    |                     |    |      |
|--------------------|---------------------|----|------|
| INSIG2             | INSIG2              | -2 | 0    |
| SAR1B              | SAR1B_tv2           | -2 | 0    |
| RPL28              | RPL28_tv2           | -2 | 0    |
| YEATS4             | YEATS4              | -2 | 0    |
| LIPT2              | LIPT2               | -2 | 0.03 |
| POP7               | POP7                | -2 | 0    |
| ATP6V1C1           | ATP6V1C1            | -2 | 0    |
| MED7               | MED7                | -2 | 0    |
| ENSSSCG00000049808 | ENSSSCG00000049808  | -2 | 0.03 |
| MBD4               | MBD4                | -2 | 0.01 |
| SCRN3              | SCRN3               | -2 | 0.01 |
| ICT1               | ICT1                | -2 | 0    |
| MAP2K6             | MAP2K6_tv1          | -2 | 0.02 |
| POLR2E             | POLR2E              | -2 | 0    |
| TXNIP              | TXNIP_tv1           | -2 | 0    |
| HSD17B11           | HSD17B11            | -2 | 0    |
| ABCB1              | ENSSSCG00000015390  | -2 | 0.03 |
| GOLT1B             | GOLT1B              | -2 | 0    |
| TRIM59             | TRIM59_tv1          | -2 | 0    |
| GPR155             | GPR155              | -2 | 0    |
| TUBA1A             | TUBA1A_tv1          | -2 | 0    |
| LOC110256227       | ENSSSCG000000051293 | -2 | 0.01 |
| NDUFS3             | NDUFS3              | -2 | 0    |
| SGK1               | SGK1_tv1            | -2 | 0    |
| C21orf91           | C21orf91            | -2 | 0    |
| PGAM1              | PGAM1_tv1           | -2 | 0    |
| OAZ1               | OAZ1                | -2 | 0    |
| TCEB2              | TCEB2               | -2 | 0    |
| METTL27            | METTL27             | -2 | 0.01 |
| LRRC6              | LRRC6               | -2 | 0.01 |
| PIGW               | PIGW                | -2 | 0    |
| MCRIP2             | MCRIP2              | -2 | 0    |
| SUV39H2            | SUV39H2_tv1         | -2 | 0    |
| HAGH               | HAGH                | -2 | 0    |
| TRAPPC6B           | TRAPPC6B            | -2 | 0    |
| CCT3               | CCT3                | -2 | 0    |
| MORF4L2            | MORF4L2             | -2 | 0    |
| HBP1               | HBP1_tv1            | -2 | 0    |
| GLO1               | GLO1                | -2 | 0    |
| SSU72L*            | ENSSSCG00000012720  | -2 | 0.03 |
| DPT                | DPT                 | -2 | 0    |
| RABEPK             | RABEPK              | -2 | 0    |
| RPRD1A             | RPRD1A              | -2 | 0    |
| ETFBKMT            | ENSSSCG000000033766 | -2 | 0    |
| FGFR1OP2           | FGFR1OP2            | -2 | 0    |
| DDX47              | DDX47_tv1           | -2 | 0    |
| PPIL1              | PPIL1               | -2 | 0    |

|              |                    |    |      |
|--------------|--------------------|----|------|
| TSPAN6       | TSPAN6_tv1         | -2 | 0    |
| CDC20B       | CDC20B             | -2 | 0    |
| PSMB3        | PSMB3_tv1          | -2 | 0    |
| XAF1         | XAF1               | -2 | 0.01 |
| ARSB         | ARSB               | -2 | 0.01 |
| ARFIP1       | ARFIP1             | -2 | 0    |
| ARHGEF33     | ARHGEF33           | -2 | 0    |
| TYW5         | TYW5               | -2 | 0    |
| SPATA5       | SPATA5             | -2 | 0    |
| SOD2         | SOD2               | -2 | 0    |
| TPI1         | TPI1               | -2 | 0.01 |
| HNRNPK       | ENSSSCG00000022760 | -2 | 0    |
| NCBP2        | NCBP2              | -2 | 0    |
| RWDD3        | RWDD3              | -2 | 0    |
| GSR          | GSR_tv             | -2 | 0    |
| LOC102160841 | ENSSSCG00000043029 | -2 | 0.05 |
| ACP1         | ACP1_tv3           | -2 | 0    |
| HACL1        | HACL1              | -2 | 0    |
| ZNF300       | ZNF300             | -2 | 0    |
| NHEJ1        | NHEJ1_tv1          | -2 | 0    |
| PGK1         | PGK1               | -2 | 0    |
| SLC35A3      | SLC35A3_tv1        | -2 | 0    |
| CNIH4        | CNIH4              | -2 | 0    |
| APEX1        | APEX1              | -2 | 0.04 |
| SCAMP1       | SCAMP1             | -2 | 0    |
| LOC100522319 | ENSSSCG00000002850 | -2 | 0    |
| MRPS22       | MRPS22             | -2 | 0    |
| AXDND1       | AXDND1             | -2 | 0.02 |
| SLC25A21     | SLC25A21           | -2 | 0.04 |
| TEX30        | TEX30              | -2 | 0    |
| ISCA1        | ENSSSCG00000010954 | -2 | 0    |
| HAUS2        | HAUS2              | -2 | 0    |
| RPL7A        | RPL7A              | -2 | 0    |
| MRPL16       | MRPL16             | -2 | 0    |
| PAGE2B       | PAGE2B             | -2 | 0.02 |
| SGK3         | SGK3_tv1           | -2 | 0    |
| GCDH         | GCDH               | -2 | 0    |
| SEMA3C       | SEMA3C             | -2 | 0.04 |
| CHODL        | CHODL              | -2 | 0    |
| MCCC1        | MCCC1_tv1          | -2 | 0    |
| POLI         | POLI               | -2 | 0    |
| FAM151B      | FAM151B            | -2 | 0    |
| DTWD1        | DTWD1              | -2 | 0    |
| SDHAF3       | ENSSSCG00000023850 | -2 | 0    |
| DNAJA1       | ENSSSCG00000011000 | -2 | 0    |
| UHRF1BP1L    | UHRF1BP1L_tv1      | -2 | 0    |
| RUBCN        | RUBCN              | -2 | 0    |

|                    |                    |      |      |
|--------------------|--------------------|------|------|
| TRDMT1             | TRDMT1             | -2   | 0    |
| ZFP82L*            | ZFP82L*            | -2   | 0.01 |
| ALG5               | ALG5               | -2   | 0    |
| PSMC1              | PSMC1              | -2   | 0    |
| SNRPC              | SNRPC              | -2   | 0    |
| SLC25A17           | SLC25A17           | -2   | 0    |
| HIST1H2AC          | ENSSSCG00000045769 | -2   | 0.01 |
| ADK                | ADK                | -2   | 0    |
| C1QTNF12           | C1QTNF12           | -2   | 0.01 |
| MTX3               | MTX3               | -2   | 0    |
| TUBE1              | TUBE1              | -2   | 0    |
| FTL                | FTL                | -2   | 0    |
| PTGR2              | ENSSSCG00000002351 | -2   | 0    |
| C20orf27           | C20orf27           | -2   | 0    |
| SRSF7              | SRSF7              | -2   | 0    |
| OLA1               | OLA1_tv1           | -2   | 0    |
| MRPL2              | ENSSSCG00000001658 | -2   | 0    |
| MCTS1              | MCTS1              | -2   | 0    |
| ADAM10             | ADAM10             | -2   | 0    |
| EXOC5              | EXOC5_tv1          | -2   | 0    |
| RPL5               | RPL5               | -2   | 0    |
| HEBP2              | ENSSSCG00000004150 | -2   | 0    |
| ENSSSCG00000044555 | ENSSSCG00000044555 | -2   | 0    |
| SH3BGR1            | ENSSSCG00000012452 | -2   | 0    |
| NME2               | NME2               | -2   | 0    |
| WDR35              | WDR35              | -2   | 0    |
| UBLCP1             | UBLCP1             | -2   | 0    |
| CCT6A              | CCT6A_tv1          | -2   | 0    |
| FOPNL              | FOPNL              | -2   | 0    |
| TMSB4X             | ENSSSCG00000033734 | -2.1 | 0    |
| CSDE1              | CSDE1              | -2.1 | 0    |
| GNB4               | GNB4               | -2.1 | 0    |
| CLIC4              | CLIC4              | -2.1 | 0    |
| CTH                | CTH_tv1            | -2.1 | 0    |
| DPH5               | DPH5               | -2.1 | 0    |
| DPPA3L             | DPPA3L             | -2.1 | 0.01 |
| STIM1              | STIM1_tv1          | -2.1 | 0.04 |
| CUTC               | CUTC_tv1           | -2.1 | 0    |
| PITHD1             | PITHD1             | -2.1 | 0    |
| CBR1L2             | CBR1L2             | -2.1 | 0    |
| SGTB               | SGTB               | -2.1 | 0.02 |
| PSMA4              | PSMA4_tv1          | -2.1 | 0    |
| EIF1AY             | ENSSSCG00000037509 | -2.1 | 0    |
| TTC1               | TTC1               | -2.1 | 0    |
| PDHB               | PDHB_tv1           | -2.1 | 0    |
| PIFOL*             | ENSSSCG00000035204 | -2.1 | 0.02 |
| LOC106506502       | ENSSSCG00000035160 | -2.1 | 0.01 |

|                    |                    |      |      |
|--------------------|--------------------|------|------|
| N4BP2L1            | N4BP2L1_tv1        | -2.1 | 0    |
| BCAP29             | BCAP29             | -2.1 | 0    |
| ZMPSTE24           | ZMPSTE24           | -2.1 | 0    |
| NXT2               | NXT2_tv1           | -2.1 | 0    |
| NUDT7              | NUDT7              | -2.1 | 0    |
| RNASE12            | RNASE12            | -2.1 | 0.02 |
| GIMAP5             | GIMAP5             | -2.1 | 0.02 |
| PNPT1              | PNPT1              | -2.1 | 0    |
| BCAS4              | BCAS4_tv2          | -2.1 | 0    |
| C16orf91           | C16orf91           | -2.1 | 0    |
| SASS6              | SASS6              | -2.1 | 0    |
| CYP11A1            | CYP11A1_tv1        | -2.1 | 0    |
| RFC4               | RFC4_tv1           | -2.1 | 0    |
| PANK3              | PANK3              | -2.1 | 0    |
| SMIM20             | ENSSSCG00000040571 | -2.1 | 0    |
| ZFAND6             | ZFAND6             | -2.1 | 0    |
| NMD3               | NMD3               | -2.1 | 0    |
| MRPL37             | MRPL37             | -2.1 | 0    |
| NXNL2              | NXNL2              | -2.1 | 0    |
| ENSSSCG00000047395 | ENSSSCG00000047395 | -2.1 | 0.05 |
| AASDHPPT           | AASDHPPT           | -2.1 | 0    |
| PPP1R1A            | PPP1R1A            | -2.1 | 0    |
| ODF2L              | ODF2L_tv4          | -2.1 | 0    |
| GAS2               | GAS2_tv3           | -2.1 | 0    |
| LOC100517973       | ENSSSCG00000040422 | -2.1 | 0    |
| LSM4               | LSM4_tv1           | -2.1 | 0    |
| TAF7L              | TAF7L              | -2.1 | 0    |
| OSTF1              | OSTF1              | -2.1 | 0    |
| LOC102166913       | ENSSSCG00000043103 | -2.1 | 0    |
| CEP55              | CEP55              | -2.1 | 0    |
| KCTD9              | KCTD9              | -2.1 | 0    |
| ASF1A              | ASF1A              | -2.1 | 0    |
| NTPCR              | NTPCR              | -2.1 | 0    |
| L3HYPDH            | L3HYPDH            | -2.1 | 0    |
| RPL15              | RPL15              | -2.1 | 0    |
| DRAM2              | DRAM2              | -2.1 | 0    |
| RER1               | RER1               | -2.1 | 0    |
| WDR76              | WDR76              | -2.1 | 0    |
| EIF2S3             | EIF2S3             | -2.1 | 0    |
| LYSMD4             | ENSSSCG00000030487 | -2.1 | 0    |
| COMMD3             | COMMD3             | -2.1 | 0    |
| UBA3               | UBA3               | -2.1 | 0    |
| LOC106506526       | ENSSSCG00000046259 | -2.1 | 0.05 |
| TMEM186            | TMEM186            | -2.1 | 0    |
| ZNF639             | ZNF639             | -2.1 | 0    |
| BTK                | BTK_tv1            | -2.1 | 0.01 |
| ZNF615             | ZNF615_tvX5        | -2.1 | 0.02 |

|              |                    |      |      |
|--------------|--------------------|------|------|
| EIF1AX       | EIF1AX             | -2.1 | 0    |
| PKD2L2       | PKD2L2             | -2.1 | 0.01 |
| SLC25A3      | SLC25A3            | -2.1 | 0    |
| PSMA8        | PSMA8              | -2.1 | 0.03 |
| UBA6         | UBA6               | -2.1 | 0    |
| LOC106507930 | ENSSSCG00000044691 | -2.1 | 0.03 |
| GET1         | GET1               | -2.1 | 0    |
| TAF10        | TAF10              | -2.1 | 0    |
| PRPF39       | PRPF39             | -2.1 | 0    |
| C5orf15      | C5orf15            | -2.1 | 0    |
| SLC4A4       | SLC4A4             | -2.1 | 0    |
| LVRN         | LVRN               | -2.1 | 0.03 |
| ALKBH7       | ALKBH7             | -2.1 | 0    |
| OSBP2        | OSBP2              | -2.1 | 0    |
| UBE2A        | UBE2A              | -2.1 | 0    |
| POLR2J       | ENSSSCG00000007688 | -2.1 | 0    |
| EIF6         | EIF6               | -2.1 | 0    |
| MYL2         | MYL2               | -2.1 | 0.01 |
| TFPI         | TFPI               | -2.1 | 0.02 |
| YOD1         | YOD1               | -2.1 | 0    |
| BLOC1S6      | BLOC1S6            | -2.1 | 0    |
| CCDC191      | CCDC191            | -2.1 | 0    |
| GTDC1        | GTDC1              | -2.1 | 0    |
| SCYL2        | SCYL2_tvX2         | -2.1 | 0    |
| ZMYM6NB      | ZMYM6NB            | -2.1 | 0    |
| ZFAND1       | ZFAND1             | -2.1 | 0    |
| RAD17        | RAD17              | -2.1 | 0    |
| CFAP97D1     | CFAP97D1           | -2.1 | 0.05 |
| CRISPLD1     | CRISPLD1           | -2.1 | 0    |
| PMVK         | PMVK_tv1           | -2.1 | 0.04 |
| PRDX5        | PRDX5              | -2.1 | 0    |
| NUP210L      | NUP210L            | -2.1 | 0    |
| TBC1D23      | TBC1D23            | -2.1 | 0    |
| KCNK2        | KCNK2              | -2.1 | 0    |
| C19orf81     | C19orf81           | -2.1 | 0.02 |
| UBE2B        | UBE2B              | -2.1 | 0    |
| NDUFAF4      | NDUFAF4            | -2.1 | 0    |
| ECHDC1       | ECHDC1             | -2.1 | 0    |
| ZNF596       | ZNF596             | -2.1 | 0    |
| PCMT1        | PCMT1              | -2.1 | 0    |
| TOMM6        | TOMM6              | -2.1 | 0    |
| TM2D1        | TM2D1              | -2.1 | 0    |
| KATNBL1      | KATNBL1            | -2.1 | 0    |
| CNOT7        | CNOT7              | -2.1 | 0    |
| DUOXA2       | DUOXA2             | -2.1 | 0.03 |
| RMI1         | RMI1               | -2.1 | 0    |
| MGAT4A       | MGAT4A             | -2.1 | 0    |

|                    |                    |      |      |
|--------------------|--------------------|------|------|
| TIMM10             | TIMM10             | -2.1 | 0    |
| MED4               | MED4               | -2.1 | 0    |
| ZDBF2              | ZDBF2              | -2.1 | 0.01 |
| ERI2               | ERI2_tv1           | -2.1 | 0.01 |
| AP5M1              | AP5M1_tv1          | -2.1 | 0.02 |
| TAF11              | ENSSSCG00000001533 | -2.1 | 0    |
| MIGA1              | MIGA1              | -2.1 | 0    |
| RPL18              | ENSSSCG00000025928 | -2.1 | 0    |
| PCCA               | PCCA_tv1           | -2.1 | 0    |
| EEF1B2             | EEF1B2             | -2.1 | 0    |
| ARMT1              | ARMT1_tv1          | -2.1 | 0    |
| GPN1               | GPN1               | -2.1 | 0    |
| NUF2               | NUF2               | -2.1 | 0    |
| CST9L              | CST9L              | -2.1 | 0    |
| COPS6              | COPS6              | -2.1 | 0    |
| CCNJ               | CCNJ               | -2.1 | 0.03 |
| ORC4               | ORC4               | -2.1 | 0    |
| CASC1              | CASC1              | -2.1 | 0    |
| SLC7A11            | SLC7A11            | -2.1 | 0    |
| EMC4               | EMC4               | -2.1 | 0    |
| UBA5               | UBA5_tv1           | -2.1 | 0    |
| C3orf38            | C3orf38            | -2.1 | 0    |
| TRIM13             | TRIM13             | -2.1 | 0    |
| GNPDA2             | GNPDA2             | -2.1 | 0    |
| SCPEP1             | SCPEP1             | -2.1 | 0    |
| PCNA               | PCNA               | -2.1 | 0    |
| PSMB4              | PSMB4              | -2.1 | 0    |
| EIF2B2             | EIF2B2             | -2.1 | 0    |
| RPL21              | RPL21              | -2.1 | 0    |
| MRPL24             | MRPL24             | -2.1 | 0    |
| UNK57*             | UNK57              | -2.1 | 0.03 |
| CENPQ              | CENPQ              | -2.1 | 0    |
| GEN1               | GEN1               | -2.1 | 0    |
| GLA                | GLA                | -2.1 | 0    |
| CNIH1              | CNIH1              | -2.1 | 0    |
| RBBP4              | RBBP4              | -2.1 | 0    |
| ZNF471             | ZNF471             | -2.1 | 0.03 |
| APOLD1             | APOLD1_tv2         | -2.1 | 0    |
| LMBRD1             | LMBRD1             | -2.1 | 0    |
| UNK156*            | ENSSSCG00000048074 | -2.1 | 0    |
| NDUFA8             | NDUFA8             | -2.1 | 0    |
| ENSSSCG00000048556 | ENSSSCG00000048556 | -2.1 | 0    |
| BTF3L4             | BTF3L4             | -2.1 | 0    |
| NDUFA4             | ENSSSCG00000024313 | -2.1 | 0    |
| RGS5               | RGS5               | -2.1 | 0    |
| FRG1               | ENSSSCG00000006996 | -2.1 | 0    |
| MRPL55             | MRPL55_tv1         | -2.1 | 0    |

|              |                    |      |      |
|--------------|--------------------|------|------|
| GTF2A2       | GTF2A2             | -2.1 | 0    |
| STRAP        | STRAP              | -2.1 | 0    |
| RPL10        | RPL10_tv1          | -2.1 | 0    |
| CLEC2D       | CLEC2D_tv1         | -2.1 | 0    |
| PSME2        | PSME2_tv1          | -2.1 | 0    |
| DARS         | DARS               | -2.1 | 0    |
| BCL2A1       | BCL2A1_tv1         | -2.1 | 0.01 |
| CCNYL1       | CCNYL1             | -2.1 | 0    |
| ZNF410       | ZNF410_tv2         | -2.1 | 0    |
| UCHL5        | UCHL5_tv1          | -2.1 | 0    |
| MYO5A        | MYO5A              | -2.1 | 0    |
| SEC22B       | SEC22B             | -2.1 | 0    |
| SLC25A51     | SLC25A51           | -2.1 | 0    |
| MRPL18       | MRPL18             | -2.1 | 0    |
| ANAPC7       | ANAPC7             | -2.1 | 0    |
| HTD2         | HTD2               | -2.1 | 0.02 |
| RPL35        | RPL35              | -2.1 | 0    |
| TAX1BP3      | TAX1BP3            | -2.1 | 0    |
| RPL21Ps2*    | ENSSSCG00000011688 | -2.1 | 0    |
| HMGCL        | HMGCL_tv1          | -2.1 | 0    |
| RIDA         | RIDA               | -2.1 | 0    |
| EIF3H        | EIF3H              | -2.1 | 0    |
| KRBOX4       | ENSSSCG00000049838 | -2.1 | 0.04 |
| POLB         | POLB               | -2.1 | 0    |
| MGARP        | MGARP              | -2.1 | 0    |
| SFT2D1       | SFT2D1             | -2.1 | 0    |
| TMEM50A      | TMEM50A            | -2.1 | 0    |
| LOC102160564 | ENSSSCG00000041434 | -2.1 | 0    |
| DCN          | DCN                | -2.1 | 0    |
| POLR2I       | POLR2I             | -2.1 | 0    |
| MUT          | MUT                | -2.1 | 0    |
| HNMT         | HNMT_tv1           | -2.1 | 0    |
| CCNE2        | CCNE2              | -2.1 | 0    |
| DPYS         | DPYS               | -2.1 | 0.03 |
| DYNLL1       | DYNLL1             | -2.1 | 0    |
| SBDS         | SBDS               | -2.1 | 0    |
| CHCHD1       | CHCHD1             | -2.1 | 0    |
| MAP6D1       | MAP6D1             | -2.1 | 0    |
| COA6         | ENSSSCG00000010161 | -2.1 | 0    |
| TRIM23       | TRIM23_tv1         | -2.1 | 0    |
| ZFP37        | ENSSSCG00000005475 | -2.1 | 0    |
| SEMA3A       | SEMA3A             | -2.1 | 0    |
| AK7          | AK7                | -2.1 | 0    |
| ZNF709L11*   | ZNF709L11*         | -2.1 | 0.03 |
| CASP4        | CASP4_tva          | -2.1 | 0    |
| RPL12        | RPL12              | -2.1 | 0    |
| NDUFB3       | NDUFB3             | -2.1 | 0    |

|                    |                    |      |      |
|--------------------|--------------------|------|------|
| CLPX               | CLPX_tv            | -2.1 | 0    |
| TSPAN31            | TSPAN31            | -2.1 | 0    |
| METTL9             | METTL9             | -2.1 | 0    |
| LIPA               | LIPA_tv2           | -2.1 | 0    |
| CD3G               | CD3G_tv1           | -2.1 | 0    |
| PRDX6              | PRDX6              | -2.1 | 0    |
| NDUFA7             | ENSSSCG00000041220 | -2.1 | 0    |
| TRAPPC4            | TRAPPC4            | -2.2 | 0    |
| PGLYRP2            | PGLYRP2            | -2.2 | 0.05 |
| ACTR3              | ACTR3_tv1          | -2.2 | 0    |
| ARPC5L             | ARPC5L             | -2.2 | 0    |
| KIAA1143           | KIAA1143           | -2.2 | 0    |
| TMEM59             | TMEM59             | -2.2 | 0    |
| RPLP2              | RPLP2              | -2.2 | 0    |
| C17orf75           | C17orf75           | -2.2 | 0    |
| ENSSSCG00000043997 | ENSSSCG00000043997 | -2.2 | 0    |
| ENSSSCG00000041012 | ENSSSCG00000041012 | -2.2 | 0.03 |
| C2orf76            | C2orf76            | -2.2 | 0    |
| SULT1C3            | ENSSSCG00000028691 | -2.2 | 0    |
| CCNDBP1            | CCNDBP1            | -2.2 | 0    |
| IMPA1              | IMPA1              | -2.2 | 0    |
| THOC5              | THOC5              | -2.2 | 0    |
| IFI44              | IFI44              | -2.2 | 0    |
| EFR3A              | EFR3A_tv1          | -2.2 | 0    |
| SGCE               | SGCE               | -2.2 | 0    |
| RRAS2              | ENSSSCG00000033786 | -2.2 | 0    |
| POLM               | ENSSSCG00000044483 | -2.2 | 0    |
| NRGN               | NRGN               | -2.2 | 0.01 |
| NDUFS2             | NDUFS2             | -2.2 | 0    |
| MIS18A             | MIS18A             | -2.2 | 0    |
| NOP16              | NOP16_tv3          | -2.2 | 0    |
| ENSSSCG00000049380 | ENSSSCG00000049380 | -2.2 | 0    |
| SLC30A6            | SLC30A6            | -2.2 | 0    |
| GPR34              | GPR34_tv1          | -2.2 | 0.01 |
| C3orf14            | C3orf14            | -2.2 | 0.03 |
| WSB1               | WSB1               | -2.2 | 0    |
| MDH1               | MDH1_tv2           | -2.2 | 0    |
| CCT2               | CCT2_tv1           | -2.2 | 0    |
| MAP3K7             | MAP3K7_tvb         | -2.2 | 0    |
| RPL34              | RPL34              | -2.2 | 0    |
| MTERF2             | MTERF2             | -2.2 | 0    |
| RPL7L1             | RPL7L1             | -2.2 | 0    |
| MPC2               | MPC2               | -2.2 | 0    |
| TMEM229A           | ENSSSCG00000044009 | -2.2 | 0    |
| SUCLA2             | SUCLA2_tv1         | -2.2 | 0    |
| S100A6             | S100A6             | -2.2 | 0    |
| DEPDC1             | DEPDC1_tv1         | -2.2 | 0    |



|                    |                     |      |      |
|--------------------|---------------------|------|------|
| PPDPF              | ENSSSCG00000040118  | -2.2 | 0.04 |
| GHRL               | GHRL                | -2.2 | 0    |
| ENSSSCG00000044123 | ENSSSCG00000044123  | -2.2 | 0.02 |
| FAM216A            | FAM216A             | -2.2 | 0.01 |
| ALB                | ALB_tv              | -2.2 | 0    |
| TMBIM4             | TMBIM4_tv2          | -2.2 | 0    |
| IFRD2              | IFRD2               | -2.2 | 0    |
| SRXN1              | SRXN1               | -2.2 | 0    |
| GPBP1              | GPBP1_tv1           | -2.2 | 0    |
| PSTK               | PSTK                | -2.2 | 0    |
| PLBD1              | PLBD1               | -2.2 | 0    |
| RPL23              | RPL23               | -2.2 | 0    |
| PSMD10             | PSMD10              | -2.2 | 0    |
| PSMB7              | PSMB7               | -2.2 | 0    |
| CDK1               | CDK1_tv1            | -2.2 | 0    |
| SLC25A13           | SLC25A13_tv2        | -2.2 | 0    |
| DNAJC12            | DNAJC12             | -2.2 | 0    |
| SNX5               | ENSSSCG00000007088  | -2.2 | 0    |
| ZBTB6              | ZBTB6               | -2.2 | 0    |
| SENP8              | SENP8               | -2.2 | 0    |
| C4BPAL*            | C4BPAL*             | -2.2 | 0    |
| UOX                | UOX                 | -2.2 | 0    |
| FBXO22             | FBXO22              | -2.2 | 0    |
| CHUK               | CHUK                | -2.2 | 0    |
| SULT2A1            | SULT2A1             | -2.2 | 0    |
| ARPC2              | ARPC2               | -2.2 | 0    |
| TRIM33             | TRIM33_tv           | -2.2 | 0    |
| PDCD4              | PDCD4               | -2.2 | 0    |
| PSMB2              | PSMB2_tv1           | -2.2 | 0    |
| SEC22A             | SEC22A              | -2.2 | 0    |
| UBXN8              | UBXN8               | -2.2 | 0    |
| LIN9               | LIN9_tv1            | -2.2 | 0    |
| COMMD10            | COMMD10             | -2.2 | 0    |
| CASP3              | CASP3_tvb           | -2.2 | 0    |
| TMEM106C           | TMEM106C            | -2.2 | 0    |
| GABARAPL2          | GABARAPL2           | -2.2 | 0    |
| lncRNA             | lncRNA              | -2.2 | 0.02 |
| TM4SF18            | TM4SF18             | -2.2 | 0    |
| EIF5A2             | EIF5A2              | -2.2 | 0    |
| SH3BGRL2           | SH3BGRL2            | -2.2 | 0    |
| SRP14              | SRP14               | -2.2 | 0    |
| CHURC1             | CHURC1              | -2.2 | 0    |
| PSPN               | PSPN                | -2.2 | 0.04 |
| C18orf32           | ENSSSCG000000034415 | -2.2 | 0    |
| SMNDC1             | SMNDC1              | -2.2 | 0    |
| SNRPD2             | SNRPD2              | -2.2 | 0    |
| SIAE               | SIAE_tv1            | -2.2 | 0    |

|              |                     |      |      |
|--------------|---------------------|------|------|
| H1-3         | H1-3                | -2.2 | 0    |
| PSMA3        | PSMA3_tv1           | -2.2 | 0    |
| RPS27A       | RPS27A              | -2.2 | 0    |
| LOC102165926 | ENSSSCG00000044342  | -2.2 | 0.04 |
| FKBP3        | FKBP3_tv1           | -2.2 | 0    |
| AAGAB        | AAGAB_tv1           | -2.2 | 0    |
| PEBP1        | ENSSSCG00000009851  | -2.2 | 0    |
| COMMD8       | COMMD8              | -2.2 | 0    |
| C4orf3       | ENSSSCG000000031773 | -2.2 | 0    |
| SAT1         | SAT1_tv1            | -2.2 | 0    |
| AP1S3_tv1    | AP1S3_tv1           | -2.2 | 0.04 |
| CSE1L        | CSE1L_tv            | -2.2 | 0    |
| SPRYD4       | SPRYD4              | -2.2 | 0    |
| TRHDE        | TRHDE               | -2.2 | 0    |
| CHCHD5       | CHCHD5              | -2.2 | 0    |
| MFN1         | MFN1                | -2.2 | 0    |
| BTG3         | BTG3_tv2            | -2.2 | 0    |
| RPS4X        | RPS4X               | -2.2 | 0    |
| CGRRF1       | CGRRF1              | -2.2 | 0    |
| ZNF22        | ZNF22               | -2.2 | 0    |
| MAG          | MAG                 | -2.2 | 0.01 |
| MRPS31       | MRPS31              | -2.2 | 0    |
| MTFR1        | MTFR1               | -2.2 | 0    |
| TRMT61B      | TRMT61B             | -2.2 | 0    |
| RFC3         | RFC3                | -2.2 | 0    |
| HGD          | HGD                 | -2.2 | 0.05 |
| TUBD1        | TUBD1               | -2.2 | 0    |
| RPS3A        | RPS3A               | -2.2 | 0    |
| CAV2         | CAV2                | -2.2 | 0    |
| BOLA3        | BOLA3               | -2.2 | 0    |
| TAF1D        | TAF1D               | -2.2 | 0    |
| VBP1         | VBP1                | -2.2 | 0    |
| LOC100155572 | ENSSSCG00000002045  | -2.2 | 0    |
| TSTD3        | ENSSSCG00000038757  | -2.2 | 0    |
| RPSA         | RPSA                | -2.2 | 0    |
| COL12A1      | COL12A1             | -2.2 | 0    |
| TYW3         | TYW3                | -2.2 | 0    |
| LOC106507125 | ENSSSCG00000045495  | -2.2 | 0    |
| SLC30A9      | SLC30A9             | -2.2 | 0    |
| RPL38        | RPL38               | -2.2 | 0    |
| DTD2         | DTD2                | -2.2 | 0    |
| ATP6V1D      | ATP6V1D             | -2.2 | 0    |
| CCT8         | CCT8                | -2.2 | 0    |
| RHOH         | RHOH_tv4            | -2.2 | 0.05 |
| COQ7         | COQ7                | -2.2 | 0    |
| ZBTB8OS      | ZBTB8OS             | -2.2 | 0    |
| ACAT1        | ACAT1_tv            | -2.2 | 0    |

|                    |                    |      |      |
|--------------------|--------------------|------|------|
| TRIQK              | TRIQK              | -2.2 | 0    |
| PLK2               | PLK2               | -2.2 | 0.01 |
| CST15              | ENSSSCG00000007123 | -2.2 | 0    |
| NDUFB6             | NDUFB6             | -2.2 | 0    |
| HSD17B4            | HSD17B4_tv2        | -2.2 | 0    |
| MTHFD2             | MTHFD2_tv1         | -2.2 | 0    |
| DSTN               | DSTN_tv1           | -2.2 | 0    |
| BZW1               | BZW1               | -2.2 | 0    |
| MRPL27             | MRPL27             | -2.2 | 0    |
| BST2               | BST2_tv1           | -2.2 | 0    |
| DPH3P1             | DPH3P1             | -2.2 | 0    |
| UBE2T              | UBE2T              | -2.2 | 0.05 |
| PGM3               | PGM3               | -2.2 | 0    |
| GSTA1              | GSTA1_tv1          | -2.2 | 0    |
| H3F3B              | H3F3B              | -2.2 | 0    |
| EIF3E              | EIF3E              | -2.2 | 0    |
| RAB2A              | RAB2A_tv1          | -2.2 | 0    |
| ENSSSCG00000000359 | ENSSSCG00000000359 | -2.2 | 0    |
| MRPL47             | MRPL47             | -2.2 | 0    |
| BDH2               | BDH2               | -2.2 | 0    |
| DPY30              | DPY30              | -2.2 | 0    |
| FUNDC1             | FUNDC1             | -2.2 | 0    |
| NAE1               | NAE1               | -2.2 | 0    |
| PAGE2BL*           | ENSSSCG00000049886 | -2.2 | 0.03 |
| ENSSSCG00000045922 | ENSSSCG00000045922 | -2.2 | 0    |
| CEP85L             | CEP85L             | -2.2 | 0    |
| COX15              | COX15              | -2.2 | 0    |
| SOC55              | SOC55              | -2.3 | 0    |
| ZBTB26             | ZBTB26             | -2.3 | 0    |
| HSPA14             | HSPA14_tv1         | -2.3 | 0    |
| NUDT12             | NUDT12             | -2.3 | 0    |
| TATDN3             | TATDN3             | -2.3 | 0    |
| CYP39A1            | CYP39A1_tv1        | -2.3 | 0    |
| COX11              | COX11_tv1          | -2.3 | 0    |
| PARK7              | PARK7              | -2.3 | 0    |
| POLR2K             | POLR2K             | -2.3 | 0    |
| RPL22              | RPL22              | -2.3 | 0    |
| NIPA2              | NIPA2_tv1          | -2.3 | 0.01 |
| CSNK1A1L           | CSNK1A1L_tv1       | -2.3 | 0.05 |
| PTTG1              | ENSSSCG00000017032 | -2.3 | 0    |
| AIF1               | AIF1_tv3           | -2.3 | 0    |
| CLDND1             | CLDND1             | -2.3 | 0    |
| SLC35F4            | SLC35F4            | -2.3 | 0    |
| CYP51A1            | CYP51A1_tv1        | -2.3 | 0    |
| C18orf21           | C18orf21           | -2.3 | 0    |
| ZNF706             | ZNF706             | -2.3 | 0    |
| ATP6V1F            | ATP6V1F            | -2.3 | 0    |

|                    |                    |      |      |
|--------------------|--------------------|------|------|
| RPS17              | RPS17              | -2.3 | 0    |
| RTCA               | RTCA               | -2.3 | 0    |
| CFAP20             | CFAP20             | -2.3 | 0    |
| GYG1               | GYG1_tv2           | -2.3 | 0.02 |
| DUT                | DUT                | -2.3 | 0    |
| HSD17B8            | HSD17B8            | -2.3 | 0    |
| MZT1               | MZT1               | -2.3 | 0    |
| NMRK1              | NMRK1              | -2.3 | 0    |
| TDG                | TDG                | -2.3 | 0    |
| MRPL17             | MRPL17             | -2.3 | 0    |
| MYNN               | MYNN               | -2.3 | 0    |
| CMPK1              | CMPK1              | -2.3 | 0    |
| ENSSSCG00000045093 | ENSSSCG00000045093 | -2.3 | 0.01 |
| PSMD14             | PSMD14             | -2.3 | 0    |
| TRAV18             | ENSSSCG00000040548 | -2.3 | 0.03 |
| RAP1GAP            | RAP1GAP            | -2.3 | 0    |
| PSPH               | PSPH               | -2.3 | 0.04 |
| RCHY1              | RCHY1              | -2.3 | 0    |
| CYP4B1             | CYP4B1             | -2.3 | 0    |
| ENY2               | ENY2_tv1           | -2.3 | 0    |
| RPL36AL            | RPL36AL_tv         | -2.3 | 0    |
| CLN5               | ENSSSCG00000031288 | -2.3 | 0    |
| ROGDI              | ROGDI              | -2.3 | 0    |
| TBC1D15            | TBC1D15            | -2.3 | 0    |
| BLVRA              | BLVRA_tv           | -2.3 | 0    |
| IAH1               | IAH1               | -2.3 | 0    |
| EXD1               | EXD1               | -2.3 | 0    |
| ANXA1              | ANXA1_tv1          | -2.3 | 0    |
| KLHL7              | KLHL7_tv1          | -2.3 | 0    |
| ENSSSCG00000042997 | ENSSSCG00000042997 | -2.3 | 0    |
| TLR1               | TLR1               | -2.3 | 0    |
| SAXO2              | SAXO2              | -2.3 | 0.04 |
| THAP1              | THAP1              | -2.3 | 0    |
| SOAT1              | SOAT1_tv1          | -2.3 | 0    |
| DERA               | DERA               | -2.3 | 0    |
| KYAT3              | KYAT3              | -2.3 | 0    |
| PFDN4              | PFDN4              | -2.3 | 0    |
| TMEM183A           | TMEM183A           | -2.3 | 0    |
| FDX1               | FDX1               | -2.3 | 0    |
| ENSSSCG00000041281 | ENSSSCG00000041281 | -2.3 | 0    |
| PDHX               | PDHX_tv1           | -2.3 | 0    |
| ACTR10             | ACTR10             | -2.3 | 0    |
| MAGOHB             | MAGOHB             | -2.3 | 0    |
| ESCO2              | ENSSSCG00000009670 | -2.3 | 0    |
| LOC106510665       | ENSSSCG00000051754 | -2.3 | 0    |
| METAP2             | METAP2             | -2.3 | 0    |
| CKS2               | CKS2               | -2.3 | 0    |

|                    |                    |      |      |
|--------------------|--------------------|------|------|
| RPS13              | RPS13              | -2.3 | 0    |
| SLC35A1            | SLC35A1            | -2.3 | 0    |
| EXOSC8             | EXOSC8             | -2.3 | 0    |
| CTSC               | CTSC_tv1           | -2.3 | 0    |
| STK17B             | STK17B             | -2.3 | 0    |
| GEMIN2             | GEMIN2             | -2.3 | 0    |
| SPCS1              | SPCS1              | -2.3 | 0    |
| TMEM147            | TMEM147            | -2.3 | 0    |
| POLR2G             | POLR2G             | -2.3 | 0    |
| PCCB               | PCCB               | -2.3 | 0    |
| AMZ2               | AMZ2               | -2.3 | 0    |
| PPT1               | PPT1               | -2.3 | 0    |
| ANAPC4             | ANAPC4             | -2.3 | 0.03 |
| ITM2B              | ITM2B              | -2.3 | 0    |
| CCT4               | CCT4               | -2.3 | 0    |
| RBBP7              | RBBP7              | -2.3 | 0    |
| CCDC32             | CCDC32             | -2.3 | 0    |
| EBAG9              | EBAG9_tv2          | -2.3 | 0.01 |
| TFB2M              | TFB2M              | -2.3 | 0    |
| NUDT15             | NUDT15             | -2.3 | 0    |
| MRPL1              | MRPL1              | -2.3 | 0    |
| CASP6              | CASP6_tva          | -2.3 | 0    |
| TMEM144            | TMEM144            | -2.3 | 0    |
| ERO1B              | ERO1B              | -2.3 | 0    |
| AMN1               | AMN1               | -2.3 | 0    |
| FAHD2A             | FAHD2A             | -2.3 | 0    |
| ENSSSCG00000051580 | ENSSSCG00000051580 | -2.3 | 0    |
| CNPY2              | ENSSSCG00000000394 | -2.3 | 0    |
| GLOD4              | GLOD4_tv1          | -2.3 | 0    |
| NDUFA5             | NDUFA5             | -2.3 | 0    |
| SMIM15             | SMIM15             | -2.3 | 0    |
| PSMA1              | PSMA1_tv2          | -2.3 | 0    |
| GRIK1              | GRIK1              | -2.3 | 0    |
| GIN1               | GIN1               | -2.3 | 0    |
| PECR               | PECR               | -2.3 | 0    |
| MAP1LC3B           | MAP1LC3B           | -2.3 | 0    |
| ATP6V1E1           | ATP6V1E1           | -2.3 | 0    |
| TMEM14A            | TMEM14A            | -2.3 | 0    |
| ERH                | ERH                | -2.3 | 0    |
| LAGE3              | ENSSSCG00000032959 | -2.3 | 0    |
| NCF4               | NCF4_tv1           | -2.3 | 0    |
| SMU1               | SMU1               | -2.3 | 0    |
| TANK               | TANK_tv1           | -2.3 | 0    |
| LOC106505126       | ENSSSCG00000051707 | -2.3 | 0    |
| TPRKB              | TPRKB              | -2.3 | 0    |
| C12orf29           | C12orf29           | -2.3 | 0    |
| CP                 | CP                 | -2.3 | 0    |

|          |                     |      |      |
|----------|---------------------|------|------|
| TMEM100  | TMEM100             | -2.3 | 0    |
| ELMOD2   | ELMOD2_tv1          | -2.3 | 0    |
| FCF1     | FCF1                | -2.3 | 0    |
| ATP6V1G1 | ATP6V1G1            | -2.3 | 0    |
| SMIM7    | SMIM7               | -2.3 | 0    |
| LSM8     | LSM8                | -2.3 | 0    |
| RAMAC    | ENSSSCG00000038630  | -2.3 | 0    |
| FAM133A  | FAM133A             | -2.3 | 0    |
| ESD      | ESD                 | -2.3 | 0    |
| SLITRK6  | SLITRK6             | -2.3 | 0    |
| DBI      | DBI                 | -2.3 | 0    |
| CYP19A3* | CYP19A3*            | -2.3 | 0    |
| UAP1     | UAP1                | -2.3 | 0    |
| LYRM1    | LYRM1               | -2.3 | 0    |
| PPP2R3C  | PPP2R3C             | -2.3 | 0    |
| TST      | TST_tv1             | -2.4 | 0    |
| FECH     | FECH                | -2.4 | 0    |
| TMEM128  | TMEM128             | -2.4 | 0    |
| IPMK     | IPMK                | -2.4 | 0    |
| HSPA13   | HSPA13              | -2.4 | 0    |
| NPTN     | NPTN_tva            | -2.4 | 0.03 |
| ATP1B3   | ATP1B3              | -2.4 | 0    |
| SLC30A8  | SLC30A8             | -2.4 | 0    |
| ZNF345   | ZNF345_tv1          | -2.4 | 0.01 |
| SFXN3    | SFXN3               | -2.4 | 0    |
| C6orf120 | C6orf120            | -2.4 | 0    |
| RPL32    | RPL32_tv1           | -2.4 | 0    |
| ADAMTS1  | ADAMTS1             | -2.4 | 0.02 |
| PCBD1    | PCBD1               | -2.4 | 0    |
| MSRB1    | MSRB1               | -2.4 | 0    |
| CCNC     | CCNC                | -2.4 | 0    |
| TSPAN13  | TSPAN13             | -2.4 | 0    |
| SLC6A2   | SLC6A2              | -2.4 | 0.04 |
| JTB      | ENSSSCG00000006559  | -2.4 | 0    |
| TLR6     | TLR6                | -2.4 | 0.01 |
| PSMD5    | PSMD5_tv            | -2.4 | 0    |
| MT-CO1   | MT-CO1              | -2.4 | 0    |
| ADH5     | ADH5                | -2.4 | 0    |
| FAM200B  | ENSSSCG000000041490 | -2.4 | 0    |
| CBR3     | CBR3                | -2.4 | 0    |
| INO80C   | INO80C              | -2.4 | 0    |
| H2AZ2    | H2AZ2               | -2.4 | 0    |
| TMSB10   | TMSB10              | -2.4 | 0    |
| POPDC3   | POPDC3              | -2.4 | 0.01 |
| C11orf1  | C11orf1             | -2.4 | 0    |
| VPS26A   | VPS26A_tv1          | -2.4 | 0    |
| ANAPC16  | ANAPC16_tv2         | -2.4 | 0.01 |

|                    |                     |      |      |
|--------------------|---------------------|------|------|
| C5orf30            | C5orf30             | -2.4 | 0    |
| SLC39A8            | SLC39A8_tv2         | -2.4 | 0    |
| SPATA24            | SPATA24             | -2.4 | 0    |
| IFIH1              | IFIH1               | -2.4 | 0    |
| OGFRL1             | OGFRL1              | -2.4 | 0.01 |
| SPCS3              | SPCS3               | -2.4 | 0    |
| GGTA1              | GGTA1_tv1           | -2.4 | 0    |
| TOMM5L*            | ENSSSCG00000043481  | -2.4 | 0.02 |
| PPFIA2             | PPFIA2              | -2.4 | 0    |
| NPL                | NPL                 | -2.4 | 0    |
| LOC100627892       | LOC100627892_tv1    | -2.4 | 0    |
| HSCB               | HSCB                | -2.4 | 0    |
| ASNA1              | ASNA1               | -2.4 | 0    |
| HGF                | HGF_tv1             | -2.4 | 0    |
| ATP5PB             | ATP5PB              | -2.4 | 0    |
| RPS25              | ENSSSCG00000036296  | -2.4 | 0    |
| MYL7               | MYL7                | -2.4 | 0    |
| WDR61              | WDR61_tv2           | -2.4 | 0    |
| PDCD1LG2           | PDCD1LG2            | -2.4 | 0    |
| TIMM8B             | TIMM8B              | -2.4 | 0    |
| GADL1              | GADL1               | -2.4 | 0.01 |
| CDKN2AIPNL         | CDKN2AIPNL          | -2.4 | 0    |
| "MARCH7"           | MARCH7_tvX1         | -2.4 | 0    |
| C11orf58           | C11orf58            | -2.4 | 0    |
| LYVE1              | LYVE1               | -2.4 | 0    |
| ENSSSCG00000002459 | ENSSSCG00000002459  | -2.4 | 0    |
| SNX3               | SNX3                | -2.4 | 0    |
| TIMM9              | TIMM9_tv1           | -2.4 | 0    |
| PDIK1L             | PDIK1L              | -2.4 | 0    |
| PCDH15             | PCDH15_tvP          | -2.4 | 0    |
| QRSL1              | QRSL1               | -2.4 | 0    |
| LncRNA             | LncRNA              | -2.4 | 0    |
| SNX4               | SNX4                | -2.4 | 0    |
| TXNL1              | TXNL1               | -2.4 | 0    |
| APIP               | APIP_tv1            | -2.4 | 0    |
| TMEM242            | TMEM242             | -2.4 | 0    |
| COPS9              | ENSSSCG000000020790 | -2.4 | 0    |
| MIS12              | MIS12_tv3           | -2.4 | 0    |
| TRMT5              | TRMT5               | -2.4 | 0    |
| BOLA2              | BOLA2               | -2.4 | 0    |
| LUZP2              | LUZP2               | -2.4 | 0    |
| FNIP2              | FNIP2               | -2.4 | 0    |
| C1QBP              | C1QBP               | -2.4 | 0    |
| UNK18*             | UNK18               | -2.4 | 0.01 |
| CCDC110            | ENSSSCG000000015795 | -2.4 | 0.01 |
| C4BPA              | C4BPA_tv1           | -2.4 | 0.03 |
| MRPL15             | MRPL15              | -2.4 | 0    |

|              |                    |      |      |
|--------------|--------------------|------|------|
| RPL14        | ENSSSCG00000011272 | -2.4 | 0    |
| TMEM69       | TMEM69             | -2.4 | 0    |
| RBX1         | ENSSSCG00000034230 | -2.4 | 0    |
| PSMB1        | PSMB1              | -2.4 | 0    |
| ACTR6        | ACTR6              | -2.4 | 0    |
| MPC1         | MPC1               | -2.4 | 0    |
| PBK          | PBK                | -2.4 | 0    |
| ZNF32        | ZNF32              | -2.4 | 0    |
| NDUFB8       | NDUFB8             | -2.4 | 0    |
| IFIT1        | IFIT1_tv1          | -2.4 | 0    |
| RABL3        | RABL3              | -2.4 | 0    |
| COMMD2       | COMMD2             | -2.4 | 0    |
| SNRPG        | SNRPG              | -2.4 | 0    |
| NDUFS1       | NDUFS1             | -2.4 | 0    |
| NDUFA13      | NDUFA13            | -2.4 | 0    |
| SCCPDH       | SCCPDH             | -2.4 | 0    |
| H4C9         | H4C9               | -2.4 | 0    |
| STAR         | STAR               | -2.4 | 0    |
| RPS2Ps*      | ENSSSCG00000017377 | -2.4 | 0    |
| LOC106504207 | ENSSSCG00000041986 | -2.4 | 0.04 |
| DNAJC28      | DNAJC28            | -2.4 | 0    |
| VPS29        | VPS29              | -2.4 | 0    |
| UBL5         | UBL5               | -2.4 | 0    |
| PAIP1        | PAIP1              | -2.4 | 0    |
| KIAA2012     | KIAA2012           | -2.4 | 0    |
| LCA5         | LCA5_tv1           | -2.4 | 0    |
| PTP4A1       | PTP4A1             | -2.4 | 0    |
| RPS15        | RPS15              | -2.4 | 0    |
| FABP3        | FABP3              | -2.4 | 0    |
| TMEM61       | TMEM61             | -2.5 | 0    |
| FOXRED1      | FOXRED1_tv1        | -2.5 | 0.02 |
| UBE2N        | UBE2N              | -2.5 | 0    |
| MRPS18C      | MRPS18C            | -2.5 | 0    |
| RPS4XPs*     | ENSSSCG00000022191 | -2.5 | 0    |
| DMAC2L       | DMAC2L             | -2.5 | 0    |
| CTSS         | CTSS_tv1           | -2.5 | 0    |
| NIT2         | NIT2               | -2.5 | 0    |
| SAMD9_tv2    | SAMD9_tv2          | -2.5 | 0    |
| CST6         | CST6               | -2.5 | 0    |
| FAM96A       | FAM96A_tv1         | -2.5 | 0    |
| RPS28        | RPS28              | -2.5 | 0    |
| OSGEPL1      | OSGEPL1            | -2.5 | 0    |
| NAMPT        | NAMPT              | -2.5 | 0    |
| NSUN3        | NSUN3              | -2.5 | 0    |
| MAL2         | MAL2               | -2.5 | 0    |
| PPP1CC       | PPP1CC_tv1         | -2.5 | 0    |
| FAM162A      | FAM162A            | -2.5 | 0    |



|                    |                    |      |      |
|--------------------|--------------------|------|------|
| NDUFB4             | NDUFB4_tv1         | -2.5 | 0    |
| ZNF529             | ZNF529_tv1         | -2.5 | 0    |
| EIF4A2             | EIF4A2             | -2.5 | 0    |
| RMDN1              | RMDN1              | -2.5 | 0    |
| COX7C              | COX7C              | -2.5 | 0    |
| NCAM2              | NCAM2_tv1          | -2.5 | 0    |
| MT-ND5             | MT-ND5             | -2.5 | 0    |
| RNF181             | RNF181             | -2.5 | 0    |
| LSM5               | ENSSSCG00000026064 | -2.5 | 0    |
| UQCRFS1            | UQCRFS1            | -2.5 | 0    |
| LAPTM4A            | LAPTM4A            | -2.5 | 0    |
| ASTE1              | ASTE1              | -2.5 | 0    |
| CHEK2              | CHEK2              | -2.5 | 0    |
| FYTTD1             | FYTTD1             | -2.5 | 0    |
| TIMM23             | TIMM23_tv1         | -2.5 | 0    |
| TPMT               | TPMT               | -2.5 | 0.01 |
| THAP6              | THAP6              | -2.5 | 0    |
| TOB1               | TOB1_tv1           | -2.5 | 0    |
| KRT10              | KRT10              | -2.5 | 0    |
| LOC100626258       | ENSSSCG00000044256 | -2.5 | 0    |
| ATOX1              | ATOX1              | -2.5 | 0    |
| NADK2              | NADK2              | -2.5 | 0    |
| RPL23A             | RPL23A             | -2.5 | 0    |
| ATMIN              | ATMIN_tv1          | -2.5 | 0.02 |
| ITPA               | ITPA               | -2.5 | 0    |
| ABITRAM            | ABITRAM            | -2.5 | 0    |
| MRPS25             | MRPS25             | -2.5 | 0    |
| ME1                | ME1                | -2.5 | 0    |
| GPN3               | GPN3               | -2.5 | 0    |
| HINT3              | HINT3              | -2.5 | 0    |
| ZNF711             | ZNF711             | -2.5 | 0    |
| VDAC2              | VDAC2              | -2.5 | 0    |
| GPR171             | GPR171             | -2.5 | 0.03 |
| METTL18            | METTL18            | -2.5 | 0    |
| DRG1               | DRG1               | -2.5 | 0    |
| CRYZ               | CRYZ               | -2.5 | 0    |
| JADE3              | JADE3              | -2.5 | 0    |
| TMEM243            | TMEM243            | -2.5 | 0    |
| B2M                | B2M                | -2.5 | 0    |
| CD36               | CD36_tvX1          | -2.5 | 0.01 |
| GINM1              | GINM1              | -2.5 | 0    |
| HSDL2              | HSDL2              | -2.5 | 0    |
| ZNF658             | ZNF658             | -2.5 | 0    |
| CCK                | CCK_tv1            | -2.5 | 0    |
| UFM1               | UFM1               | -2.5 | 0    |
| CTNNB1             | CTNNB1_tv1         | -2.5 | 0    |
| ENSSSCG00000037067 | ENSSSCG00000037067 | -2.5 | 0.01 |

|                    |                    |      |      |
|--------------------|--------------------|------|------|
| TMEM126B           | TMEM126B           | -2.5 | 0    |
| HSD17B12           | HSD17B12           | -2.5 | 0    |
| SUMO2              | SUMO2              | -2.5 | 0    |
| KLHL41             | KLHL41             | -2.5 | 0    |
| ZNF684L            | ZNF684L            | -2.5 | 0    |
| VTA1               | VTA1               | -2.5 | 0    |
| ZNF501             | ZNF501_tv1         | -2.5 | 0    |
| EIF2S1             | EIF2S1             | -2.5 | 0    |
| EIF3I              | EIF3I              | -2.5 | 0    |
| MBIP               | MBIP               | -2.5 | 0    |
| C9                 | C9                 | -2.5 | 0.01 |
| COQ3               | COQ3_tv1           | -2.5 | 0    |
| GSTO1              | GSTO1              | -2.5 | 0    |
| TMEM230Ps*         | ENSSSCG00000035546 | -2.5 | 0    |
| PBLD               | PBLD               | -2.5 | 0    |
| CFAP43             | CFAP43             | -2.5 | 0    |
| RBM7               | ENSSSCG00000027905 | -2.5 | 0    |
| TMEM256            | ENSSSCG00000037071 | -2.5 | 0    |
| SNX16              | SNX16              | -2.5 | 0    |
| PSMC6              | PSMC6              | -2.5 | 0    |
| TMEM263            | TMEM263            | -2.5 | 0    |
| PRDX2              | PRDX2              | -2.5 | 0    |
| SFR1               | SFR1               | -2.5 | 0    |
| CAMTA1             | CAMTA1_tv2         | -2.5 | 0    |
| DNAJA1             | DNAJA1             | -2.5 | 0    |
| UBQLN1             | UBQLN1_tv1         | -2.5 | 0    |
| CNEP1R1            | CNEP1R1_tv2        | -2.5 | 0    |
| MRPL34             | MRPL34             | -2.5 | 0    |
| BDKRB1             | BDKRB1_tv          | -2.5 | 0.04 |
| MRPL46             | MRPL46             | -2.5 | 0    |
| PDK4               | PDK4               | -2.6 | 0    |
| LncRNA             | LncRNA             | -2.6 | 0    |
| OSTC               | OSTC               | -2.6 | 0    |
| ATP5F1BPs*         | ATP5F1BPs*         | -2.6 | 0    |
| ENSSSCG00000049265 | ENSSSCG00000049265 | -2.6 | 0    |
| GNG10              | GNG10_tv1          | -2.6 | 0    |
| HSD11B1L           | HSD11B1L           | -2.6 | 0    |
| MRPL45             | MRPL45             | -2.6 | 0    |
| LOC110256941       | ENSSSCG00000050742 | -2.6 | 0.01 |
| PCBD2              | ENSSSCG00000026229 | -2.6 | 0    |
| MICOS13            | MICOS13            | -2.6 | 0    |
| MGAT4C             | MGAT4C             | -2.6 | 0    |
| TOMM22             | ENSSSCG00000000097 | -2.6 | 0    |
| MRO                | MRO                | -2.6 | 0    |
| FBXO8              | FBXO8              | -2.6 | 0    |
| CDKL2              | CDKL2              | -2.6 | 0    |
| STMN1              | STMN1              | -2.6 | 0    |

|                    |                    |      |      |
|--------------------|--------------------|------|------|
| NUBPL              | NUBPL              | -2.6 | 0    |
| VDAC3              | VDAC3              | -2.6 | 0    |
| ARHGAP15           | ARHGAP15_tv1       | -2.6 | 0    |
| NOP10              | NOP10              | -2.6 | 0    |
| XKR9               | XKR9               | -2.6 | 0.02 |
| RNFT1              | RNFT1              | -2.6 | 0    |
| VAMP7              | VAMP7              | -2.6 | 0    |
| CCNG2              | CCNG2              | -2.6 | 0    |
| PRORS1             | ENSSSCG00000037399 | -2.6 | 0    |
| CLECL1             | CLECL1_tv1         | -2.6 | 0    |
| CYCS               | CYCS               | -2.6 | 0    |
| NUDT2              | NUDT2              | -2.6 | 0    |
| PNO1               | PNO1               | -2.6 | 0    |
| FAM227B            | FAM227B            | -2.6 | 0    |
| ZNF277             | ZNF277             | -2.6 | 0    |
| THOC7              | THOC7              | -2.6 | 0    |
| SLC16A6            | SLC16A6            | -2.6 | 0.02 |
| RPS18Ps*           | ENSSSCG00000008767 | -2.6 | 0    |
| TXNDC9             | TXNDC9             | -2.6 | 0    |
| DPM1               | DPM1               | -2.6 | 0    |
| CMSS1              | CMSS1_tv1          | -2.6 | 0    |
| NDUFA6             | NDUFA6             | -2.6 | 0    |
| MPZL3              | MPZL3              | -2.6 | 0.01 |
| IMMP1L             | IMMP1L             | -2.6 | 0    |
| SDHC               | SDHC_tv1           | -2.6 | 0    |
| PCLAF              | PCLAF_tv1          | -2.6 | 0    |
| RRM2B              | RRM2B_tv1          | -2.6 | 0    |
| ENSSSCG00000044841 | ENSSSCG00000044841 | -2.6 | 0    |
| NDUFAF8            | NDUFAF8            | -2.6 | 0    |
| GPR156             | GPR156             | -2.6 | 0    |
| CETN2              | ENSSSCG00000012757 | -2.6 | 0    |
| SUCLG2             | SUCLG2_tv2         | -2.6 | 0    |
| PCGF6              | PCGF6_tv1          | -2.6 | 0    |
| UBE2L3             | UBE2L3_tv1         | -2.6 | 0    |
| SEC61G             | SEC61G_tv1         | -2.6 | 0    |
| MIR9810            | MIR9810            | -2.6 | 0    |
| SLC44A5            | SLC44A5_tv2        | -2.6 | 0    |
| THAP5              | THAP5              | -2.6 | 0    |
| EIF2B1Ps*          | ENSSSCG00000016241 | -2.6 | 0    |
| CISD2              | CISD2              | -2.6 | 0    |
| IL20RB             | IL20RB             | -2.6 | 0.01 |
| ND6                | ND6                | -2.6 | 0    |
| PCNAPs*            | ENSSSCG00000031854 | -2.6 | 0    |
| SELENOP            | SELENOP            | -2.6 | 0    |
| LDHA               | LDHA               | -2.6 | 0    |
| BORCS7             | BORCS7             | -2.6 | 0    |
| ENSSSCG00000043846 | ENSSSCG00000043846 | -2.6 | 0    |

|                    |                    |      |      |
|--------------------|--------------------|------|------|
| SNRPE              | SNRPE              | -2.6 | 0    |
| CSRNP3             | CSRNP3_tv1         | -2.6 | 0    |
| COQ5               | COQ5               | -2.6 | 0    |
| MAGOH              | MAGOH              | -2.6 | 0    |
| MAT2B              | MAT2B              | -2.6 | 0    |
| RPL18Ps*           | ENSSSCG00000031482 | -2.6 | 0    |
| ERGIC2             | ERGIC2             | -2.6 | 0    |
| SMPDL3A            | SMPDL3A            | -2.6 | 0.01 |
| YPEL5              | YPEL5              | -2.6 | 0    |
| SNRPB2             | ENSSSCG00000037602 | -2.6 | 0    |
| AIG1               | AIG1_tv1           | -2.6 | 0    |
| ISCA1Ps*           | ENSSSCG00000017077 | -2.6 | 0    |
| GTPBP10            | GTPBP10            | -2.6 | 0    |
| PYURF              | PYURF              | -2.6 | 0    |
| ATP5F1E            | ENSSSCG00000007524 | -2.6 | 0    |
| CMC2               | CMC2               | -2.6 | 0    |
| RPL27              | RPL27              | -2.6 | 0    |
| ACADM              | ACADM_tv1          | -2.6 | 0    |
| MGST1              | MGST1_tv4          | -2.6 | 0    |
| SUMO1              | SUMO1              | -2.6 | 0    |
| GLRX2              | GLRX2_tv2          | -2.6 | 0    |
| S100A2             | S100A2_tv          | -2.6 | 0    |
| MRPL33             | MRPL33             | -2.6 | 0    |
| GGNBP1             | ENSSSCG00000045946 | -2.6 | 0    |
| NDUFA12            | NDUFA12            | -2.6 | 0    |
| HYAL4              | HYAL4              | -2.6 | 0.03 |
| RBBP8              | RBBP8_tv1          | -2.6 | 0    |
| NDUFB2             | NDUFB2             | -2.6 | 0    |
| UBD                | UBD                | -2.6 | 0.02 |
| SRP9               | SRP9               | -2.6 | 0    |
| GSKIP              | GSKIP              | -2.7 | 0    |
| CHAC1              | CHAC1              | -2.7 | 0    |
| PSMD12             | PSMD12_tv1         | -2.7 | 0.01 |
| PPA1               | PPA1_tv1           | -2.7 | 0    |
| LOC100514211       | LOC100514211       | -2.7 | 0    |
| ELOF1              | ENSSSCG00000013613 | -2.7 | 0    |
| MSMB               | MSMB               | -2.7 | 0    |
| PTGER2             | PTGER2             | -2.7 | 0.01 |
| RPL9L*             | ENSSSCG00000012427 | -2.7 | 0    |
| RPL36A-HNRNPH2     | RPL36A-HNRNPH2     | -2.7 | 0    |
| PNRC2              | PNRC2              | -2.7 | 0    |
| HINT1              | HINT1              | -2.7 | 0    |
| KRT8               | KRT8_tv2           | -2.7 | 0    |
| ENSSSCG00000042457 | ENSSSCG00000042457 | -2.7 | 0    |
| ANAPC13            | ANAPC13            | -2.7 | 0    |
| CYTIP              | CYTIP_tv1          | -2.7 | 0.01 |
| POP5               | POP5               | -2.7 | 0    |

|              |                    |      |      |
|--------------|--------------------|------|------|
| TDH          | ENSSSCG00000021767 | -2.7 | 0    |
| ARPC5        | ARPC5              | -2.7 | 0    |
| LINS1        | LINS1              | -2.7 | 0    |
| UBXN1        | UBXN1_tvX2         | -2.7 | 0    |
| RPS20        | RPS20              | -2.7 | 0    |
| PPP1R3C      | PPP1R3C            | -2.7 | 0    |
| OXSM         | OXSM_tv1           | -2.7 | 0    |
| IFI44L       | IFI44L_tvX1        | -2.7 | 0    |
| LSM3         | LSM3               | -2.7 | 0    |
| BOLA1        | BOLA1              | -2.7 | 0    |
| RAD51C       | RAD51C_tv1         | -2.7 | 0    |
| GHITM        | GHITM_tv1          | -2.7 | 0    |
| SAR1A        | SAR1A              | -2.7 | 0    |
| LGALSL       | LGALSL             | -2.7 | 0    |
| GPD1L        | GPD1L              | -2.7 | 0    |
| MRPS36       | MRPS36             | -2.7 | 0    |
| ZNF91        | ZNF91_tvX3         | -2.7 | 0.02 |
| ZNF709L2*    | ZNF709L2*          | -2.7 | 0    |
| MICOS10      | ENSSSCG00000028414 | -2.7 | 0    |
| ANKRD37      | ANKRD37            | -2.7 | 0    |
| AIMP1        | AIMP1_tv3          | -2.7 | 0    |
| LOC102159626 | ENSSSCG00000042452 | -2.7 | 0    |
| RPL7         | RPL7               | -2.7 | 0    |
| CHCHD2       | CHCHD2             | -2.7 | 0    |
| RWDD4        | RWDD4              | -2.7 | 0    |
| MFSD8        | MFSD8              | -2.7 | 0    |
| ARMC1        | ARMC1              | -2.7 | 0    |
| ACTR2        | ACTR2_tv2          | -2.7 | 0    |
| EIF2S3Y      | EIF2S3Y            | -2.7 | 0    |
| METTL23      | METTL23            | -2.7 | 0    |
| SUCLG1       | SUCLG1             | -2.7 | 0    |
| NIPSNAP3A    | NIPSNAP3A          | -2.7 | 0    |
| SVBP         | SVBP_tvX1          | -2.7 | 0.01 |
| MGST2        | MGST2              | -2.7 | 0    |
| HIKESHI      | HIKESHI            | -2.7 | 0    |
| SORD         | SORD               | -2.7 | 0    |
| ABHD10       | ABHD10             | -2.7 | 0    |
| VCPKMT       | VCPKMT             | -2.7 | 0    |
| MKKS         | MKKS               | -2.7 | 0    |
| CCNG1        | CCNG1_tv           | -2.7 | 0    |
| COX7A2       | COX7A2             | -2.7 | 0    |
| MMADHC       | MMADHC             | -2.8 | 0    |
| TRAPPC13     | TRAPPC13           | -2.8 | 0    |
| FXN          | FXN_tv1            | -2.8 | 0.05 |
| PSMA6        | PSMA6_tv2          | -2.8 | 0    |
| HEPACAM2     | HEPACAM2           | -2.8 | 0    |
| PDCD10       | PDCD10             | -2.8 | 0    |

|                |                    |      |      |
|----------------|--------------------|------|------|
| FAM114A2       | FAM114A2           | -2.8 | 0    |
| SCOC           | SCOC               | -2.8 | 0    |
| SERPINB6       | SERPINB6_tv3       | -2.8 | 0    |
| TMEM126A       | TMEM126A           | -2.8 | 0    |
| SMIM19         | SMIM19             | -2.8 | 0    |
| H2AFVPs*       | ENSSSCG00000041469 | -2.8 | 0    |
| SUMO4          | SUMO4              | -2.8 | 0    |
| GRB14          | GRB14              | -2.8 | 0    |
| C1D            | ENSSSCG00000039331 | -2.8 | 0    |
| RPS7           | RPS7               | -2.8 | 0    |
| CMBL           | CMBL               | -2.8 | 0    |
| UGP2           | UGP2               | -2.8 | 0    |
| ISCA2          | ISCA2              | -2.8 | 0    |
| ATP5J2         | ATP5J2_tv1         | -2.8 | 0    |
| CSKMT          | CSKMT              | -2.8 | 0    |
| CYB561         | CYB561             | -2.8 | 0    |
| OSTCL*         | OSTCL*             | -2.8 | 0    |
| NIPSNAP2Ps*    | ENSSSCG00000038176 | -2.8 | 0.02 |
| RNF141         | RNF141_tv1         | -2.8 | 0    |
| CHCHD2L2*      | CHCHD2L2*          | -2.8 | 0    |
| CYP27B1        | CYP27B1            | -2.8 | 0    |
| SNAP23         | SNAP23_tv2         | -2.8 | 0.03 |
| NDUFB5         | NDUFB5             | -2.8 | 0    |
| CAPZA2         | CAPZA2             | -2.8 | 0    |
| MRPS28         | MRPS28             | -2.8 | 0    |
| LIAS           | LIAS               | -2.8 | 0    |
| COMMD6         | COMMD6_tv2         | -2.8 | 0    |
| LGALS1         | LGALS1             | -2.8 | 0    |
| BEX2           | ENSSSCG00000039273 | -2.8 | 0    |
| RBBP9          | RBBP9              | -2.8 | 0    |
| C14orf119      | C14orf119          | -2.8 | 0    |
| NDUFB9         | NDUFB9             | -2.8 | 0    |
| SLC35F5        | SLC35F5            | -2.8 | 0    |
| CKM            | CKM                | -2.8 | 0    |
| RSL24D1        | RSL24D1            | -2.8 | 0    |
| RPS18          | RPS18              | -2.8 | 0    |
| TMEM70         | TMEM70             | -2.8 | 0    |
| TMSB15B        | TMSB15B_tv2        | -2.8 | 0    |
| UXT            | UXT                | -2.8 | 0    |
| RPS18Ps2*      | ENSSSCG00000046110 | -2.8 | 0    |
| RPL17-C18orf32 | RPL17-C18orf32     | -2.8 | 0    |
| HADHB          | HADHB_tv1          | -2.8 | 0    |
| RPS29          | ENSSSCG00000038507 | -2.8 | 0    |
| TMEM258        | ENSSSCG00000027538 | -2.8 | 0    |
| SLC25A14       | SLC25A14_tvX3      | -2.8 | 0    |
| HSD17B7        | HSD17B7            | -2.8 | 0    |
| PEX3           | PEX3               | -2.8 | 0    |

|                    |                    |      |      |
|--------------------|--------------------|------|------|
| RPL35A             | RPL35A             | -2.8 | 0    |
| CCDC58             | CCDC58             | -2.8 | 0    |
| TMEM60             | TMEM60             | -2.8 | 0    |
| PTPN22             | PTPN22             | -2.8 | 0    |
| AP3S1              | AP3S1_tv           | -2.8 | 0    |
| TMEM167B           | TMEM167B           | -2.8 | 0    |
| RNF170             | RNF170_tv2         | -2.8 | 0    |
| NEGR1              | NEGR1              | -2.8 | 0    |
| ATP6               | ATP6               | -2.8 | 0.01 |
| NDUFA1Ps*          | ENSSSCG00000040694 | -2.8 | 0    |
| ATG4C              | ATG4C_tv1          | -2.8 | 0    |
| NAALAD2            | NAALAD2            | -2.8 | 0    |
| RPL14L*            | ENSSSCG00000029003 | -2.8 | 0    |
| C8orf37            | C8orf37            | -2.8 | 0    |
| GNPNAT1            | GNPNAT1            | -2.8 | 0    |
| LAMTOR2            | LAMTOR2_tv1        | -2.9 | 0    |
| SNAPC5             | SNAPC5             | -2.9 | 0    |
| LOC110257263       | ENSSSCG00000041925 | -2.9 | 0    |
| VMP1               | VMP1               | -2.9 | 0    |
| NDUFV2             | NDUFV2             | -2.9 | 0    |
| BRK1               | BRK1               | -2.9 | 0    |
| RBIS               | RBIS               | -2.9 | 0    |
| ENSSSCG00000047561 | ENSSSCG00000047561 | -2.9 | 0.03 |
| ABHD18             | ABHD18_tv4         | -2.9 | 0.02 |
| ACAD11             | ACAD11_tv1         | -2.9 | 0    |
| PZP                | PZP                | -2.9 | 0.02 |
| ENSSSCG00000043633 | ENSSSCG00000043633 | -2.9 | 0    |
| MSMO1              | MSMO1_tv1          | -2.9 | 0    |
| COX6A1             | COX6A1             | -2.9 | 0    |
| NDUFS4             | NDUFS4             | -2.9 | 0    |
| PRXL2A             | PRXL2A_tv4         | -2.9 | 0    |
| CYB5A              | CYB5A              | -2.9 | 0    |
| MRPL22             | MRPL22             | -2.9 | 0    |
| CFL2               | CFL2_tv2           | -2.9 | 0    |
| SMDT1              | SMDT1              | -2.9 | 0    |
| RPS11              | RPS11              | -2.9 | 0    |
| PHYH               | PHYH_tv1           | -2.9 | 0    |
| SMIM26             | SMIM26             | -2.9 | 0    |
| SCP2               | SCP2_tv1           | -2.9 | 0    |
| MCEE               | MCEE               | -2.9 | 0    |
| FASTKD2            | FASTKD2_tv3        | -2.9 | 0    |
| RPL10A             | ENSSSCG00000011206 | -2.9 | 0    |
| NME1               | NME1               | -2.9 | 0    |
| COX5B              | COX5B              | -2.9 | 0    |
| ENSSSCG00000045049 | ENSSSCG00000045049 | -2.9 | 0.03 |
| NCK1               | NCK1_tv            | -2.9 | 0    |
| PRSS35             | PRSS35             | -2.9 | 0    |

|                    |                    |      |      |
|--------------------|--------------------|------|------|
| PPA2               | PPA2               | -2.9 | 0    |
| CCDC68             | CCDC68             | -2.9 | 0.02 |
| UCHL3              | UCHL3              | -2.9 | 0    |
| ENSSSCG00000049194 | ENSSSCG00000049194 | -2.9 | 0.03 |
| COPS2              | COPS2              | -2.9 | 0    |
| RPS27L             | RPS27L             | -2.9 | 0    |
| CCNB1IP1           | CCNB1IP1           | -2.9 | 0    |
| GTPBP8             | GTPBP8_tv1         | -2.9 | 0    |
| KRR1               | KRR1               | -2.9 | 0    |
| ENSSSCG00000043294 | ENSSSCG00000043294 | -2.9 | 0.05 |
| DGKB               | DGKB               | -2.9 | 0    |
| ATP5C1             | ATP5C1_tv1         | -3   | 0    |
| TNFAIP6            | TNFAIP6            | -3   | 0    |
| ICAM3              | ICAM3_tv1          | -3   | 0.02 |
| ACSM4              | ACSM4_tv1          | -3   | 0.03 |
| NDUFC2             | NDUFC2             | -3   | 0    |
| CIB4               | CIB4               | -3   | 0    |
| ARPP19Ps*          | ENSSSCG00000037176 | -3   | 0    |
| MED21              | MED21              | -3   | 0    |
| SMIM8              | SMIM8              | -3   | 0    |
| SAMD13             | SAMD13             | -3   | 0    |
| PRKACB             | PRKACB_tv1         | -3   | 0    |
| MTERF1             | MTERF1             | -3   | 0    |
| PIH1D2             | PIH1D2             | -3   | 0    |
| CYB5R4             | CYB5R4             | -3   | 0    |
| MYOM2              | MYOM2              | -3   | 0    |
| SNX31              | SNX31              | -3   | 0    |
| DYNLL1-AS1*        | ENSSSCG00000031756 | -3   | 0.01 |
| UQCRC2             | UQCRC2             | -3   | 0    |
| SPP1               | SPP1_tv1           | -3   | 0    |
| PI16               | PI16_tv1           | -3   | 0    |
| FOLH1              | FOLH1_tv1          | -3   | 0    |
| PRDX1              | PRDX1_tv3          | -3   | 0    |
| COX1               | COX1               | -3   | 0    |
| UQCRQ              | UQCRQ              | -3   | 0    |
| NDUFA2             | NDUFA2             | -3   | 0    |
| SKP1               | SKP1               | -3   | 0    |
| FGL1               | FGL1               | -3   | 0    |
| ENSSSCG00000045252 | ENSSSCG00000045252 | -3   | 0.01 |
| APOO               | APOO_tv1           | -3   | 0    |
| MRPS23             | MRPS23             | -3   | 0    |
| LOC100621455       | ENSSSCG00000041401 | -3   | 0    |
| LOC106510640       | ENSSSCG00000047080 | -3.1 | 0.04 |
| ALPI               | ALPI               | -3.1 | 0    |
| THYN1              | THYN1_tv1          | -3.1 | 0    |
| CENPN              | CENPN_tv2          | -3.1 | 0    |
| SELENOT            | SELENOT            | -3.1 | 0    |



|                    |                    |      |      |
|--------------------|--------------------|------|------|
| COX7A2L            | COX7A2L            | -3.1 | 0    |
| COQ10B             | COQ10B             | -3.1 | 0    |
| CIDEA              | CIDEA_tv1          | -3.1 | 0    |
| MROH5L*            | ENSSSCG00000033737 | -3.1 | 0    |
| C11orf71           | C11orf71           | -3.1 | 0    |
| TOMM5              | TOMM5              | -3.1 | 0    |
| NDUFA11            | NDUFA11            | -3.1 | 0.01 |
| AZIN1              | AZIN1              | -3.1 | 0    |
| GMFB               | GMFB_tv            | -3.1 | 0    |
| DECR1              | DECR1              | -3.1 | 0    |
| CAPS2              | CAPS2              | -3.1 | 0.03 |
| RPL22L1            | ENSSSCG00000036114 | -3.1 | 0    |
| CDH3               | CDH3               | -3.1 | 0    |
| RGN                | RGN_tv2            | -3.1 | 0    |
| PSMA5              | PSMA5_tv1          | -3.1 | 0    |
| C7H6orf125         | C7H6orf125         | -3.1 | 0    |
| ARG1               | ARG1_tv2           | -3.1 | 0    |
| ENSSSCG00000035654 | ENSSSCG00000035654 | -3.1 | 0    |
| GSTA2              | GSTA2              | -3.1 | 0    |
| PON2               | PON2_tv1           | -3.1 | 0    |
| HPD_tv1            | HPD_tv1            | -3.1 | 0    |
| BCKDHB             | BCKDHB             | -3.1 | 0    |
| LOC106505711       | ENSSSCG00000050456 | -3.1 | 0    |
| ETFA               | ETFA               | -3.1 | 0    |
| ATP6AP2            | ATP6AP2            | -3.1 | 0    |
| GNAT3              | GNAT3              | -3.1 | 0.03 |
| SMIM14             | SMIM14             | -3.1 | 0    |
| CDK7               | CDK7               | -3.2 | 0    |
| RPS16              | RPS16              | -3.2 | 0    |
| CLCA2              | CLCA2              | -3.2 | 0.04 |
| TIAL1              | TIAL1_tv2          | -3.2 | 0    |
| PMPCB              | PMPCB              | -3.2 | 0    |
| LOC100521937       | ENSSSCG00000046349 | -3.2 | 0.01 |
| ARRDC3             | ARRDC3_tv1         | -3.2 | 0    |
| TIFAB              | TIFAB              | -3.2 | 0.05 |
| TRAPPC5            | TRAPPC5            | -3.2 | 0    |
| DMBT1              | DMBT1_tv           | -3.2 | 0.01 |
| LncRNA             | LncRNA             | -3.2 | 0    |
| WDR89              | WDR89              | -3.2 | 0    |
| ATP5IF1            | ATP5IF1            | -3.2 | 0    |
| RPS15A             | RPS15A             | -3.2 | 0    |
| EMC3               | EMC3               | -3.2 | 0    |
| RAB27B             | RAB27B             | -3.2 | 0    |
| EFCAB10            | EFCAB10_tv2        | -3.2 | 0    |
| SHAS2              | SHAS2              | -3.2 | 0.03 |
| PDZK1IP1L          | PDZK1IP1L          | -3.2 | 0.03 |
| DPPA2              | DPPA2              | -3.2 | 0.05 |

|                    |                    |      |      |
|--------------------|--------------------|------|------|
| ISOC1              | ISOC1              | -3.2 | 0    |
| PHKB               | PHKB_tv2           | -3.2 | 0.04 |
| TSPAN12            | TSPAN12_tvX1       | -3.2 | 0    |
| POMP               | POMP               | -3.2 | 0    |
| NDUFB1             | NDUFB1             | -3.2 | 0    |
| TMEM14C            | TMEM14C            | -3.2 | 0    |
| RGS18              | RGS18              | -3.2 | 0    |
| LY96               | LY96               | -3.2 | 0    |
| MRPS10             | MRPS10             | -3.2 | 0    |
| PIH1D3             | PIH1D3             | -3.3 | 0.01 |
| RPS21              | RPS21              | -3.3 | 0    |
| CTRB2L             | CTRB2L             | -3.3 | 0.02 |
| NDUFS5             | NDUFS5             | -3.3 | 0    |
| UBB                | UBB                | -3.3 | 0    |
| NAT1               | NAT1               | -3.3 | 0    |
| MRPL39             | MRPL39             | -3.3 | 0    |
| CASP1              | CASP1              | -3.3 | 0    |
| Pseudogene         | Pseudogene         | -3.3 | 0    |
| ASB5               | ASB5               | -3.3 | 0    |
| ENSSSCG00000042551 | ENSSSCG00000042551 | -3.3 | 0.01 |
| TSG101             | ENSSSCG00000041063 | -3.3 | 0    |
| KCNC2              | KCNC2              | -3.3 | 0    |
| DNAJC19            | DNAJC19            | -3.3 | 0    |
| AK6                | AK6                | -3.3 | 0    |
| HAX1               | HAX1_tv1           | -3.3 | 0.02 |
| ENSSSCG00000051063 | ENSSSCG00000051063 | -3.4 | 0.04 |
| ATP5PO             | ATP5PO             | -3.4 | 0    |
| RPS27              | ENSSSCG00000031838 | -3.4 | 0    |
| SPA17              | SPA17              | -3.4 | 0    |
| ATP5PD             | ATP5PD             | -3.4 | 0    |
| TPD52L1            | TPD52L1            | -3.4 | 0.02 |
| RSAD2              | RSAD2              | -3.4 | 0.02 |
| TEFM               | TEFM               | -3.4 | 0    |
| FANCF              | FANCF              | -3.4 | 0    |
| PKIA               | PKIA               | -3.4 | 0    |
| ECHS1              | ECHS1              | -3.4 | 0    |
| CUL2               | CUL2               | -3.4 | 0    |
| LYRM2              | ENSSSCG00000004324 | -3.4 | 0    |
| ATP5MG             | ATP5MG             | -3.4 | 0    |
| LOC110256489       | ENSSSCG00000042665 | -3.4 | 0    |
| RPL39              | ENSSSCG00000030849 | -3.4 | 0    |
| STMN2              | STMN2              | -3.4 | 0    |
| RPS23L*            | ENSSSCG00000012200 | -3.4 | 0    |
| MOB4               | MOB4_tv1           | -3.4 | 0    |
| ABRACL             | ABRACL             | -3.4 | 0    |
| ND3                | ND3                | -3.4 | 0    |
| ENSSSCG00000043724 | ENSSSCG00000043724 | -3.4 | 0.01 |

|                    |                    |      |      |
|--------------------|--------------------|------|------|
| COL6A6             | COL6A6             | -3.5 | 0.04 |
| CBR4               | CBR4_tv1           | -3.5 | 0    |
| SLIRP              | SLIRP              | -3.5 | 0    |
| LACTB2             | LACTB2             | -3.5 | 0    |
| FCGR3A             | FCGR3A_tv3         | -3.5 | 0    |
| ROMO1              | ROMO1              | -3.5 | 0    |
| SLX4IP             | SLX4IP             | -3.5 | 0    |
| TMPRSS15           | TMPRSS15           | -3.5 | 0.01 |
| COCH               | COCH               | -3.5 | 0    |
| CROT               | CROT_tv2           | -3.5 | 0    |
| PJVK               | PJVK               | -3.5 | 0    |
| SRGN               | SRGN_tv1           | -3.5 | 0    |
| IER3IP1            | IER3IP1            | -3.5 | 0    |
| LOC110257240       | LOC110257240_tv1   | -3.5 | 0.01 |
| GTF2H5             | GTF2H5             | -3.5 | 0    |
| CIDEB              | CIDEB_tv1          | -3.5 | 0.02 |
| TIMM8A             | TIMM8A             | -3.5 | 0    |
| ALK                | ALK                | -3.5 | 0    |
| EZR                | EZR_tv1            | -3.5 | 0.01 |
| UQCR10             | UQCR10             | -3.5 | 0    |
| ABI1               | ABI1_tv14          | -3.5 | 0.01 |
| ENSSSCG00000041274 | ENSSSCG00000041274 | -3.5 | 0    |
| PSMA2              | PSMA2              | -3.5 | 0    |
| TMSB15A            | ENSSSCG00000028695 | -3.5 | 0    |
| MORN2              | MORN2              | -3.6 | 0    |
| HSPE1              | HSPE1_tv1          | -3.6 | 0    |
| MRPL13             | MRPL13             | -3.6 | 0    |
| PET100             | PET100             | -3.6 | 0    |
| GLRX               | GLRX_tv1           | -3.6 | 0    |
| MED31              | MED31              | -3.6 | 0.05 |
| PLAC8              | PLAC8_tv2          | -3.6 | 0    |
| LOC110257355       | LOC110257355       | -3.6 | 0.04 |
| NDUFA1             | NDUFA1             | -3.6 | 0    |
| DEFB123            | DEFB123_tv1        | -3.6 | 0    |
| LOC110262153       | ENSSSCG00000047803 | -3.6 | 0    |
| RXFP2              | RXFP2              | -3.6 | 0.01 |
| CTSL               | CTSL_tv1           | -3.6 | 0    |
| SF3B6              | SF3B6              | -3.6 | 0    |
| LOC102160652       | ENSSSCG00000046559 | -3.6 | 0.04 |
| MRPL50             | MRPL50             | -3.6 | 0    |
| ENSSSCG00000034829 | ENSSSCG00000034829 | -3.6 | 0    |
| RPS23Ps3*          | ENSSSCG00000039020 | -3.6 | 0    |
| LOC106507633       | ENSSSCG00000043385 | -3.6 | 0.05 |
| LOC102167757       | ENSSSCG00000044335 | -3.7 | 0.03 |
| LRRC39             | LRRC39             | -3.7 | 0    |
| TUBA1D             | TUBA1D             | -3.7 | 0.03 |
| NIPAL1             | NIPAL1             | -3.7 | 0    |

|                                    |                     |      |      |
|------------------------------------|---------------------|------|------|
| CST3                               | CST3                | -3.7 | 0    |
| RPL11L                             | RPL11L              | -3.7 | 0    |
| TSTD1                              | TSTD1               | -3.7 | 0    |
| KLK1                               | KLK1                | -3.7 | 0    |
| MTRNR2L8                           | MTRNR2L8            | -3.7 | 0    |
| SERPINA3-1                         | SERPINA3-1          | -3.7 | 0    |
| FAAP24                             | FAAP24_tv1          | -3.7 | 0.05 |
| SCGB2A2                            | SCGB2A2             | -3.7 | 0.03 |
| RPH3A                              | RPH3A               | -3.7 | 0    |
| COX2                               | COX2                | -3.7 | 0    |
| FMC1                               | FMC1                | -3.8 | 0    |
| CD36L1                             | CD36L1              | -3.8 | 0    |
| ADAM3A                             | ADAM3A              | -3.8 | 0.01 |
| IL18                               | IL18_tv1            | -3.8 | 0    |
| RPL27Ps*                           | ENSSSCG00000007500  | -3.8 | 0    |
| SPACA1                             | SPACA1              | -3.8 | 0.02 |
| COX7B                              | COX7B               | -3.8 | 0    |
| SPTY2D10S                          | ENSSSCG000000038037 | -3.8 | 0.05 |
| NDUFB11                            | NDUFB11             | -3.8 | 0    |
| CREG1                              | CREG1               | -3.8 | 0.01 |
| MT-ND4L                            | MT-ND4L             | -3.9 | 0    |
| SFRP2                              | SFRP2               | -3.9 | 0.04 |
| ATP5MC3                            | ATP5MC3             | -3.9 | 0    |
| AKR1C1                             | AKR1C1              | -3.9 | 0    |
| CCDC28A                            | CCDC28A             | -3.9 | 0    |
| GC                                 | GC                  | -3.9 | 0    |
| RPL22L1Ps*                         | ENSSSCG000000015460 | -3.9 | 0    |
| MT-CO2                             | MT-CO2              | -3.9 | 0    |
| PPM1K                              | PPM1K               | -3.9 | 0    |
| RPA3                               | RPA3                | -4   | 0    |
| TSACC                              | TSACC               | -4   | 0.01 |
| SLC25A16                           | SLC25A16            | -4   | 0    |
| ATP5PDL*                           | ENSSSCG000000016881 | -4   | 0    |
| GCA                                | GCA                 | -4   | 0    |
| ENSSSCG000000049234                | ENSSSCG000000049234 | -4.1 | 0    |
| CYP3A46                            | CYP3A46             | -4.1 | 0    |
| ENSSSCG000000042146                | ENSSSCG000000042146 | -4.1 | 0    |
| RDH16                              | RDH16               | -4.1 | 0    |
| DEFB122                            | DEFB122             | -4.1 | 0    |
| HERPUD1                            | HERPUD1_tv1         | -4.2 | 0.04 |
| IFIT1L1*                           | IFIT1L1*            | -4.2 | 0    |
| CEACAM6L                           | CEACAM6L_tv1        | -4.2 | 0.02 |
| VSIG1                              | VSIG1_tv2           | -4.2 | 0    |
| Endonuclease/reverse transcriptase | ENSSSCG000000047266 | -4.2 | 0.03 |
| PRDX3                              | PRDX3               | -4.2 | 0    |
| SSMEM1                             | SSMEM1              | -4.2 | 0    |
| CISD1                              | ENSSSCG000000035762 | -4.2 | 0    |

|                    |                    |      |      |
|--------------------|--------------------|------|------|
| APOH               | APOH               | -4.2 | 0    |
| DYNLT2B            | DYNLT2B_tv2        | -4.2 | 0    |
| LCMT1              | LCMT1_tv1          | -4.2 | 0    |
| RPS24Ps*           | ENSSSCG00000016840 | -4.3 | 0    |
| RPS16Ps*           | ENSSSCG00000005432 | -4.3 | 0    |
| SNX14              | SNX14_tv1          | -4.3 | 0.01 |
| ENSSSCG00000047459 | ENSSSCG00000047459 | -4.3 | 0.02 |
| IL13RA2            | IL13RA2            | -4.3 | 0    |
| NT5C3              | NT5C3              | -4.3 | 0.01 |
| TGM5               | TGM5               | -4.3 | 0    |
| lncRNA             | lncRNA             | -4.3 | 0    |
| ADH1C              | ADH1C              | -4.3 | 0.01 |
| KLRK1              | KLRK1_tv           | -4.4 | 0    |
| C5orf58            | C5orf58            | -4.4 | 0    |
| TIGD4              | TIGD4              | -4.4 | 0    |
| LOC110259852       | ENSSSCG00000036448 | -4.4 | 0.02 |
| GPD1L2*            | ENSSSCG00000004243 | -4.4 | 0    |
| ADAM5              | ADAM5              | -4.5 | 0    |
| TMEM27             | TMEM27             | -4.5 | 0    |
| MT-TP              | ENSSSCG00000018096 | -4.5 | 0    |
| SLA-DRB4           | SLA-DRB4           | -4.5 | 0.04 |
| ARPC3              | ARPC3              | -4.6 | 0    |
| ASPA               | ASPA_tv1           | -4.6 | 0.01 |
| RPL23AL*           | RPL23AL*           | -4.6 | 0    |
| ARL15              | ENSSSCG00000048060 | -4.6 | 0    |
| MIR22              | MIR22              | -4.6 | 0    |
| CHRNA6             | CHRNA6_tv1         | -4.6 | 0    |
| S100A12            | S100A12            | -4.6 | 0    |
| ADAM5              | ADAM5              | -4.7 | 0    |
| LYZ                | LYZ-1              | -4.7 | 0    |
| DEFB119            | DEFB119            | -4.7 | 0.03 |
| FBP2               | FBP2               | -4.7 | 0    |
| CYP3A29            | CYP3A29            | -4.8 | 0    |
| PNLIPRP2           | PNLIPRP2           | -4.8 | 0    |
| lncRNA             | lncRNA             | -4.9 | 0    |
| STAP2              | STAP2_tv2          | -4.9 | 0    |
| CDX4               | CDX4               | -4.9 | 0    |
| ANKRD66            | ANKRD66            | -4.9 | 0.01 |
| MAGEB18            | MAGEB18            | -5   | 0    |
| DTX1-AS*           | ENSSSCG00000047984 | -5   | 0.01 |
| TRAV8-3            | ENSSSCG00000034110 | -5   | 0    |
| SNORA63            | SNORA63            | -5.1 | 0    |
| CEACAM1L*          | ENSSSCG00000038419 | -5.2 | 0    |
| MRAP2              | MRAP2_tvX1         | -5.2 | 0.01 |
| ZNF226             | ZNF226_tv7         | -5.2 | 0.04 |
| CDH19              | CDH19_tv1          | -5.2 | 0.04 |
| LOC110261477       | LOC110261477       | -5.2 | 0    |

|                    |                    |      |      |
|--------------------|--------------------|------|------|
| PON1               | PON1               | -5.2 | 0.04 |
| FABP1              | FABP1              | -5.2 | 0.04 |
| TMPRSS11C          | ENSSSCG00000029658 | -5.3 | 0.02 |
| IFI6               | IFI6               | -5.3 | 0    |
| HCST               | ENSSSCG00000002918 | -5.3 | 0.05 |
| NDST4              | NDST4_tv1          | -5.4 | 0    |
| IGJ                | IGJ_tv1            | -5.4 | 0    |
| IFI27              | ISG12(A)           | -5.6 | 0    |
| GDAP1L1            | GDAP1L1            | -5.6 | 0    |
| PANK1              | PANK1_tvb          | -5.6 | 0    |
| API5               | API5_tv2           | -5.6 | 0    |
| MIR1244-1          | MIR1244-1          | -5.7 | 0    |
| LHFPL5             | LHFPL5             | -5.7 | 0.01 |
| CYP11B2            | CYP11B2            | -5.7 | 0    |
| IFRD1              | IFRD1_tv1          | -5.7 | 0.02 |
| HSD17B2            | HSD17B2            | -5.7 | 0    |
| RPS27APs*          | ENSSSCG00000035890 | -5.8 | 0    |
| ENSSSCG00000037148 | ENSSSCG00000037148 | -5.8 | 0    |
| LncRNA             | LncRNA             | -5.8 | 0.03 |
| GZMH               | GZMH               | -5.9 | 0    |
| lncRNA             | lncRNA             | -5.9 | 0    |
| ETFRF1             | ETFRF1             | -6   | 0    |
| CD59               | CD59               | -6   | 0    |
| ANKRD22            | ANKRD22            | -6.1 | 0    |
| CA5B               | CA5B               | -6.2 | 0    |
| LOC102165115       | ENSSSCG00000041917 | -6.3 | 0    |
| TFRC               | TFRC_tv1           | -6.3 | 0    |
| lncRNA             | lncRNA             | -6.4 | 0    |
| UNK37*             | UNK37*             | -6.5 | 0    |
| LOC102159522       | ENSSSCG00000041230 | -6.7 | 0    |
| ENSSSCG00000049111 | ENSSSCG00000049111 | -6.7 | 0.03 |
| UGT2A1             | UGT2A1_tv1         | -6.7 | 0    |
| SAA3               | SAA3_tv1           | -6.8 | 0    |
| Y_RNA_4            | Y_RNA_4            | -6.8 | 0    |
| LOC102165231       | LOC102165231       | -7   | 0.01 |
| SNORA8             | SNORA8             | -7.1 | 0.01 |
| ALG13              | ENSSSCG00000012586 | -7.2 | 0    |
| CLEC7A             | CLEC7A             | -7.3 | 0.01 |
| CXCL8              | CXCL8_tv1          | -7.4 | 0.02 |
| CLEC12B            | CLEC12B_tv1        | -7.4 | 0.02 |
| ENSSSCG00000047986 | ENSSSCG00000047986 | -7.5 | 0.02 |
| NUGGC              | NUGGC              | -7.8 | 0    |
| CLPS               | CLPS_tv1           | -7.8 | 0    |
| CXCL13             | CXCL13             | -8   | 0    |
| ATP5MJL            | ENSSSCG00000016791 | -8   | 0    |
| MDFIC2             | MDFIC2             | -8.2 | 0.01 |
| NCBP2L             | NCBP2L             | -8.3 | 0.01 |

|                                    |                                    |       |      |
|------------------------------------|------------------------------------|-------|------|
| LBP                                | LBP                                | -8.5  | 0    |
| lncRNA                             | lncRNA                             | -8.8  | 0    |
| SDSL                               | SDSL_tv1                           | -9.7  | 0    |
| DPPA3                              | DPPA3                              | -10   | 0    |
| ENSSSCG00000041918                 | ENSSSCG00000041918                 | -10.3 | 0.02 |
| TMEM210                            | TMEM210                            | -10.6 | 0    |
| FAM167B                            | FAM167B                            | -11.5 | 0.02 |
| PR39                               | PR39                               | -11.9 | 0.01 |
| LECT2                              | LECT2                              | -12.8 | 0.01 |
| Endonuclease/reverse transcriptase | Endonuclease/reverse transcriptase | -15   | 0    |
| RBM18                              | RBM18_tv1                          | -15.1 | 0    |
| Endonuclease/reverse transcriptase | ENSSSCG00000040992                 | -18.3 | 0    |
| GZMA                               | GZMA                               | -18.8 | 0    |
| UNK95*                             | UNK95*                             | -22.9 | 0    |
| LOC102162756                       | ENSSSCG00000047396                 | -36.3 | 0    |
| TEDDM1L2*                          | TEDDM1L2*                          | -37.9 | 0    |
| PHYHIPL                            | PHYHIPL                            | -39.4 | 0    |
| TRIM15                             | TRIM15                             | -49.6 | 0    |
