# Supplementary material for: Soy Formula Is Not Estrogenic and Does Not Result in Reproductive Toxicity in Male Piglets: Results from a Controlled Feeding Study
Source: MDPI journal article supplement (doi:10.3390/nu14051126), 2022-03-07
Supplement: s1 [file s1]

| Reannotated Gene   | Gene               | Fold Change | FDR  |
|--------------------|--------------------|-------------|------|
| SFTA2              | SFTA2              | 76.4        | 0.05 |
| ATP6               | ATP6               | 52.8        | 0.04 |
| PDE4A              | PDE4A_tv2          | 41.3        | 0.02 |
| SLCO4A1            | SLCO4A1            | 38.9        | 0.03 |
| ENSSSCG00000049906 | ENSSSCG00000049906 | 36.1        | 0.04 |
| DEFB115            | DEFB115            | 27.1        | 0.01 |
| TSPAN1             | TSPAN1_tv1         | 23.9        | 0.03 |
| HOXB9              | HOXB9              | 16.6        | 0.01 |
| UNK129*            | UNK129             | 15.1        | 0    |
| PTPRO              | PTPRO              | 14.9        | 0.04 |
| LEFTY2             | LEFTY2_tv1         | 13.5        | 0.04 |
| TRPM5              | TRPM5              | 12.9        | 0.04 |
| CIZ1               | CIZ1_tvX11         | 11          | 0.01 |
| RRP8               | RRP8               | 10.9        | 0.03 |
| CYP1A1             | CYP1A1             | 10.7        | 0.03 |
| HOXB6              | HOXB6              | 10.7        | 0.02 |
| ENSSSCG00000045545 | ENSSSCG00000045545 | 10.4        | 0.02 |
| HYOU1              | HYOU1_tv2          | 10.3        | 0.03 |
| NOTCH3             | NOTCH3_tv1         | 10.1        | 0.01 |
| EPCAM              | EPCAM              | 9.3         | 0.02 |
| SULT1A1            | SULT1A1_tv         | 9.2         | 0.02 |
| MEIS2              | MEIS2_tva          | 8.7         | 0    |
| PRR7               | PRR7               | 8.6         | 0.04 |
| KRT19              | KRT19              | 8.3         | 0    |
| CX3CL1             | CX3CL1_tv1         | 8.2         | 0.04 |
| MATN4              | MATN4              | 7.8         | 0.02 |
| LOC110262312       | ENSSSCG00000044344 | 6.8         | 0.02 |
| TACSTD2            | TACSTD2            | 6.8         | 0.03 |
| PRSS8              | PRSS8              | 6.7         | 0.02 |
| GATA1              | GATA1              | 6.5         | 0.03 |
| ARHGEF5            | ARHGEF5            | 6.2         | 0.05 |
| AHSP               | AHSP_tv1           | 6.2         | 0    |
| PTGIR              | PTGIR              | 6.2         | 0    |
| R3HDM2             | R3HDM2             | 6.2         | 0    |
| NR2F1              | NR2F1_tv1          | 6           | 0    |
| NDUFA4L2           | NDUFA4L2           | 6           | 0.03 |
| RERE               | RERE_tv2           | 5.8         | 0.03 |
| KCNMB1             | KCNMB1_tv1         | 5           | 0.05 |
| COL26A1            | COL26A1            | 5           | 0.03 |
| NRIP2              | NRIP2              | 5           | 0.01 |
| SLPI               | SLPI               | 4.9         | 0.02 |
| CPZ                | CPZ                | 4.9         | 0.04 |
| NGF                | NGF                | 4.6         | 0.03 |
| LOC100514340       | ENSSSCG00000032383 | 4.6         | 0    |
| NUMA1              | NUMA1_tvX1         | 4.5         | 0    |
| ENSSSCG00000042133 | ENSSSCG00000042133 | 4.4         | 0.02 |

|                           |                    |     |      |
|---------------------------|--------------------|-----|------|
| PTGER1                    | PTGER1             | 4.4 | 0.04 |
| NPTX1                     | NPTX1              | 4.4 | 0.01 |
| FCGBP                     | FCGBP              | 4.4 | 0.04 |
| CACNA1B                   | CACNA1B_tv1        | 4.4 | 0.03 |
| ZAP70                     | ZAP70              | 4.4 | 0.05 |
| MUC6                      | MUC6               | 4.3 | 0.03 |
| NKD1                      | NKD1               | 4.3 | 0    |
| ALOX12                    | ALOX12             | 4.3 | 0    |
| UGT1A1                    | ENSSSCG00000036274 | 4.3 | 0    |
| LncRNA                    | LncRNA             | 4.1 | 0    |
| RGS12                     | RGS12_tv2          | 4.1 | 0    |
| LMOD1                     | LMOD1              | 4.1 | 0.01 |
| SYT15                     | ENSSSCG00000028341 | 4.1 | 0.01 |
| LOC106509797/LOC110259996 | ENSSSCG00000044592 | 4.1 | 0.02 |
| ZNF883                    | ENSSSCG00000047560 | 4   | 0.03 |
| LINGO1                    | LINGO1             | 4   | 0    |
| CAPN6                     | CAPN6              | 3.8 | 0.03 |
| OXTR                      | OXTR_tv1           | 3.8 | 0.02 |
| FZD9                      | FZD9               | 3.8 | 0.02 |
| ENSSSCG00000044418        | ENSSSCG00000044418 | 3.8 | 0.04 |
| HAL                       | HAL                | 3.8 | 0    |
| HOXB4                     | HOXB4              | 3.8 | 0.03 |
| LAD1                      | LAD1               | 3.8 | 0.03 |
| ADAMTS16                  | ADAMTS16_tv1       | 3.8 | 0.01 |
| TM9SF1                    | TM9SF1_tv2         | 3.7 | 0.03 |
| ENSSSCG00000018657        | ENSSSCG00000018657 | 3.7 | 0.02 |
| PCDH1                     | PCDH1_tv2          | 3.7 | 0    |
| PYGM                      | PYGM_tv1           | 3.6 | 0.01 |
| BRSK2                     | BRSK2              | 3.6 | 0.04 |
| LOC110260790              | ENSSSCG00000049984 | 3.6 | 0.04 |
| CXCL12                    | CXCL12_tv3         | 3.6 | 0.01 |
| SIAH3                     | SIAH3              | 3.5 | 0.01 |
| LAMA5                     | ENSSSCG00000032761 | 3.4 | 0    |
| SEH1L                     | SEH1L_tv1          | 3.3 | 0.04 |
| CD248                     | CD248              | 3.3 | 0    |
| ADRA1D                    | ADRA1D             | 3.3 | 0.04 |
| RRBP1                     | RRBP1              | 3.3 | 0    |
| TBX1                      | TBX1               | 3.3 | 0    |
| ID4                       | ID4                | 3.3 | 0.03 |
| JPH4                      | JPH4_tv1           | 3.3 | 0.04 |
| CD300CL*                  | CD300CL*           | 3.3 | 0.04 |
| NES                       | NES                | 3.2 | 0    |
| HPDL                      | HPDL               | 3.2 | 0    |
| NOVA2                     | NOVA2              | 3.2 | 0.01 |
| HAS1                      | HAS1               | 3.2 | 0.01 |
| APLNR                     | APLNR              | 3.2 | 0    |
| RTN4RL2                   | RTN4RL2            | 3.2 | 0.01 |

|          |                    |     |      |
|----------|--------------------|-----|------|
| MYH14    | MYH14_tv1          | 3.1 | 0    |
| NCR3     | NCR3               | 3.1 | 0    |
| HOXA5    | HOXA5              | 3.1 | 0.04 |
| COL18A1  | COL18A1_tv2        | 3.1 | 0    |
| LYNX1    | LYNX1              | 3.1 | 0.01 |
| SPTBN4   | ENSSSCG00000037494 | 3.1 | 0.04 |
| MYH9     | MYH9               | 3.1 | 0    |
| SDC3     | SDC3               | 3.1 | 0.02 |
| MYH10    | ENSSSCG00000038144 | 3.1 | 0    |
| HMG5     | HMG5               | 3.1 | 0    |
| SSUH2    | SSUH2              | 3   | 0.05 |
| SHANK1   | SHANK1_tv1         | 3   | 0.01 |
| PLVAP    | PLVAP              | 3   | 0    |
| STAC2    | STAC2              | 3   | 0.04 |
| CD2APL1  | CD2APL1            | 3   | 0.05 |
| APLN     | APLN               | 3   | 0    |
| TMEM37   | TMEM37             | 3   | 0    |
| ANKRD35  | ANKRD35            | 3   | 0.03 |
| TAF5     | TAF5               | 3   | 0.01 |
| MOXD1    | MOXD1              | 3   | 0.02 |
| GPR4     | GPR4               | 3   | 0    |
| WFDC2    | WFDC2              | 3   | 0.04 |
| COL13A1  | COL13A1_tv1        | 2.9 | 0    |
| ADAMTSL2 | ADAMTSL2           | 2.9 | 0.01 |
| MEGF6    | MEGF6              | 2.9 | 0    |
| CACNA1C  | ENSSSCG00000027725 | 2.9 | 0.02 |
| MXRA5    | ENSSSCG00000012832 | 2.9 | 0    |
| ITGA3    | ITGA3_tva          | 2.9 | 0.01 |
| CLEC14A  | CLEC14A            | 2.9 | 0.02 |
| ACTB     | ACTB               | 2.9 | 0    |
| GUSB     | GUSB               | 2.9 | 0    |
| BDKRB2   | BDKRB2_tvX2        | 2.9 | 0.02 |
| SPTA1    | SPTA1              | 2.9 | 0.02 |
| PLAT     | PLAT_tv1           | 2.9 | 0.02 |
| RNF183   | RNF183             | 2.9 | 0.05 |
| CD93     | CD93               | 2.9 | 0    |
| ADGRL1   | ADGRL1_tv1         | 2.8 | 0    |
| CYP2S1   | CYP2S1             | 2.8 | 0    |
| TMEM151A | TMEM151A           | 2.8 | 0.01 |
| SAMD11   | SAMD11             | 2.8 | 0    |
| PTMS     | PTMS               | 2.8 | 0    |
| NEURL1B  | NEURL1B            | 2.8 | 0    |
| LLGL2    | LLGL2              | 2.8 | 0.01 |
| SF1      | SF1_tv6            | 2.8 | 0.05 |
| SPSB1    | SPSB1              | 2.8 | 0.01 |
| CERCAM   | CERCAM             | 2.8 | 0.01 |
| EPPK1    | EPPK1              | 2.8 | 0.01 |

|                    |                    |     |      |
|--------------------|--------------------|-----|------|
| CNN2               | CNN2               | 2.8 | 0.04 |
| GLI2               | GLI2               | 2.8 | 0    |
| KCNK6              | KCNK6              | 2.8 | 0.01 |
| LRRC8D             | LRRC8D             | 2.8 | 0.03 |
| NIM1K              | NIM1K              | 2.7 | 0    |
| HOXC8              | HOXC8              | 2.7 | 0.02 |
| PLEC               | PLEC               | 2.7 | 0    |
| IGF2-AS            | IGF2-AS            | 2.7 | 0.04 |
| MEIS3              | MEIS3              | 2.7 | 0.03 |
| ADGRL3             | ADGRL3_tv1         | 2.7 | 0.01 |
| WWC1               | WWC1               | 2.7 | 0.02 |
| ELN                | ELN                | 2.7 | 0.01 |
| MAP1A              | MAP1A              | 2.7 | 0    |
| ZNF503             | ZNF503             | 2.7 | 0    |
| ABCA9              | ABCA9_tv1          | 2.7 | 0    |
| PHF2               | PHF2               | 2.7 | 0    |
| ABLIM2             | ABLIM2_tv1         | 2.7 | 0.04 |
| SPACA6             | SPACA6             | 2.7 | 0.01 |
| MFAP2              | MFAP2              | 2.7 | 0.02 |
| FLNA               | FLNA_tv1           | 2.7 | 0    |
| ENSSSCG00000041780 | ENSSSCG00000041780 | 2.7 | 0.05 |
| COL4A2             | COL4A2             | 2.7 | 0    |
| PKD1               | PKD1               | 2.6 | 0    |
| PPP1R12B           | PPP1R12B           | 2.6 | 0    |
| TPM2               | TPM2               | 2.6 | 0.03 |
| SCARF2             | SCARF2             | 2.6 | 0    |
| COL6A1             | COL6A1             | 2.6 | 0.01 |
| COL7A1             | COL7A1_tv1         | 2.6 | 0.03 |
| CELSR1             | CELSR1             | 2.6 | 0    |
| TMEM120B           | TMEM120B           | 2.6 | 0.02 |
| ACTN1              | ACTN1              | 2.6 | 0.03 |
| JAG2               | JAG2_tv1           | 2.6 | 0    |
| TIGD7              | TIGD7              | 2.6 | 0.04 |
| ANO1               | ANO1               | 2.6 | 0    |
| NR2F2              | NR2F2              | 2.6 | 0    |
| ITGA7              | ITGA7              | 2.6 | 0    |
| PLXNB3             | PLXNB3             | 2.6 | 0    |
| ENSSSCG00000051659 | ENSSSCG00000051659 | 2.5 | 0    |
| TRPV4              | TRPV4              | 2.5 | 0.02 |
| CCDC102A           | CCDC102A           | 2.5 | 0    |
| MOB2               | MOB2               | 2.5 | 0.01 |
| SPOCK1             | SPOCK1             | 2.5 | 0    |
| ENSSSCG00000049957 | ENSSSCG00000049957 | 2.5 | 0.05 |
| HIRIP3             | HIRIP3_tv1         | 2.5 | 0    |
| HLX                | HLX_tv1            | 2.5 | 0    |
| FOXC1              | FOXC1              | 2.5 | 0.03 |
| THSD4              | THSD4_tvX1         | 2.5 | 0.02 |

|                    |                    |     |      |
|--------------------|--------------------|-----|------|
| ANKRD24            | ANKRD24            | 2.5 | 0    |
| RTN4RL1            | RTN4RL1            | 2.5 | 0.01 |
| KIFC3              | KIFC3              | 2.5 | 0    |
| TNFRSF6B           | ENSSSCG00000036595 | 2.5 | 0.01 |
| ENSSSCG00000049992 | ENSSSCG00000049992 | 2.5 | 0.01 |
| NR1H2              | NR1H2              | 2.5 | 0.01 |
| EFNB3              | EFNB3              | 2.5 | 0.02 |
| DZIP1L             | DZIP1L_tv1         | 2.5 | 0.05 |
| MRC2               | MRC2               | 2.5 | 0    |
| PRKAR1B            | PRKAR1B            | 2.5 | 0    |
| NOTCH1             | NOTCH1             | 2.5 | 0    |
| PCDH12             | PCDH12             | 2.4 | 0    |
| NTN3               | NTN3               | 2.4 | 0.02 |
| TBXA2R             | TBXA2R             | 2.4 | 0.02 |
| IGF2               | IGF2_tv1           | 2.4 | 0.01 |
| MFGE8              | MFGE8_tv3          | 2.4 | 0.01 |
| MROH5              | ENSSSCG00000033726 | 2.4 | 0.01 |
| H19                | H19_tv1            | 2.4 | 0    |
| IER5L              | IER5L_tv1          | 2.4 | 0    |
| SUSD2              | ENSSSCG00000025393 | 2.4 | 0.04 |
| PENK               | PENK               | 2.4 | 0    |
| CROCC              | CROCC_tv           | 2.4 | 0.01 |
| NIPAL4             | NIPAL4             | 2.4 | 0.03 |
| AP2A1              | AP2A1              | 2.4 | 0    |
| PIEZO1             | PIEZO1             | 2.4 | 0    |
| ROBO4              | ROBO4              | 2.4 | 0    |
| PTRF               | PTRF               | 2.4 | 0    |
| HR                 | HR                 | 2.4 | 0.01 |
| CALD1              | CALD1_tv1          | 2.4 | 0    |
| CCDC106            | CCDC106            | 2.4 | 0.03 |
| EFCC1              | EFCC1              | 2.4 | 0    |
| TNR                | TNR                | 2.4 | 0.01 |
| MAPKAPK2           | MAPKAPK2           | 2.4 | 0.01 |
| COL4A1             | COL4A1             | 2.4 | 0    |
| SMAD7              | SMAD7              | 2.4 | 0.01 |
| EHBP1L1            | EHBP1L1_tvX1       | 2.4 | 0    |
| DCHS1              | DCHS1_tv1          | 2.4 | 0    |
| PTGDS              | PTGDS              | 2.4 | 0.05 |
| SDK1               | SDK1               | 2.4 | 0.01 |
| VWF                | VWF                | 2.4 | 0    |
| EIF5B              | EIF5B              | 2.4 | 0    |
| LTBP1              | LTBP1_tv1          | 2.4 | 0.04 |
| IQANK1             | IQANK1             | 2.4 | 0.01 |
| LDLRAD2            | LDLRAD2            | 2.4 | 0.01 |
| SYNGAP1            | SYNGAP1            | 2.3 | 0.01 |
| TMEM214            | TMEM214_tv2        | 2.3 | 0    |
| SSC5D              | SSC5D_tv1          | 2.3 | 0.02 |

|           |                    |     |      |
|-----------|--------------------|-----|------|
| PIK3R2    | PIK3R2             | 2.3 | 0.05 |
| GPRC5C    | GPRC5C             | 2.3 | 0    |
| LRRC3     | LRRC3              | 2.3 | 0.04 |
| SHB       | SHB                | 2.3 | 0    |
| SH3TC1    | SH3TC1             | 2.3 | 0    |
| CAMK2N1   | ENSSSCG00000024009 | 2.3 | 0.01 |
| FTH1P1    | FTH1P1             | 2.3 | 0.01 |
| TBX6      | TBX6               | 2.3 | 0.04 |
| FAM171A2  | FAM171A2           | 2.3 | 0    |
| TRPM4     | TRPM4              | 2.3 | 0.01 |
| ADAMTS7   | ADAMTS7            | 2.3 | 0    |
| RBM19     | RBM19              | 2.3 | 0.04 |
| MYH7B     | MYH7B_tv1          | 2.3 | 0    |
| ASTN1     | ASTN1_tvX1         | 2.3 | 0    |
| PLEKHA6   | PLEKHA6            | 2.3 | 0.02 |
| TNFRSF11A | TNFRSF11A          | 2.3 | 0    |
| THBS4     | THBS4              | 2.3 | 0    |
| COL5A1    | COL5A1             | 2.3 | 0.05 |
| GREB1     | GREB1              | 2.3 | 0    |
| ADGRA2    | ADGRA2_tv1         | 2.3 | 0    |
| RPS6KA2   | RPS6KA2            | 2.3 | 0    |
| SEMA6B    | SEMA6B             | 2.3 | 0    |
| TRIM16    | TRIM16_tv1         | 2.3 | 0.02 |
| EMILIN1   | EMILIN1            | 2.3 | 0    |
| TSPAN9    | TSPAN9_tv1         | 2.3 | 0    |
| BCL3      | BCL3_tvX1          | 2.3 | 0    |
| DYSF      | DYSF               | 2.3 | 0    |
| LIMS2     | LIMS2              | 2.3 | 0.01 |
| RHOG      | ENSSSCG00000039656 | 2.2 | 0.03 |
| TP53INP2  | TP53INP2_tv1       | 2.2 | 0.01 |
| PDE2A     | PDE2A              | 2.2 | 0    |
| SOX18     | SOX18              | 2.2 | 0    |
| CEP250    | CEP250             | 2.2 | 0    |
| NGFR      | NGFR               | 2.2 | 0.01 |
| ARHGAP39  | ARHGAP39           | 2.2 | 0.01 |
| BGN       | BGN                | 2.2 | 0.01 |
| APBB2     | APBB2              | 2.2 | 0.02 |
| CA11      | CA11_tv1           | 2.2 | 0    |
| EPHB3     | EPHB3              | 2.2 | 0    |
| FAM155A   | FAM155A            | 2.2 | 0.05 |
| FGF22     | FGF22_tvX1         | 2.2 | 0.05 |
| PLSCR3    | PLSCR3             | 2.2 | 0    |
| CDH5      | CDH5               | 2.2 | 0    |
| BOK       | BOK_tv1            | 2.2 | 0.04 |
| MYADM     | MYADM_tv2          | 2.2 | 0    |
| FAM43A    | FAM43A             | 2.2 | 0    |
| PLXND1    | PLXND1             | 2.2 | 0    |

|              |                    |     |      |
|--------------|--------------------|-----|------|
| PDE10A       | PDE10A             | 2.2 | 0.02 |
| KCNN3        | KCNN3              | 2.2 | 0.01 |
| PDXK         | PDXK               | 2.2 | 0.02 |
| CREB3L1      | CREB3L1            | 2.2 | 0    |
| FGFR1        | FGFR1              | 2.2 | 0.01 |
| ARHGEF17     | ARHGEF17_tvX1      | 2.2 | 0    |
| SLC38A10     | SLC38A10_tv1       | 2.2 | 0    |
| SLC45A4      | SLC45A4            | 2.2 | 0.01 |
| AEBP1        | AEBP1              | 2.2 | 0.02 |
| ZC3H3        | ZC3H3              | 2.2 | 0.04 |
| TRIOBP       | TRIOBP_tv1         | 2.2 | 0    |
| PRAG1        | PRAG1_tvX1         | 2.2 | 0    |
| ATOH8        | ATOH8              | 2.2 | 0.05 |
| CCM2L        | CCM2L              | 2.2 | 0    |
| AFAP1L1      | AFAP1L1            | 2.2 | 0    |
| SHANK3       | SHANK3             | 2.2 | 0    |
| DES          | DES                | 2.2 | 0.02 |
| ARHGEF40     | ARHGEF40           | 2.2 | 0    |
| MYLK         | MYLK               | 2.2 | 0    |
| RELA         | RELA               | 2.2 | 0.04 |
| AS3MT        | AS3MT              | 2.2 | 0.02 |
| PTPN6        | PTPN6              | 2.2 | 0    |
| ADGRF5       | ADGRF5             | 2.2 | 0.02 |
| CARNS1       | CARNS1             | 2.2 | 0.02 |
| NFIX         | NFIX               | 2.2 | 0    |
| SOX7         | ENSSSCG00000031889 | 2.2 | 0.04 |
| SMAD6        | SMAD6              | 2.2 | 0.02 |
| WDR86        | WDR86_tv2          | 2.2 | 0.03 |
| FLT1         | FLT1_tv1           | 2.2 | 0    |
| SLX4         | SLX4_tv1           | 2.2 | 0.02 |
| ZC3H13       | ZC3H13_tvX8        | 2.2 | 0    |
| FAM124B      | FAM124B            | 2.2 | 0.03 |
| GPR173       | GPR173             | 2.2 | 0    |
| SEMA3F       | SEMA3F             | 2.2 | 0.01 |
| SEPTIN8      | SEPTIN8            | 2.1 | 0.01 |
| SCN1B        | SCN1B              | 2.1 | 0    |
| COL9A2       | COL9A2             | 2.1 | 0.01 |
| ZNF853       | ZNF853             | 2.1 | 0    |
| ZNF316       | ZNF316             | 2.1 | 0.01 |
| LOC110260611 | ENSSSCG00000035352 | 2.1 | 0.05 |
| ARAP3        | ARAP3              | 2.1 | 0    |
| TCHP         | TCHP               | 2.1 | 0    |
| SLC6A17      | SLC6A17            | 2.1 | 0.04 |
| P3H3         | P3H3               | 2.1 | 0.01 |
| LAMB3        | LAMB3_tv1          | 2.1 | 0.02 |
| SPRY4        | SPRY4              | 2.1 | 0.01 |
| UVSSA        | UVSSA              | 2.1 | 0    |

|          |             |     |      |
|----------|-------------|-----|------|
| OS9      | OS9_tv1     | 2.1 | 0    |
| PPRC1    | PPRC1       | 2.1 | 0    |
| AGRN     | AGRN        | 2.1 | 0    |
| DIPK2B   | DIPK2B      | 2.1 | 0.04 |
| TLN1     | TLN1        | 2.1 | 0    |
| WFS1     | WFS1        | 2.1 | 0    |
| CDH24    | CDH24_tv2   | 2.1 | 0.01 |
| NIBAN2   | NIBAN2      | 2.1 | 0.02 |
| BCL9L    | BCL9L       | 2.1 | 0    |
| PDGFRB   | PDGFRB      | 2.1 | 0    |
| ZBTB46   | ZBTB46_tvX3 | 2.1 | 0    |
| ZNF467   | ZNF467_tv1  | 2.1 | 0.02 |
| CPXM2    | CPXM2       | 2.1 | 0.02 |
| LIPE     | LIPE        | 2.1 | 0.03 |
| PER2     | PER2        | 2.1 | 0.01 |
| LRATD2   | LRATD2      | 2.1 | 0.01 |
| SELENOO  | SELENOO     | 2.1 | 0.01 |
| SLC2A10  | SLC2A10     | 2.1 | 0.03 |
| KCNK12   | KCNK12      | 2.1 | 0.01 |
| GJA4     | GJA4        | 2.1 | 0    |
| MMP15    | MMP15       | 2.1 | 0    |
| MAP2K7   | MAP2K7      | 2.1 | 0.04 |
| HNRNPUL2 | HNRNPUL2    | 2.1 | 0    |
| LAMC1    | LAMC1       | 2.1 | 0    |
| LAMB2    | LAMB2       | 2.1 | 0    |
| TIE1     | TIE1        | 2.1 | 0    |
| LTBP4    | LTBP4       | 2.1 | 0    |
| FHAD1    | FHAD1       | 2.1 | 0.04 |
| BCAM     | BCAM_tv1    | 2.1 | 0    |
| POLR2A   | POLR2A      | 2.1 | 0.01 |
| SRCAP    | SRCAP_tv1   | 2.1 | 0    |
| PAPLN    | PAPLN       | 2.1 | 0    |
| CSPG4    | CSPG4       | 2.1 | 0    |
| PPFIBP2  | PPFIBP2     | 2.1 | 0.01 |
| IGFBP5   | IGFBP5      | 2.1 | 0    |
| JUP      | JUP         | 2.1 | 0.01 |
| UNC5B    | UNC5B       | 2.1 | 0    |
| KIAA0930 | KIAA0930    | 2.1 | 0.04 |
| IGFBP7   | IGFBP7      | 2.1 | 0.01 |
| EGR1     | EGR1        | 2.1 | 0    |
| LOXL3    | LOXL3       | 2.1 | 0.01 |
| FADD     | FADD        | 2.1 | 0.04 |
| TCOF1    | TCOF1_tvX3  | 2.1 | 0    |
| CRTC1    | CRTC1       | 2.1 | 0.04 |
| ENG      | ENG_tv1     | 2.1 | 0    |
| DENND2B  | DENND2B     | 2.1 | 0    |
| SMTN     | SMTN        | 2.1 | 0    |



|              |                    |     |      |
|--------------|--------------------|-----|------|
| AKAP12       | AKAP12             | 2.1 | 0    |
| CUEDC1       | CUEDC1             | 2.1 | 0.04 |
| BICRA        | BICRA              | 2.1 | 0    |
| SLC3A2       | SLC3A2_tv1         | 2.1 | 0    |
| CHD7         | CHD7_tv1           | 2.1 | 0.01 |
| MAP2K3       | MAP2K3             | 2.1 | 0.04 |
| HSPA12B      | HSPA12B            | 2.1 | 0.01 |
| MRPL58       | MRPL58             | 2.1 | 0.01 |
| LOC110257381 | ENSSSCG00000044439 | 2.1 | 0.03 |
| CCND1        | CCND1              | 2.1 | 0    |
| EMID1        | EMID1              | 2.1 | 0.01 |
| STK24        | STK24              | 2.1 | 0.01 |
| SOGA1        | SOGA1              | 2.1 | 0    |
| PLXDC2       | PLXDC2_tv1         | 2.1 | 0.04 |
| TSPAN15      | TSPAN15_tv1        | 2.1 | 0.01 |
| ERBB3        | ERBB3_tv1          | 2   | 0.01 |
| ETV6         | ETV6               | 2   | 0.01 |
| CDR2         | CDR2               | 2   | 0.04 |
| MTA1         | MTA1_tv1           | 2   | 0.05 |
| CBX6         | CBX6               | 2   | 0    |
| ABCC10       | ABCC10             | 2   | 0.04 |
| FZD8         | FZD8               | 2   | 0    |
| SLC22A17     | SLC22A17           | 2   | 0.05 |
| GALNT18      | GALNT18            | 2   | 0.04 |
| MAP7D1       | MAP7D1_tv1         | 2   | 0    |
| FBLN2        | FBLN2              | 2   | 0    |
| DAAM2        | DAAM2_tv1          | 2   | 0    |
| NCL          | NCL                | 2   | 0    |
| TNK2         | TNK2_tv1           | 2   | 0    |
| OSBPL5       | OSBPL5_tv1         | 2   | 0.02 |
| TRAF7        | TRAF7              | 2   | 0.03 |
| CHST1        | CHST1              | 2   | 0    |
| LAMC3        | LAMC3_tv1          | 2   | 0    |
| KIF7         | KIF7               | 2   | 0    |
| PCNT         | PCNT_tv1           | 2   | 0    |
| ZSCAN20      | ENSSSCG00000042252 | 2   | 0.01 |
| PMEPA1       | PMEPA1             | 2   | 0    |
| SHROOM1      | SHROOM1            | 2   | 0.02 |
| RARG         | RARG_tv2           | 2   | 0.03 |
| FLT4         | FLT4               | 2   | 0    |
| DYNC1H1      | DYNC1H1            | 2   | 0.01 |
| NSD2         | NSD2               | 2   | 0.02 |
| DAP          | DAP                | 2   | 0.01 |
| TAF3         | TAF3               | 2   | 0    |
| NRAP         | NRAP               | 2   | 0.01 |
| CARD10       | CARD10             | 2   | 0    |
| SKI          | SKI                | 2   | 0    |

|          |                    |   |      |
|----------|--------------------|---|------|
| MEX3D    | MEX3D              | 2 | 0.04 |
| EHD3     | EHD3               | 2 | 0    |
| CDK18    | CDK18_tv3          | 2 | 0    |
| AGPAT3   | AGPAT3             | 2 | 0.01 |
| BCORL1   | BCORL1             | 2 | 0.01 |
| SHROOM2  | SHROOM2            | 2 | 0.02 |
| CASKIN1  | CASKIN1            | 2 | 0.04 |
| NCK2     | NCK2               | 2 | 0.03 |
| NOS1AP   | NOS1AP             | 2 | 0.01 |
| PLEKHG2  | PLEKHG2_tvX3       | 2 | 0    |
| EIF3A    | EIF3A              | 2 | 0    |
| BAHCC1   | ENSSSCG00000023045 | 2 | 0    |
| MVD      | MVD                | 2 | 0    |
| TSPAN11  | TSPAN11_tv1        | 2 | 0.01 |
| SYT9     | SYT9               | 2 | 0.02 |
| DOC2B    | DOC2B              | 2 | 0    |
| MED24    | MED24              | 2 | 0.01 |
| SCD      | SCD                | 2 | 0    |
| MPRIP    | MPRIP              | 2 | 0    |
| MYO19    | MYO19              | 2 | 0.02 |
| PRR12    | PRR12_tv1          | 2 | 0    |
| HDGFRP2  | HDGFRP2_tv1        | 2 | 0    |
| TRIM26   | TRIM26             | 2 | 0.03 |
| FILIP1   | FILIP1             | 2 | 0.02 |
| TAF15    | TAF15              | 2 | 0    |
| NFIC     | NFIC               | 2 | 0    |
| AFDN     | AFDN_tvX10         | 2 | 0    |
| PHRF1    | PHRF1              | 2 | 0    |
| IMPDH1   | IMPDH1             | 2 | 0.02 |
| ARID1A   | ARID1A_tv1         | 2 | 0    |
| SPNS2    | SPNS2              | 2 | 0    |
| EPN2     | EPN2               | 2 | 0    |
| SLC38A5  | SLC38A5            | 2 | 0    |
| TNRC18   | TNRC18             | 2 | 0.01 |
| N4BP3    | N4BP3              | 2 | 0    |
| NBEAL2   | NBEAL2_tv1         | 2 | 0    |
| BAG3     | BAG3               | 2 | 0    |
| LTBP3    | LTBP3              | 2 | 0    |
| CHD3     | CHD3_tv1           | 2 | 0    |
| FAM129B  | FAM129B            | 2 | 0    |
| COL24A1  | ENSSSCG00000031738 | 2 | 0.03 |
| CDC42EP1 | CDC42EP1           | 2 | 0    |
| ALS2CL   | ALS2CL_tv1         | 2 | 0.01 |
| PPP4C    | PPP4C              | 2 | 0.02 |
| GPR35    | GPR35              | 2 | 0.01 |
| PIK3R2   | PIK3R2             | 2 | 0    |
| EML3     | EML3               | 2 | 0.02 |

|              |                    |    |      |
|--------------|--------------------|----|------|
| ACVRL1       | ACVRL1_tv1         | 2  | 0    |
| PPP1R9B      | PPP1R9B            | 2  | 0    |
| TGFB111      | TGFB111            | 2  | 0.05 |
| OLFML2A      | OLFML2A_tv1        | 2  | 0    |
| ZNF276       | ZNF276_tva         | 2  | 0    |
| CARF         | CARF               | -2 | 0    |
| PDK4         | PDK4               | -2 | 0.02 |
| MIS12        | MIS12_tv3          | -2 | 0    |
| QRSL1        | QRSL1              | -2 | 0    |
| HBP1         | HBP1_tv1           | -2 | 0    |
| BBS10        | BBS10              | -2 | 0.04 |
| PSAT1        | PSAT1_tv1          | -2 | 0    |
| GAS2L3       | GAS2L3             | -2 | 0    |
| NR1D2        | NR1D2_tv1          | -2 | 0    |
| CDKL3        | CDKL3              | -2 | 0.04 |
| COMMD2       | COMMD2             | -2 | 0    |
| VAMP7        | VAMP7              | -2 | 0    |
| SESN1        | SESN1_tv1          | -2 | 0    |
| DRG1         | DRG1               | -2 | 0    |
| SPCS3        | SPCS3              | -2 | 0    |
| METTL8       | METTL8_tv1         | -2 | 0.01 |
| IMMP1L       | IMMP1L             | -2 | 0.01 |
| TRIQK        | TRIQK              | -2 | 0.01 |
| PRKCI        | PRKCI              | -2 | 0    |
| SLC7A11      | SLC7A11            | -2 | 0.01 |
| LOC106508844 | ENSSSCG00000050757 | -2 | 0.04 |
| LSM5         | ENSSSCG00000026064 | -2 | 0.01 |
| PRIM1        | ENSSSCG00000026055 | -2 | 0    |
| PRDX2        | PRDX2              | -2 | 0    |
| ATP1B3       | ATP1B3             | -2 | 0    |
| CETN2        | ENSSSCG00000012757 | -2 | 0    |
| MRPS36       | MRPS36             | -2 | 0    |
| FCF1         | FCF1               | -2 | 0    |
| C4orf46      | C4orf46            | -2 | 0.02 |
| PRPF39       | PRPF39             | -2 | 0    |
| PNRC2        | PNRC2              | -2 | 0    |
| C17orf75     | C17orf75           | -2 | 0.01 |
| KLHL28       | KLHL28             | -2 | 0    |
| ORC6         | ORC6               | -2 | 0    |
| C18orf21     | C18orf21           | -2 | 0    |
| ZC2HC1A      | ZC2HC1A            | -2 | 0.01 |
| CGRRF1       | CGRRF1             | -2 | 0    |
| NDUFV2       | NDUFV2             | -2 | 0    |
| MSR1         | MSR1_tvSR-II       | -2 | 0.04 |
| CENPH        | CENPH              | -2 | 0.01 |
| PCNA         | PCNA               | -2 | 0    |
| ASB9         | ASB9               | -2 | 0.01 |

|              |                    |    |      |
|--------------|--------------------|----|------|
| GSTA2        | GSTA2              | -2 | 0    |
| EIF1AX       | EIF1AX             | -2 | 0    |
| ZSCAN31      | ZSCAN31            | -2 | 0.01 |
| FBXO8        | FBXO8              | -2 | 0.01 |
| LOC102160564 | ENSSSCG00000041434 | -2 | 0.01 |
| RFC4         | RFC4_tv1           | -2 | 0    |
| PTP4A1       | PTP4A1             | -2 | 0    |
| PPIB         | PPIB               | -2 | 0    |
| UXT          | UXT                | -2 | 0.02 |
| PMPCB        | PMPCB              | -2 | 0    |
| COMMD6       | COMMD6_tv2         | -2 | 0    |
| TBC1D15      | TBC1D15            | -2 | 0    |
| TRIM59       | TRIM59_tv1         | -2 | 0    |
| CCDC32       | CCDC32             | -2 | 0    |
| PRXL2A       | PRXL2A_tv4         | -2 | 0    |
| ATP6AP2      | ATP6AP2            | -2 | 0    |
| ZNF350       | ZNF350             | -2 | 0.02 |
| PRORS1       | ENSSSCG00000037399 | -2 | 0.04 |
| ACTR10       | ACTR10             | -2 | 0    |
| EXOSC8       | EXOSC8             | -2 | 0.01 |
| TMEM126A     | TMEM126A           | -2 | 0    |
| UFM1         | UFM1               | -2 | 0    |
| ATL2         | ATL2               | -2 | 0    |
| LOC100627283 | ENSSSCG00000030015 | -2 | 0    |
| SH3BGR1      | ENSSSCG00000012452 | -2 | 0    |
| RBM46        | RBM46              | -2 | 0.04 |
| SRSF7        | SRSF7              | -2 | 0    |
| TMEM263      | TMEM263            | -2 | 0    |
| SOHLH2       | ENSSSCG00000026564 | -2 | 0.02 |
| NUP35        | NUP35              | -2 | 0    |
| RBIS         | RBIS               | -2 | 0    |
| C21orf91     | C21orf91           | -2 | 0    |
| CLEC2D       | CLEC2D_tv1         | -2 | 0    |
| SMARCE1      | SMARCE1            | -2 | 0    |
| LOC100626258 | ENSSSCG00000044256 | -2 | 0.04 |
| C12orf29     | C12orf29           | -2 | 0.02 |
| TAF1D        | TAF1D              | -2 | 0    |
| THAP6        | THAP6              | -2 | 0    |
| GNPNAT1      | GNPNAT1            | -2 | 0    |
| SMIM19       | SMIM19             | -2 | 0    |
| ZNF548L      | ZNF548L            | -2 | 0.01 |
| HSF2         | HSF2_tv1           | -2 | 0    |
| RRAGD        | RRAGD              | -2 | 0.01 |
| TPST2        | TPST2              | -2 | 0    |
| CSE1L        | CSE1L_tv           | -2 | 0    |
| SMDT1        | SMDT1              | -2 | 0    |
| OSTC         | OSTC               | -2 | 0    |

|          |                    |      |      |
|----------|--------------------|------|------|
| UBE2B    | UBE2B              | -2   | 0    |
| CYCS     | CYCS               | -2   | 0    |
| C8orf76  | ENSSSCG00000021744 | -2   | 0.01 |
| PFDN4    | PFDN4              | -2   | 0    |
| ORC4     | ORC4               | -2   | 0    |
| DSCC1    | DSCC1              | -2   | 0.03 |
| BORCS7   | BORCS7             | -2   | 0    |
| CHODL    | CHODL              | -2   | 0    |
| TNFSF10  | TNFSF10_tv1        | -2   | 0.01 |
| UQCR10   | UQCR10             | -2   | 0    |
| NPL      | NPL                | -2   | 0    |
| C1D      | ENSSSCG00000039331 | -2   | 0    |
| CUTC     | CUTC_tv1           | -2   | 0    |
| CYB5A    | CYB5A              | -2   | 0    |
| IER3IP1  | IER3IP1            | -2   | 0    |
| FUNDC1   | FUNDC1             | -2   | 0    |
| METTL5   | METTL5             | -2   | 0    |
| S100A2   | S100A2_tv          | -2   | 0.04 |
| FANCD2   | FANCD2_tv2         | -2   | 0.01 |
| PIH1D2   | PIH1D2             | -2   | 0.04 |
| RPS4X    | RPS4X              | -2   | 0    |
| TPRKB    | TPRKB              | -2   | 0    |
| GIN1     | GIN1               | -2   | 0    |
| PAIP1    | PAIP1              | -2   | 0    |
| NUBPL    | NUBPL              | -2   | 0    |
| RPL7A    | RPL7A              | -2   | 0    |
| FGFR1OP2 | FGFR1OP2           | -2   | 0    |
| NIT2     | NIT2               | -2   | 0    |
| UQCRQ    | UQCRQ              | -2   | 0    |
| ACP1     | ACP1_tv3           | -2   | 0    |
| TRIM23   | TRIM23_tv1         | -2   | 0    |
| CFAP20   | CFAP20             | -2   | 0    |
| BOLA1    | BOLA1              | -2   | 0    |
| RPL13A   | RPL13A_tv          | -2   | 0    |
| COMMD3   | COMMD3             | -2   | 0    |
| AK3      | AK3                | -2   | 0.05 |
| TNFRSF17 | TNFRSF17           | -2   | 0.01 |
| SUCLG2   | SUCLG2_tv2         | -2   | 0    |
| ERGIC2   | ERGIC2             | -2   | 0    |
| PI15     | PI15               | -2   | 0    |
| CXADR    | CXADR_tv1          | -2   | 0    |
| YOD1     | YOD1               | -2   | 0.01 |
| BZW1     | BZW1               | -2   | 0    |
| VCPKMT   | VCPKMT             | -2   | 0.01 |
| PDIK1L   | PDIK1L             | -2   | 0    |
| MIR9810  | MIR9810            | -2   | 0.01 |
| ATP5C1   | ATP5C1_tv1         | -2.1 | 0    |

|              |                    |      |      |
|--------------|--------------------|------|------|
| UBE2L6       | UBE2L6_tv2         | -2.1 | 0    |
| RPS3A        | RPS3A              | -2.1 | 0    |
| DPM1         | DPM1               | -2.1 | 0    |
| C3orf38      | C3orf38            | -2.1 | 0    |
| PPT1         | PPT1               | -2.1 | 0    |
| ZNF569       | ZNF569_tv1         | -2.1 | 0    |
| ZNF410       | ZNF410_tv2         | -2.1 | 0    |
| ZNF33BL      | ZNF33BL            | -2.1 | 0.02 |
| ARMT1        | ARMT1_tv1          | -2.1 | 0    |
| PIGF         | PIGF               | -2.1 | 0.01 |
| GPBP1        | GPBP1_tv1          | -2.1 | 0    |
| BLOC1S6      | BLOC1S6            | -2.1 | 0    |
| FCGR1A       | FCGR1A             | -2.1 | 0    |
| CST15        | ENSSSCG00000007123 | -2.1 | 0.03 |
| SLC25A40     | SLC25A40           | -2.1 | 0    |
| NAE1         | NAE1               | -2.1 | 0    |
| ITM2B        | ITM2B              | -2.1 | 0    |
| RPL10        | RPL10_tv1          | -2.1 | 0    |
| WDR61        | WDR61_tv2          | -2.1 | 0    |
| COX7C        | COX7C              | -2.1 | 0    |
| STK26        | STK26_tv1          | -2.1 | 0.01 |
| RPS4XPs*     | ENSSSCG00000022191 | -2.1 | 0    |
| EEF1B2       | EEF1B2             | -2.1 | 0    |
| CCT4         | CCT4               | -2.1 | 0    |
| NDUFAF4      | NDUFAF4            | -2.1 | 0.02 |
| RPL38        | RPL38              | -2.1 | 0    |
| NDUFA12      | NDUFA12            | -2.1 | 0    |
| ESCO2        | ENSSSCG00000009670 | -2.1 | 0.03 |
| PTTG1        | ENSSSCG00000017032 | -2.1 | 0    |
| SLC30A6      | SLC30A6            | -2.1 | 0    |
| UBA6         | UBA6               | -2.1 | 0    |
| MTERF1       | MTERF1             | -2.1 | 0    |
| LOC100155572 | ENSSSCG00000002045 | -2.1 | 0    |
| GSTM3        | GSTM3_tv1          | -2.1 | 0.04 |
| MOGAT2       | MOGAT2             | -2.1 | 0.04 |
| TOMM22       | ENSSSCG00000000097 | -2.1 | 0    |
| ZNF649       | ZNF649             | -2.1 | 0.04 |
| TEFM         | TEFM               | -2.1 | 0    |
| LGI2         | LGI2               | -2.1 | 0.01 |
| FXD2         | ENSSSCG00000015084 | -2.1 | 0.03 |
| ARSB         | ARSB               | -2.1 | 0.01 |
| TMSB10       | TMSB10             | -2.1 | 0.01 |
| SLC35F4      | SLC35F4            | -2.1 | 0    |
| CCL25        | CCL25_tvX6         | -2.1 | 0.04 |
| OSGEPL1      | OSGEPL1            | -2.1 | 0    |
| TATDN3       | TATDN3             | -2.1 | 0    |
| HNMT         | HNMT_tv1           | -2.1 | 0    |

|                    |                    |      |      |
|--------------------|--------------------|------|------|
| VPS26A             | VPS26A_tv1         | -2.1 | 0    |
| LncRNA             | LncRNA             | -2.1 | 0.01 |
| MBD4               | MBD4               | -2.1 | 0.02 |
| PPP1CC             | PPP1CC_tv1         | -2.1 | 0    |
| ZNF350L2*          | ZNF350L2*          | -2.1 | 0.02 |
| DECR1              | DECR1              | -2.1 | 0    |
| FAM227B            | FAM227B            | -2.1 | 0.02 |
| TMEM14A            | TMEM14A            | -2.1 | 0    |
| SNX4               | SNX4               | -2.1 | 0    |
| ABHD11             | ABHD11_tv1         | -2.1 | 0.02 |
| ANAPC13            | ANAPC13            | -2.1 | 0    |
| KIAA1143           | KIAA1143           | -2.1 | 0.01 |
| MRPS28             | MRPS28             | -2.1 | 0    |
| SCOC               | SCOC               | -2.1 | 0    |
| ELMOD2             | ELMOD2_tv1         | -2.1 | 0    |
| THOC7              | THOC7              | -2.1 | 0    |
| CETN3              | CETN3              | -2.1 | 0    |
| HSPA13             | HSPA13             | -2.1 | 0    |
| SLC35A1            | SLC35A1            | -2.1 | 0    |
| KBTBD8             | KBTBD8             | -2.1 | 0.01 |
| BCAS4              | BCAS4_tv2          | -2.1 | 0.05 |
| CCT6A              | CCT6A_tv1          | -2.1 | 0    |
| RNF170             | RNF170_tv2         | -2.1 | 0    |
| RPL35              | RPL35              | -2.1 | 0    |
| EIF2S3             | EIF2S3             | -2.1 | 0    |
| UCHL3              | UCHL3              | -2.1 | 0    |
| TRAPPC5            | TRAPPC5            | -2.1 | 0    |
| ENSSSCG00000046793 | ENSSSCG00000046793 | -2.1 | 0.01 |
| EIF3E              | EIF3E              | -2.1 | 0    |
| IRAK1BP1           | IRAK1BP1           | -2.1 | 0    |
| LIAS               | LIAS               | -2.1 | 0    |
| CST9L              | CST9L              | -2.1 | 0.03 |
| TNNT1              | TNNT1              | -2.1 | 0.01 |
| TMEM70             | TMEM70             | -2.1 | 0    |
| ATP6V1G1           | ATP6V1G1           | -2.1 | 0    |
| TMEM128            | TMEM128            | -2.1 | 0    |
| MRPL22             | MRPL22             | -2.1 | 0    |
| ARMC1              | ARMC1              | -2.1 | 0    |
| ZNF134             | ZNF134_tv1         | -2.1 | 0    |
| YPEL5              | YPEL5              | -2.1 | 0    |
| TMEM256            | ENSSSCG00000037071 | -2.1 | 0.01 |
| MAGOHB             | MAGOHB             | -2.1 | 0    |
| HINT1              | HINT1              | -2.1 | 0    |
| ZNF711             | ZNF711             | -2.1 | 0    |
| RPS27A             | RPS27A             | -2.1 | 0    |
| CCDC191            | CCDC191            | -2.1 | 0    |
| AIMP1              | AIMP1_tv3          | -2.1 | 0.05 |

|          |                    |      |      |
|----------|--------------------|------|------|
| FYTTD1   | FYTTD1             | -2.1 | 0    |
| CCT2     | CCT2_tv1           | -2.1 | 0    |
| SNRPB2   | ENSSSCG00000037602 | -2.1 | 0    |
| NDUFB1   | NDUFB1             | -2.1 | 0    |
| CTNNB1   | CTNNB1_tv1         | -2.1 | 0.02 |
| PKIA     | PKIA               | -2.1 | 0    |
| LncRNA   | LncRNA             | -2.1 | 0    |
| UBE2L3   | UBE2L3_tv1         | -2.1 | 0    |
| RPS13    | RPS13              | -2.2 | 0    |
| KRT10    | KRT10              | -2.2 | 0    |
| GLRX2    | GLRX2_tv2          | -2.2 | 0    |
| CCDC58   | CCDC58             | -2.2 | 0    |
| FKBP3    | FKBP3_tv1          | -2.2 | 0    |
| DDX46    | DDX46              | -2.2 | 0.02 |
| CROT     | CROT_tv2           | -2.2 | 0    |
| CD24     | CD24               | -2.2 | 0    |
| CSRNP3   | CSRNP3_tv1         | -2.2 | 0    |
| NDUFB9   | NDUFB9             | -2.2 | 0    |
| NUP54    | NUP54              | -2.2 | 0    |
| COMMD8   | COMMD8             | -2.2 | 0    |
| PSMA6    | PSMA6_tv2          | -2.2 | 0    |
| HGF      | HGF_tv1            | -2.2 | 0    |
| CREBRF   | CREBRF_tv1         | -2.2 | 0    |
| SMNDC1   | SMNDC1             | -2.2 | 0    |
| RAD51C   | RAD51C_tv1         | -2.2 | 0    |
| WDR89    | WDR89              | -2.2 | 0    |
| CMBL     | CMBL               | -2.2 | 0    |
| ADH5     | ADH5               | -2.2 | 0    |
| GPR34    | GPR34_tv1          | -2.2 | 0.04 |
| POP5     | POP5               | -2.2 | 0    |
| RPL5     | RPL5               | -2.2 | 0    |
| PPA1     | PPA1_tv1           | -2.2 | 0    |
| CHEK1    | CHEK1_tv1          | -2.2 | 0    |
| RGS1     | RGS1               | -2.2 | 0.02 |
| CDKN3    | CDKN3_tv1          | -2.2 | 0    |
| NUDT2    | NUDT2              | -2.2 | 0    |
| SH3BGRL2 | SH3BGRL2           | -2.2 | 0    |
| ZNF709   | ZNF709             | -2.2 | 0    |
| RBBP4    | RBBP4              | -2.2 | 0    |
| NSUN3    | NSUN3              | -2.2 | 0    |
| TMEM258  | ENSSSCG00000027538 | -2.2 | 0    |
| ADAM10   | ADAM10             | -2.2 | 0    |
| UNK156*  | ENSSSCG00000048074 | -2.2 | 0    |
| ACYP2    | ACYP2              | -2.2 | 0    |
| PRTFDC1  | PRTFDC1_tv1        | -2.2 | 0    |
| VPS29    | VPS29              | -2.2 | 0    |
| SNRPE    | SNRPE              | -2.2 | 0    |



|                    |                    |      |      |
|--------------------|--------------------|------|------|
| ENSSSCG00000051580 | ENSSSCG00000051580 | -2.2 | 0.04 |
| RTRAF              | RTRAF              | -2.2 | 0    |
| TXNIP              | TXNIP_tv1          | -2.2 | 0    |
| DUT                | DUT                | -2.2 | 0    |
| ELOF1              | ENSSSCG00000013613 | -2.2 | 0.02 |
| CMSS1              | CMSS1_tv1          | -2.2 | 0    |
| MRPL46             | MRPL46             | -2.2 | 0    |
| LOC102165822       | ENSSSCG00000036524 | -2.2 | 0.01 |
| GNG10              | GNG10_tv1          | -2.2 | 0    |
| INO80C             | INO80C             | -2.2 | 0.01 |
| RPL34              | RPL34              | -2.2 | 0    |
| GRIK1              | GRIK1              | -2.2 | 0.01 |
| MZT1               | MZT1               | -2.2 | 0    |
| RPS25              | ENSSSCG00000036296 | -2.2 | 0    |
| TRIM33             | TRIM33_tv          | -2.2 | 0    |
| RPL10A             | ENSSSCG00000011206 | -2.2 | 0.02 |
| ARL5B              | ARL5B              | -2.2 | 0    |
| PDCD1LG2           | PDCD1LG2           | -2.2 | 0.01 |
| MRPS23             | MRPS23             | -2.2 | 0    |
| RPL36AL            | RPL36AL_tv         | -2.2 | 0    |
| GPN3               | GPN3               | -2.2 | 0    |
| "MARCH7"           | MARCH7_tvX1        | -2.2 | 0    |
| KLHL7              | KLHL7_tv1          | -2.2 | 0    |
| RBBP8              | RBBP8_tv1          | -2.2 | 0.02 |
| CKS2               | CKS2               | -2.2 | 0    |
| SUCLG1             | SUCLG1             | -2.2 | 0    |
| EBAG9              | EBAG9_tv2          | -2.2 | 0.03 |
| COQ10B             | COQ10B             | -2.2 | 0    |
| ATP5MC3            | ATP5MC3            | -2.2 | 0    |
| AP3S1              | AP3S1_tv           | -2.2 | 0    |
| CBX3               | CBX3_tv1           | -2.2 | 0.02 |
| CASP6              | CASP6_tva          | -2.2 | 0    |
| GTPBP10            | GTPBP10            | -2.2 | 0    |
| ACTR6              | ACTR6              | -2.2 | 0    |
| TMPO-AS1           | TMPO-AS1           | -2.2 | 0.05 |
| WDR76              | WDR76              | -2.2 | 0    |
| PRDX3              | PRDX3              | -2.2 | 0    |
| NDUFS4             | NDUFS4             | -2.2 | 0    |
| MAT2B              | MAT2B              | -2.2 | 0    |
| SLC25A51           | SLC25A51           | -2.2 | 0    |
| ENSSSCG00000035571 | ENSSSCG00000035571 | -2.2 | 0.04 |
| TIMM9              | TIMM9_tv1          | -2.2 | 0    |
| GGCT               | ENSSSCG00000016679 | -2.2 | 0    |
| ARL6IP5            | ARL6IP5            | -2.2 | 0.02 |
| ASB5               | ASB5               | -2.2 | 0.03 |
| ENSSSCG00000049265 | ENSSSCG00000049265 | -2.2 | 0    |
| MT-TP              | ENSSSCG00000018096 | -2.2 | 0    |

|                    |                    |      |      |
|--------------------|--------------------|------|------|
| TANK               | TANK_tv1           | -2.2 | 0    |
| ANO5               | ANO5               | -2.2 | 0    |
| RAD17              | RAD17              | -2.2 | 0    |
| EIF4A2             | EIF4A2             | -2.2 | 0    |
| ELAVL2             | ELAVL2             | -2.2 | 0    |
| ZNF32              | ZNF32              | -2.2 | 0    |
| ARRDC3             | ARRDC3_tv1         | -2.2 | 0.01 |
| NDUFA2             | NDUFA2             | -2.2 | 0    |
| NAALAD2            | NAALAD2            | -2.2 | 0.01 |
| IL13RA2            | IL13RA2            | -2.3 | 0.01 |
| AZIN1              | AZIN1              | -2.3 | 0    |
| ENSSSCG00000042997 | ENSSSCG00000042997 | -2.3 | 0    |
| SMIM26             | SMIM26             | -2.3 | 0    |
| TRIML2             | TRIML2_tv2         | -2.3 | 0.04 |
| ZNF181             | ZNF181_tv1         | -2.3 | 0    |
| ANKRD37            | ANKRD37            | -2.3 | 0.04 |
| RBM7               | ENSSSCG00000027905 | -2.3 | 0    |
| RRM2B              | RRM2B_tv1          | -2.3 | 0    |
| TXNDC9             | TXNDC9             | -2.3 | 0    |
| ZNF329             | ZNF329             | -2.3 | 0    |
| SLITRK6            | SLITRK6            | -2.3 | 0.04 |
| PDCD4              | PDCD4              | -2.3 | 0    |
| LSM3               | LSM3               | -2.3 | 0    |
| RPL12              | RPL12              | -2.3 | 0    |
| ZBTB80S            | ZBTB80S            | -2.3 | 0    |
| TRIM13             | TRIM13             | -2.3 | 0    |
| ATP5PD             | ATP5PD             | -2.3 | 0    |
| CCNG2              | CCNG2              | -2.3 | 0    |
| ITPA               | ITPA               | -2.3 | 0    |
| ZBTB6              | ZBTB6              | -2.3 | 0    |
| EGFL6              | EGFL6              | -2.3 | 0.02 |
| ATP5F1E            | ENSSSCG00000007524 | -2.3 | 0    |
| ZBTB26             | ZBTB26             | -2.3 | 0    |
| CLCN5              | CLCN5              | -2.3 | 0    |
| GRB14              | GRB14              | -2.3 | 0    |
| CC2D2B             | CC2D2B_tvX1        | -2.3 | 0.03 |
| ARG1               | ARG1_tv2           | -2.3 | 0.01 |
| POLM               | ENSSSCG00000044483 | -2.3 | 0    |
| SENP8              | SENP8              | -2.3 | 0    |
| COX5B              | COX5B              | -2.3 | 0    |
| PLPP4              | PLPP4              | -2.3 | 0.02 |
| RPL32              | RPL32_tv1          | -2.3 | 0    |
| MYNN               | MYNN               | -2.3 | 0    |
| ARAP2              | ARAP2              | -2.3 | 0    |
| JADE3              | JADE3              | -2.3 | 0    |
| ART3               | ART3_tv1           | -2.3 | 0.03 |
| HEPACAM2           | HEPACAM2           | -2.3 | 0    |

|                    |                    |      |      |
|--------------------|--------------------|------|------|
| LOC106510665       | ENSSSCG00000051754 | -2.3 | 0.01 |
| GJA1               | GJA1               | -2.3 | 0    |
| THOC5              | THOC5              | -2.3 | 0    |
| HSPE1              | HSPE1_tv1          | -2.3 | 0    |
| N4BP2L1            | N4BP2L1_tv1        | -2.3 | 0    |
| DAZL               | DAZL               | -2.3 | 0.01 |
| GTPBP8             | GTPBP8_tv1         | -2.3 | 0    |
| HTRA4              | HTRA4_tv1          | -2.3 | 0.01 |
| SKP1               | SKP1               | -2.3 | 0    |
| SASS6              | SASS6              | -2.3 | 0    |
| MCEE               | MCEE               | -2.3 | 0    |
| BRK1               | BRK1               | -2.3 | 0    |
| TMEM167B           | TMEM167B           | -2.3 | 0    |
| ZFP14              | ZFP14_tv1          | -2.3 | 0    |
| CDK1               | CDK1_tv1           | -2.3 | 0    |
| C14orf119          | C14orf119          | -2.3 | 0    |
| ATOX1              | ATOX1              | -2.3 | 0    |
| ENSSSCG00000044841 | ENSSSCG00000044841 | -2.3 | 0    |
| RPL27              | RPL27              | -2.3 | 0    |
| DEPDC1             | DEPDC1_tv1         | -2.3 | 0    |
| TYW5               | TYW5               | -2.3 | 0    |
| UAP1               | UAP1               | -2.3 | 0    |
| C9orf72            | C9orf72            | -2.3 | 0    |
| IFRD2              | IFRD2              | -2.3 | 0    |
| SRP9               | SRP9               | -2.3 | 0    |
| ENSSSCG00000037067 | ENSSSCG00000037067 | -2.3 | 0.03 |
| NDUFB5             | NDUFB5             | -2.3 | 0    |
| CTRB2              | CTRB2              | -2.3 | 0    |
| COQ3               | COQ3_tv1           | -2.3 | 0    |
| HAPLN1             | HAPLN1             | -2.3 | 0    |
| EMC3               | EMC3               | -2.4 | 0    |
| FAM114A2           | FAM114A2           | -2.4 | 0    |
| LSM8               | LSM8               | -2.4 | 0    |
| PSMA5              | PSMA5_tv1          | -2.4 | 0    |
| NAT1               | NAT1               | -2.4 | 0    |
| NR0B1              | NR0B1              | -2.4 | 0    |
| ZFP37              | ENSSSCG00000005475 | -2.4 | 0    |
| UQCRC2             | UQCRC2             | -2.4 | 0    |
| TNIP3              | TNIP3_tv3          | -2.4 | 0.05 |
| RPS15              | RPS15              | -2.4 | 0    |
| ITPRID1            | ITPRID1            | -2.4 | 0    |
| RFC3               | RFC3               | -2.4 | 0    |
| NXT2               | NXT2_tv1           | -2.4 | 0    |
| SEC61G             | SEC61G_tv1         | -2.4 | 0    |
| RPL9L*             | ENSSSCG00000012427 | -2.4 | 0    |
| FAM96A             | FAM96A_tv1         | -2.4 | 0    |
| ZC3H12B            | ZC3H12B            | -2.4 | 0.01 |

|            |                    |      |      |
|------------|--------------------|------|------|
| RPS27L     | RPS27L             | -2.4 | 0    |
| RPL18Ps*   | ENSSSCG00000031482 | -2.4 | 0    |
| DNAJC12    | DNAJC12            | -2.4 | 0.01 |
| CRYZ       | CRYZ               | -2.4 | 0    |
| HSD11B1L   | HSD11B1L           | -2.4 | 0    |
| CYP39A1    | CYP39A1_tv1        | -2.4 | 0    |
| ADCY1      | ADCY1_tv1          | -2.4 | 0.03 |
| LINS1      | LINS1              | -2.4 | 0    |
| MT-ND4L    | MT-ND4L            | -2.4 | 0    |
| CENPN      | CENPN_tv2          | -2.4 | 0    |
| ATP5MG     | ATP5MG             | -2.4 | 0    |
| ZNF684L    | ZNF684L            | -2.4 | 0    |
| DPYS       | DPYS               | -2.4 | 0.05 |
| HAVCR2     | HAVCR2             | -2.4 | 0.01 |
| NDUFC2     | NDUFC2             | -2.4 | 0    |
| SUMO2      | SUMO2              | -2.4 | 0    |
| RPL14      | ENSSSCG00000011272 | -2.4 | 0    |
| RNF141     | RNF141_tv1         | -2.4 | 0    |
| SUMO1      | SUMO1              | -2.4 | 0    |
| DNAJC19    | DNAJC19            | -2.4 | 0    |
| RPS18      | RPS18              | -2.4 | 0    |
| IFIT1      | IFIT1_tv1          | -2.4 | 0    |
| ADAM3B     | ADAM3B             | -2.4 | 0.03 |
| LAMTOR2    | LAMTOR2_tv1        | -2.4 | 0    |
| SMIM8      | SMIM8              | -2.4 | 0    |
| RAB27B     | RAB27B             | -2.4 | 0    |
| MOB4       | MOB4_tv1           | -2.4 | 0    |
| ROMO1      | ROMO1              | -2.4 | 0    |
| STMN1      | STMN1              | -2.4 | 0.02 |
| KRR1       | KRR1               | -2.4 | 0    |
| COPS2      | COPS2              | -2.4 | 0    |
| MIS18A     | MIS18A             | -2.4 | 0    |
| SELENOT    | SELENOT            | -2.4 | 0    |
| ZNF658     | ZNF658             | -2.4 | 0    |
| FNIP2      | FNIP2              | -2.4 | 0    |
| RPS20      | RPS20              | -2.4 | 0    |
| CCNB1IP1   | CCNB1IP1           | -2.4 | 0    |
| LACTB2     | LACTB2             | -2.4 | 0    |
| RPS11      | RPS11              | -2.4 | 0    |
| RPL23A     | RPL23A             | -2.4 | 0    |
| CCR2       | CCR2               | -2.4 | 0.03 |
| MRO        | MRO                | -2.4 | 0    |
| SGK3       | SGK3_tv1           | -2.4 | 0    |
| THYN1      | THYN1_tv1          | -2.5 | 0.01 |
| SAMD9_tv2  | SAMD9_tv2          | -2.5 | 0.01 |
| Pseudogene | Pseudogene         | -2.5 | 0    |
| CCDC28A    | CCDC28A            | -2.5 | 0    |

|                    |                    |      |      |
|--------------------|--------------------|------|------|
| C7H6orf125         | C7H6orf125         | -2.5 | 0    |
| ERO1B              | ERO1B              | -2.5 | 0    |
| INTU               | INTU               | -2.5 | 0    |
| POMP               | POMP               | -2.5 | 0    |
| NCK1               | NCK1_tv            | -2.5 | 0    |
| COX7A2L            | COX7A2L            | -2.5 | 0    |
| EIF2S3Y            | EIF2S3Y            | -2.5 | 0    |
| RPS28              | RPS28              | -2.5 | 0    |
| GEN1               | GEN1               | -2.5 | 0    |
| H3F3B              | H3F3B              | -2.5 | 0    |
| LOC100515582       | ENSSSCG00000040019 | -2.5 | 0.02 |
| NDUFS5             | NDUFS5             | -2.5 | 0    |
| FABP3              | FABP3              | -2.5 | 0    |
| EFCAB10            | EFCAB10_tv2        | -2.5 | 0.01 |
| STMN2              | STMN2              | -2.5 | 0.04 |
| SNX16              | SNX16              | -2.5 | 0    |
| ISCA2              | ISCA2              | -2.5 | 0    |
| TMEM60             | TMEM60             | -2.5 | 0    |
| BTG3               | BTG3_tv2           | -2.5 | 0    |
| MRPS10             | MRPS10             | -2.5 | 0    |
| AK6                | AK6                | -2.5 | 0.01 |
| PET100             | PET100             | -2.5 | 0    |
| ZNF300             | ZNF300             | -2.5 | 0    |
| CCT6B              | CCT6B              | -2.5 | 0.03 |
| C11orf71           | C11orf71           | -2.5 | 0.02 |
| TRIM10             | TRIM10             | -2.5 | 0.04 |
| PBK                | PBK                | -2.5 | 0    |
| TUBE1              | TUBE1              | -2.5 | 0    |
| CSKMT              | CSKMT              | -2.5 | 0.01 |
| CHRNA6             | CHRNA6_tv1         | -2.5 | 0.03 |
| ZFP82L*            | ZFP82L*            | -2.5 | 0    |
| RPS18Ps2*          | ENSSSCG00000046110 | -2.5 | 0    |
| CYP27B1            | CYP27B1            | -2.5 | 0    |
| TIMM8A             | TIMM8A             | -2.5 | 0    |
| RPS27              | ENSSSCG00000031838 | -2.5 | 0    |
| SF3B6              | SF3B6              | -2.5 | 0    |
| LncRNA             | LncRNA             | -2.6 | 0.03 |
| SLC39A8            | SLC39A8_tv2        | -2.6 | 0    |
| ENSSSCG00000034829 | ENSSSCG00000034829 | -2.6 | 0.02 |
| ZNF501             | ZNF501_tv1         | -2.6 | 0.01 |
| RPS7               | RPS7               | -2.6 | 0    |
| UNK57*             | UNK57              | -2.6 | 0    |
| MAGOH              | MAGOH              | -2.6 | 0    |
| THAP5              | THAP5              | -2.6 | 0    |
| PDCD10             | PDCD10             | -2.6 | 0    |
| CNEP1R1            | CNEP1R1_tv2        | -2.6 | 0    |
| LGALS1             | LGALS1             | -2.6 | 0    |

|                |                     |      |      |
|----------------|---------------------|------|------|
| PLBD1          | PLBD1               | -2.6 | 0    |
| RPL7           | RPL7                | -2.6 | 0    |
| ERI2           | ERI2_tv1            | -2.6 | 0.01 |
| PNO1           | PNO1                | -2.6 | 0    |
| METTTL18       | METTTL18            | -2.6 | 0    |
| RPS18Ps*       | ENSSSCG00000008767  | -2.6 | 0    |
| MED21          | MED21               | -2.6 | 0    |
| AOAH_tv1       | AOAH_tv1            | -2.6 | 0.02 |
| LOC100621455   | ENSSSCG000000041401 | -2.6 | 0    |
| NXNL2          | NXNL2               | -2.6 | 0.01 |
| SLC6A15        | SLC6A15             | -2.6 | 0.01 |
| RSL24D1        | RSL24D1             | -2.6 | 0    |
| TSTD1          | TSTD1               | -2.6 | 0    |
| MAEL           | MAEL                | -2.6 | 0.01 |
| MRPL13         | MRPL13              | -2.6 | 0    |
| TIAL1          | TIAL1_tv2           | -2.6 | 0.01 |
| SLC25A14       | SLC25A14_tvX3       | -2.6 | 0    |
| OXSM           | OXSM_tv1            | -2.6 | 0    |
| ATP5PDL*       | ENSSSCG00000016881  | -2.6 | 0    |
| CA7            | CA7                 | -2.6 | 0.03 |
| CST6           | CST6                | -2.7 | 0.01 |
| LYRM2          | ENSSSCG00000004324  | -2.7 | 0    |
| PTPN22         | PTPN22              | -2.7 | 0.01 |
| RPL36A-HNRNPH2 | RPL36A-HNRNPH2      | -2.7 | 0    |
| AKR1C1         | AKR1C1              | -2.7 | 0    |
| RNASE12        | RNASE12             | -2.7 | 0    |
| MBIP           | MBIP                | -2.7 | 0    |
| MRPL50         | MRPL50              | -2.7 | 0    |
| PCGF6          | PCGF6_tv1           | -2.7 | 0    |
| CCNG1          | CCNG1_tv            | -2.7 | 0    |
| LOC106509080   | LOC106509080        | -2.7 | 0.03 |
| ZNF277         | ZNF277              | -2.7 | 0    |
| LOC110257263   | ENSSSCG000000041925 | -2.7 | 0    |
| TMEM210        | TMEM210             | -2.7 | 0.04 |
| RPL39          | ENSSSCG000000030849 | -2.7 | 0    |
| CDH3           | CDH3                | -2.7 | 0    |
| LOC100627892   | LOC100627892_tv1    | -2.7 | 0    |
| CAPZA2         | CAPZA2              | -2.7 | 0    |
| C1orf146       | C1orf146            | -2.7 | 0.01 |
| HIST1H4A       | HIST1H4A            | -2.7 | 0.01 |
| RPS29          | ENSSSCG000000038507 | -2.7 | 0    |
| BEX5           | BEX5                | -2.7 | 0    |
| RPL17-C18orf32 | RPL17-C18orf32      | -2.7 | 0    |
| FMO1           | FMO1_tvX2           | -2.7 | 0    |
| UBB            | UBB                 | -2.7 | 0    |
| RPL22L1        | ENSSSCG000000036114 | -2.7 | 0    |
| B2M            | B2M                 | -2.7 | 0    |

|                    |                    |      |      |
|--------------------|--------------------|------|------|
| MYL7               | MYL7               | -2.8 | 0    |
| H2AFVPs*           | ENSSSCG00000041469 | -2.8 | 0.01 |
| ZBBX               | ZBBX               | -2.8 | 0.05 |
| LOC110262153       | ENSSSCG00000047803 | -2.8 | 0.01 |
| FMC1               | FMC1               | -2.8 | 0    |
| ATP5PO             | ATP5PO             | -2.8 | 0    |
| LOC102159522       | ENSSSCG00000041230 | -2.8 | 0.01 |
| RPL35A             | RPL35A             | -2.8 | 0    |
| SAMD13             | SAMD13             | -2.8 | 0    |
| ADAD1              | ADAD1              | -2.8 | 0    |
| FAM200B            | ENSSSCG00000041490 | -2.8 | 0.02 |
| SNAP23             | SNAP23_tv2         | -2.8 | 0.03 |
| ARPP19Ps*          | ENSSSCG00000037176 | -2.8 | 0.02 |
| ENSSSCG00000037551 | ENSSSCG00000037551 | -2.8 | 0.04 |
| FOLH1              | FOLH1_tv1          | -2.8 | 0    |
| CLECL1             | CLECL1_tvX1        | -2.8 | 0    |
| MRPL39             | MRPL39             | -2.8 | 0    |
| PSMA2              | PSMA2              | -2.8 | 0    |
| RGS18              | RGS18              | -2.8 | 0    |
| MORN2              | MORN2              | -2.8 | 0    |
| FANCF              | FANCF              | -2.9 | 0.01 |
| GTF2H5             | GTF2H5             | -2.9 | 0    |
| PAGE2BL*           | ENSSSCG00000049886 | -2.9 | 0.02 |
| ENSSSCG00000035654 | ENSSSCG00000035654 | -2.9 | 0    |
| ENSSSCG00000042457 | ENSSSCG00000042457 | -2.9 | 0    |
| CYB5R4             | CYB5R4             | -2.9 | 0    |
| DDX25              | DDX25              | -2.9 | 0    |
| LRRC39             | LRRC39             | -2.9 | 0    |
| SLC44A5            | SLC44A5_tv2        | -2.9 | 0    |
| AIF1               | AIF1_tv3           | -2.9 | 0    |
| LIN9               | LIN9_tv1           | -2.9 | 0    |
| BCL2A1             | BCL2A1_tv1         | -2.9 | 0.03 |
| FASTKD2            | FASTKD2_tv3        | -2.9 | 0    |
| KYNU               | KYNU_tvX1          | -2.9 | 0.02 |
| IFI44L             | IFI44L_tvX1        | -2.9 | 0    |
| C8orf37            | C8orf37            | -2.9 | 0    |
| WFDC21L            | WFDC21L            | -2.9 | 0    |
| PSMA8              | PSMA8              | -2.9 | 0.04 |
| MT3                | MT3                | -2.9 | 0.01 |
| LncRNA             | LncRNA             | -3   | 0    |
| TSG101             | ENSSSCG00000041063 | -3   | 0.01 |
| SMIM14             | SMIM14             | -3   | 0    |
| ABHD18             | ABHD18_tv4         | -3   | 0.04 |
| COX7B              | COX7B              | -3   | 0    |
| CD36L1             | CD36L1             | -3   | 0    |
| TMC2               | TMC2               | -3   | 0.04 |
| ENSSSCG00000041281 | ENSSSCG00000041281 | -3   | 0    |

|                    |                     |      |      |
|--------------------|---------------------|------|------|
| UBD                | UBD                 | -3   | 0    |
| MTRNR2L8           | MTRNR2L8            | -3   | 0    |
| ZDBF2              | ZDBF2               | -3   | 0    |
| WDR49              | WDR49               | -3   | 0.02 |
| LY96               | LY96                | -3   | 0    |
| ENSSSCG00000043633 | ENSSSCG00000043633  | -3   | 0.01 |
| SETD9              | SETD9               | -3   | 0    |
| SUMO4              | SUMO4               | -3   | 0    |
| ABRACL             | ABRACL              | -3.1 | 0    |
| COCH               | COCH                | -3.1 | 0    |
| AP1S3_tv1          | AP1S3_tv1           | -3.1 | 0.04 |
| RPS21              | RPS21               | -3.1 | 0    |
| ETFRF1             | ETFRF1              | -3.1 | 0    |
| SLIRP              | SLIRP               | -3.1 | 0    |
| ATG4C              | ATG4C_tv1           | -3.1 | 0    |
| GTPBP3             | GTPBP3_tvIII        | -3.1 | 0.03 |
| PABPC5             | PABPC5              | -3.1 | 0    |
| RPL27Ps*           | ENSSSCG00000007500  | -3.1 | 0    |
| LOC110256941       | ENSSSCG000000050742 | -3.1 | 0.01 |
| PRPS2              | PRPS2_tv2           | -3.1 | 0.02 |
| RPS16              | RPS16               | -3.2 | 0    |
| RPL14L*            | ENSSSCG00000029003  | -3.2 | 0    |
| SRGN               | SRGN_tv1            | -3.2 | 0    |
| DNAH8              | DNAH8               | -3.2 | 0.05 |
| CALCB              | ENSSSCG000000035649 | -3.2 | 0.02 |
| PCLAF              | PCLAF_tv1           | -3.2 | 0    |
| ENSSSCG00000019832 | ENSSSCG00000019832  | -3.2 | 0.03 |
| ZNF709L2*          | ZNF709L2*           | -3.2 | 0    |
| FCGR3A             | FCGR3A_tv3          | -3.2 | 0    |
| TFRC               | TFRC_tv1            | -3.2 | 0    |
| MDP1               | MDP1                | -3.2 | 0.01 |
| LY75               | LY75                | -3.2 | 0.03 |
| RPS23L*            | ENSSSCG00000012200  | -3.2 | 0    |
| FXN                | FXN_tv1             | -3.3 | 0.04 |
| RPS15A             | RPS15A              | -3.3 | 0    |
| LOC106508846       | ENSSSCG00000043973  | -3.3 | 0.04 |
| SCGB2A2            | SCGB2A2             | -3.3 | 0.03 |
| ENSSSCG00000042551 | ENSSSCG00000042551  | -3.3 | 0.05 |
| RPL11L             | RPL11L              | -3.3 | 0    |
| ARHGAP15           | ARHGAP15_tv1        | -3.3 | 0    |
| RSAD2              | RSAD2               | -3.3 | 0.01 |
| NDUFA1             | NDUFA1              | -3.3 | 0    |
| H4C9               | H4C9                | -3.4 | 0    |
| SLX4IP             | SLX4IP              | -3.4 | 0    |
| GZMA               | GZMA                | -3.4 | 0.01 |
| LOC100738624       | ENSSSCG00000048214  | -3.4 | 0.03 |
| ZBPB2              | ZBPB2               | -3.4 | 0    |



|                    |                    |      |      |
|--------------------|--------------------|------|------|
| KHDC1              | ENSSSCG00000050380 | -3.4 | 0.04 |
| LOC110257033       | ENSSSCG00000047522 | -3.4 | 0.03 |
| RPA3               | RPA3               | -3.4 | 0    |
| RPS23Ps3*          | ENSSSCG00000039020 | -3.4 | 0    |
| C8orf89            | C8orf89            | -3.5 | 0.02 |
| ENSSSCG00000043724 | ENSSSCG00000043724 | -3.5 | 0.02 |
| RPL22L1Ps*         | ENSSSCG00000015460 | -3.5 | 0    |
| SLC30A10           | SLC30A10           | -3.5 | 0.03 |
| CXCL10             | CXCL10             | -3.5 | 0    |
| IL20RB             | IL20RB             | -3.5 | 0    |
| PAGE2B             | PAGE2B             | -3.5 | 0    |
| GDAP1L1            | GDAP1L1            | -3.5 | 0.05 |
| C4BPA              | C4BPA_tv1          | -3.6 | 0    |
| TMSB15B            | TMSB15B_tv2        | -3.6 | 0    |
| LOC110261477       | LOC110261477       | -3.6 | 0    |
| LCMT1              | LCMT1_tv1          | -3.6 | 0.03 |
| IL18               | IL18_tv1           | -3.6 | 0.01 |
| ENSSSCG00000042764 | ENSSSCG00000042764 | -3.6 | 0.05 |
| PON2               | PON2_tv1           | -3.6 | 0    |
| GLRX               | GLRX_tv1           | -3.6 | 0    |
| KCNMB3             | KCNMB3             | -3.6 | 0    |
| IFI6               | IFI6               | -3.6 | 0    |
| PLAC8              | PLAC8_tv2          | -3.7 | 0    |
| ZNF345             | ZNF345_tv1         | -3.7 | 0    |
| ARPC3              | ARPC3              | -3.7 | 0    |
| ACSM4              | ACSM4_tv1          | -3.7 | 0.04 |
| IL1R2              | IL1R2_tv1          | -3.8 | 0    |
| FRYL               | FRYL_tvX4          | -3.8 | 0.04 |
| UGT2A1             | UGT2A1_tv1         | -3.8 | 0    |
| IFI27              | ISG12(A)           | -3.8 | 0    |
| TMPRSS15           | TMPRSS15           | -3.8 | 0.03 |
| MEP1B              | MEP1B              | -3.8 | 0.04 |
| IGJ                | IGJ_tv1            | -3.8 | 0    |
| CYP3A46            | CYP3A46            | -3.8 | 0.03 |
| MFF                | MFF_tv6            | -3.9 | 0.02 |
| C12orf50           | C12orf50           | -3.9 | 0.03 |
| LOC106505711       | ENSSSCG00000050456 | -3.9 | 0    |
| ENSSSCG00000043294 | ENSSSCG00000043294 | -4   | 0.03 |
| CUBN               | ENSSSCG00000036046 | -4   | 0.05 |
| EYS                | EYS_tv1            | -4   | 0    |
| MGAT4C             | MGAT4C             | -4   | 0    |
| SLC16A6            | SLC16A6            | -4   | 0    |
| RPS24Ps*           | ENSSSCG00000016840 | -4   | 0    |
| MROH5L*            | ENSSSCG00000033737 | -4   | 0.01 |
| GPR174             | GPR174             | -4   | 0.03 |
| SFR1               | SFR1               | -4   | 0    |
| PRKACB             | PRKACB_tv1         | -4.1 | 0    |

|                    |                    |      |      |
|--------------------|--------------------|------|------|
| ALK                | ALK                | -4.1 | 0    |
| TMSB15A            | ENSSSCG00000028695 | -4.1 | 0    |
| CBR4               | CBR4_tv1           | -4.2 | 0    |
| TAGLN3             | TAGLN3             | -4.2 | 0    |
| SLC1A1             | SLC1A1             | -4.2 | 0    |
| LOC102165335       | ENSSSCG00000014186 | -4.2 | 0.03 |
| NUGGC              | NUGGC              | -4.2 | 0.03 |
| IGSF8              | IGSF8              | -4.2 | 0.04 |
| ZFAND4             | ZFAND4             | -4.2 | 0.04 |
| SV2B               | SV2B               | -4.2 | 0.01 |
| RPS16Ps*           | ENSSSCG00000005432 | -4.3 | 0    |
| ENSSSCG00000048222 | ENSSSCG00000048222 | -4.3 | 0.05 |
| C3orf14            | C3orf14            | -4.3 | 0    |
| ZNF616             | ZNF616             | -4.4 | 0.04 |
| ANKRD22            | ANKRD22            | -4.4 | 0    |
| CIDEA              | CIDEA_tv1          | -4.4 | 0    |
| CTRB2L             | CTRB2L             | -4.4 | 0.03 |
| DEFB123            | DEFB123_tv1        | -4.5 | 0    |
| RPL23AL*           | RPL23AL*           | -4.5 | 0    |
| SVBP               | SVBP_tvX1          | -4.5 | 0    |
| SPESP1             | SPESP1             | -4.5 | 0.05 |
| DYNLT2B            | DYNLT2B_tv2        | -4.6 | 0    |
| RDH16              | RDH16              | -4.6 | 0    |
| CA5B               | CA5B               | -4.6 | 0.03 |
| DEFB122            | DEFB122            | -4.7 | 0    |
| ADH1C              | ADH1C              | -4.7 | 0.03 |
| SNX14              | SNX14_tv1          | -4.7 | 0.01 |
| NT5C3              | NT5C3              | -4.7 | 0.03 |
| GNAT3              | GNAT3              | -4.7 | 0.01 |
| PNLIPRP2           | PNLIPRP2           | -4.8 | 0    |
| MIR1244-1          | MIR1244-1          | -4.8 | 0    |
| TGM5               | TGM5               | -4.8 | 0.01 |
| FAAP24             | FAAP24_tv1         | -4.8 | 0.03 |
| PJVK               | PJVK               | -4.8 | 0    |
| SDR16C5            | SDR16C5_tv2        | -4.9 | 0.02 |
| APOH               | APOH               | -4.9 | 0.01 |
| FGL1               | FGL1               | -5   | 0    |
| S100A12            | S100A12            | -5   | 0    |
| RPS27APs*          | ENSSSCG00000035890 | -5   | 0    |
| ABCD3              | ABCD3_tv1          | -5.2 | 0.01 |
| Y_RNA_4            | Y_RNA_4            | -5.2 | 0    |
| lncRNA             | lncRNA             | -5.5 | 0    |
| CASP1              | CASP1              | -5.5 | 0    |
| LOC102166448       | ENSSSCG00000042624 | -5.9 | 0.01 |
| NR1I2              | NR1I2              | -5.9 | 0    |
| LYZ                | LYZ-1              | -6   | 0    |
| C5orf58            | C5orf58            | -6.2 | 0    |

|                                    |                                    |       |      |
|------------------------------------|------------------------------------|-------|------|
| CYP3A29                            | CYP3A29                            | -6.2  | 0    |
| SNX31                              | SNX31                              | -6.3  | 0    |
| TSACC                              | TSACC                              | -6.9  | 0    |
| T                                  | T_tvX1                             | -7.2  | 0.02 |
| SAA3                               | SAA3_tv1                           | -8.1  | 0.01 |
| CLPS                               | CLPS_tv1                           | -8.6  | 0    |
| RBM18                              | RBM18_tv1                          | -9.5  | 0.01 |
| LAGE3                              | ENSSSCG00000049540                 | -9.7  | 0.01 |
| KCNV2                              | KCNV2                              | -11.5 | 0.03 |
| RPH3A                              | RPH3A                              | -13.4 | 0    |
| CDX4                               | CDX4                               | -14.6 | 0    |
| GZMH                               | GZMH                               | -17.4 | 0    |
| LOC102167708                       | ENSSSCG00000034022                 | -20.2 | 0    |
| PHYHIPL                            | PHYHIPL                            | -27.6 | 0    |
| Endonuclease/reverse transcriptase | Endonuclease/reverse transcriptase | -30.8 | 0    |
| ENSSSCG00000047702                 | ENSSSCG00000047702                 | -31.7 | 0.04 |
| Endonuclease/reverse transcriptase | ENSSSCG00000040992                 | -57.9 | 0    |
| UNK95*                             | UNK95*                             | -80.6 | 0    |
