# Supplementary material for: Soy Formula Is Not Estrogenic and Does Not Result in Reproductive Toxicity in Male Piglets: Results from a Controlled Feeding Study
Source: MDPI journal article supplement (doi:10.3390/nu14051126), 2022-03-07
Supplement: s1 [file s1]

| Ingenuity Canonical Pathways                   | -log(p-value) |
|------------------------------------------------|---------------|
| Mitochondrial Dysfunction                      | 5.93          |
| Oxidative Phosphorylation                      | 4.97          |
| Citrulline-Nitric Oxide Cycle                  | 3.66          |
| Arginine Biosynthesis IV                       | 3.48          |
| Urea Cycle                                     | 3.48          |
| Superpathway of Citrulline Metabolism          | 2.65          |
| Superpathway of Cholesterol Biosynthesis       | 2.11          |
| Sirtuin Signaling Pathway                      | 1.95          |
| L-serine Degradation                           | 1.85          |
| Trans, trans-farnesyl Diphosphate Biosynthesis | 1.73          |
| Ferroptosis Signaling Pathway                  | 1.68          |
| GP6 Signaling Pathway                          | 1.68          |
| Tyrosine Degradation I                         | 1.63          |
| Ceramide Biosynthesis                          | 1.55          |
| Zymosterol Biosynthesis                        | 1.55          |
| Semaphorin Signaling in Neurons                | 1.5           |
| Mineralocorticoid Biosynthesis                 | 1.43          |
| Estrogen Receptor Signaling                    | 1.39          |
| Glucocorticoid Biosynthesis                    | 1.38          |
| Glucocorticoid Receptor Signaling              | 1.36          |
