# Supplementary material for: Soy Formula Is Not Estrogenic and Does Not Result in Reproductive Toxicity in Male Piglets: Results from a Controlled Feeding Study
Source: MDPI journal article supplement (doi:10.3390/nu14051126), 2022-03-07
Supplement: s1 [file s1]

| Reannotated Gene | Gene                | Fold Change | FDR  |
|------------------|---------------------|-------------|------|
| SMAD6            | SMAD6               | 7.6         | 0.01 |
| PCDHGA4          | PCDHGA4_tv1         | 7.5         | 0    |
| LOC100514340     | ENSSSCG00000032383  | 7.4         | 0.04 |
| MT-TV            | ENSSSCG00000018062  | 6.9         | 0    |
| NRIP2            | NRIP2               | 5.8         | 0.02 |
| SPTA1            | SPTA1               | 4.5         | 0.03 |
| UGT1A1           | ENSSSCG00000036274  | 4.2         | 0.01 |
| GUSB             | GUSB                | 4           | 0.02 |
| TMEM37           | TMEM37              | 3.9         | 0    |
| RNF183           | RNF183              | 3.9         | 0.04 |
| LOC110260790     | ENSSSCG000000049984 | 3.6         | 0.04 |
| APLN             | APLN                | 3.2         | 0.01 |
| NIM1K            | NIM1K               | 3.2         | 0    |
| TNR              | TNR                 | 3.1         | 0.01 |
| LINGO1           | LINGO1              | 3           | 0.04 |
| NTF3             | NTF3                | 3           | 0.02 |
| CARNS1           | CARNS1              | 2.6         | 0.01 |
| CDK18            | CDK18_tv3           | 2.6         | 0.04 |
| GRIN2C           | GRIN2C              | 2.4         | 0.04 |
| TP53INP2         | TP53INP2_tv1        | 2.4         | 0    |
| APLNR            | APLNR               | 2.4         | 0.04 |
| LDLR             | LDLR_tv1            | 2.4         | 0.04 |
| ASCC2            | ASCC2               | 2.2         | 0.04 |
| IRAK2            | IRAK2               | 2.1         | 0.04 |
| CTRB2            | CTRB2               | -2.1        | 0.05 |
| DIPK2A           | DIPK2A              | -2.2        | 0.04 |
| NUF2             | NUF2                | -2.2        | 0.04 |
| PDK4             | PDK4                | -2.2        | 0.01 |
| SLF1             | SLF1                | -2.2        | 0.03 |
| TXLNB            | TXLNB               | -2.3        | 0.04 |
| TXNIP            | TXNIP_tv1           | -2.3        | 0    |
| CCNG2            | CCNG2               | -2.3        | 0.03 |
| PLBD1            | PLBD1               | -2.5        | 0    |
| FAM72A           | ENSSSCG00000039370  | -2.5        | 0.02 |
| TNNT1            | TNNT1               | -2.5        | 0.04 |
| PPM1K            | PPM1K               | -2.6        | 0    |
| GRB14            | GRB14               | -2.6        | 0.02 |
| ALK              | ALK                 | -2.7        | 0.01 |
| VSIG1            | VSIG1_tv2           | -2.7        | 0    |
| ARRDC3           | ARRDC3_tv1          | -2.8        | 0    |
| RPS24Ps*         | ENSSSCG00000016840  | -2.8        | 0.03 |
| RPS23L*          | ENSSSCG00000012200  | -2.8        | 0.01 |
| IGJ              | IGJ_tv1             | -2.9        | 0.05 |
| MGAT4C           | MGAT4C              | -2.9        | 0.01 |
| LOC110261477     | LOC110261477        | -2.9        | 0.02 |
| SELENOP          | SELENOP             | -3          | 0    |

|                                    |                                    |       |      |
|------------------------------------|------------------------------------|-------|------|
| TDH                                | ENSSSCG00000021767                 | -3.1  | 0    |
| SPP1                               | SPP1_tv1                           | -3.3  | 0    |
| RGS18                              | RGS18                              | -3.4  | 0.01 |
| LRRC39                             | LRRC39                             | -3.4  | 0    |
| COCH                               | COCH                               | -3.6  | 0    |
| FCGR3A                             | FCGR3A_tv3                         | -3.6  | 0.03 |
| ENSSSCG00000035654                 | ENSSSCG00000035654                 | -3.6  | 0    |
| IFI27                              | ISG12(A)                           | -3.9  | 0    |
| BEX2                               | ENSSSCG00000039273                 | -3.9  | 0    |
| LY96                               | LY96                               | -4.3  | 0    |
| FMO1                               | FMO1_tvX2                          | -4.8  | 0    |
| SNX31                              | SNX31                              | -4.8  | 0.04 |
| ENSSSCG00000042146                 | ENSSSCG00000042146                 | -5    | 0.03 |
| IFI6                               | IFI6                               | -5.1  | 0    |
| lncRNA                             | lncRNA                             | -5.2  | 0.01 |
| GZMH                               | GZMH                               | -6.2  | 0.05 |
| LOC106505425                       | ENSSSCG00000048436                 | -6.2  | 0.04 |
| ANKRD22                            | ANKRD22                            | -6.3  | 0.03 |
| ENSSSCG00000045049                 | ENSSSCG00000045049                 | -7.2  | 0.01 |
| TMPRSS15                           | TMPRSS15                           | -7.5  | 0.04 |
| KLK1                               | KLK1                               | -8    | 0.01 |
| CYP3A29                            | CYP3A29                            | -8.2  | 0.05 |
| CXCL13                             | CXCL13                             | -9.6  | 0    |
| S100A12                            | S100A12                            | -13.3 | 0    |
| UNK95*                             | UNK95*                             | -13.3 | 0.01 |
| RNASE12                            | RNASE12                            | -23.7 | 0.01 |
| Endonuclease/reverse transcriptase | Endonuclease/reverse transcriptase | -23.9 | 0    |
| PHYHIPL                            | PHYHIPL                            | -40   | 0    |
| ENSSSCG00000046140                 | ENSSSCG00000046140                 | -91.8 | 0    |
